# Supplementary material for: Systematic Analysis of the Expression and Prognosis of Fcγ Receptors in Clear Cell Renal Cell Carcinoma
Source: Front Oncol. 2022 Mar 17;12:755936. doi: 10.3389/fonc.2022.755936 (PMC8969749; doi:10.3389/fonc.2022.755936)
Supplement: Supplementary file 1 [file Table_1.xlsx]

## Sheet: Sheet1
submitter_id.samples	age_at_initial_pathologic_diagnosis	tumor_stage.diagnoses	neoplasm_histoloic_rade	pathologic_	pathologic_	pathologic_T	gender.demographic(1=male,0=female)	OS	OS.time	FCGR2B	FCGR2C	FCGR2A	FCGR3A	FCGR3B	FCGR1B	FCGR1A	FCGR1C	laterality	race.demographic	longest_dimension.samples
TCGA-CW-6087-01A	61	4	4	1	1	T3a	1	1	41	7.3576	6.5813	12.3159	15.0255	7.5858	10.6818	11.2417	8.9648	Right	white	0.8
TCGA-AK-3426-01A	37	3	3	0	1	T3a	1	1	885	9.9752	8.4417	11.6779	12.8269	7.2458	10.7531	11.0278	9.2214	Right	white	1
TCGA-BP-4167-01A	59	3	2	0	X	T3a	1	0	2718	10.0034	8.0036	11.9415	13.1377	6.1145	10.1446	10.4925	8.4315	Right	white	1.3
TCGA-CJ-4890-01A	72	4	4	1	0	T3a	1	0	3519	10.2098	8.738	12.7101	13.4104	4.0239	9.6917	10.2139	8.0773	Left	white	2.6
TCGA-B0-4690-01A	65	4	3	1	0	T4	1	1	43	9.8799	9.1076	12.1283	14.0379	9.488	9.8371	10.15	8.0618	Right	white	1.6
TCGA-B8-5551-01A	65	1	3	0	0	T1b	0	0	16	10.8308	9.2923	12.5583	14.2182	5.1782	9.9751	10.0885	8.9454	Right	black or african american	1
TCGA-CZ-4861-01A	63	2	2	0	X	T2	1	1	446	11.6422	10.4631	12.236	14.15	9.5534	9.529	10.0538	7.9472	Left	white	0.8
TCGA-BP-4173-01A	47	2	3	0	0	T2	1	0	1893	9.5249	9.1383	11.9432	14.1902	8.2076	9.6291	10.0062	7.9263	Right	white	1
TCGA-B8-5162-01A	62	2	2	0	X	T2a	1	0	36	9.9098	8.2029	12.6016	14.3107	7.3467	9.3792	9.9578	7.9549	Left	white	1.2
TCGA-CJ-4637-01A	52	4	4	1	X	T2b	0	1	2227	9.4096	8.0163	11.3196	13.6018	3.6627	9.482	9.8821	7.6167	Left	white	2
TCGA-B0-4712-01A	76	4	3	1	X	T3a	1	1	1337	9.1196	7.7717	11.028	12.4689	4.867	9.6275	9.8309	8.6164	Left	white	2
TCGA-B0-4694-01A	72	3	4	0	X	T3b	1	1	106	9.6992	8.1407	11.3817	13.8397	7.2139	9.2755	9.8141	7.7567	Left	white	1.4
TCGA-BP-4354-01A	40	4	4	1	1	T4	1	1	1034	10.2801	9.3202	13.2674	14.1435	10.6393	9.5644	9.7821	8.5182	Left	white	2.3
TCGA-B0-5702-01A	71	1	2	0	0	T1b	1	0	2172	6.6229	2.7525	9.0313	12.017	5.2043	8.9666	9.7148	7.5618	Left	white	0.8
TCGA-CJ-4873-01A	85	3	3	0	0	T3a	0	0	1776	10.0887	8.0669	11.8135	12.5742	4.8235	9.602	9.6896	7.8591	Right	white	3.2
TCGA-B0-5081-01A	79	3	2	0	0	T3b	0	1	362	9.7256	8.4957	11.4391	13.2995	6.0762	9.4107	9.6822	8.1968	Right	white	1.2
TCGA-CJ-4888-01A	59	4	4	1	X	T3a	1	1	1567	9.1346	7.7343	11.5386	13.3201	6.426	9.5622	9.6383	8.3787	Left	white	2.8
TCGA-BP-5191-01A	79	3	2	0	0	T3a	1	0	967	9.413	7.4255	11.2616	12.4299	4.9734	9.8957	9.5916	8.2738	Left	white	1
TCGA-CW-6090-01A	68	1	3	0	X	T1b	1	0	2552	9.7566	8.2957	11.9505	13.122	6.8527	8.9777	9.5334	7.3538	Right	white	0.8
TCGA-CJ-6027-01A	77	1	4	0	X	T1a	1	1	3615	7.4621	6.1267	11.0207	12.9764	5.4135	9.0892	9.5013	7.6054	Right	white	1
TCGA-CJ-5676-01A	47	3	3	0	X	T3b	1	0	4067	7.2014	5.208	11.0549	12.6775	5.0901	8.9366	9.4677	7.4561	Right	white	1.8
TCGA-CJ-6030-01A	65	1	3	0	0	T1a	1	1	2299	9.891	7.8618	12.1786	14.2259	3.8684	9.1321	9.4553	7.2779	Left	white	3.5
TCGA-CZ-5454-01A	63	4	2	1	0	T2	1	1	722	10.9724	9.556	11.7658	13.5405	7.4847	8.9996	9.451	8.0709	Right	white	2
TCGA-B0-4700-01A	60	4	4	1	X	T4	1	1	1980	7.9098	6.4306	11.1111	12.363	5.1097	9.4773	9.427	7.6629	Right	white	3.3
TCGA-CJ-5671-01A	51	1	3	0	X	T1a	1	0	3987	8.7782	7.2944	11.6208	13.0048	3.715	8.9088	9.4266	7.1913	Left	white	1.7
TCGA-CJ-4901-01A	47	3	3	0	X	T3b	1	0	1450	8.4254	7.4005	10.9193	12.7602	5.6305	9.287	9.4096	7.8152	Right	white	3.2
TCGA-AK-3425-01A	68	1	2	0	0	T1	1	0	3343	8.8956	7.0317	10.9264	12.8099	2.5881	8.9316	9.3896	7.3961	Left	white	1.4
TCGA-BP-4989-01A	58	3	3	0	0	T3a	1	0	118	8.5474	7.8473	10.8571	12.8322	5.4878	9.5782	9.3826	7.8897	Right	white	1.8
TCGA-B0-4842-01A	73	3	4	0	0	T3a	0	1	1724	8.0848	5.3569	9.9439	12.1517	9.45	9.3514	9.3665	7.4119	Right	white	2
TCGA-BP-4960-01A	46	2	3	0	0	T2	1	0	2172	8.5986	7.8944	11.3127	12.6891	5.9665	9.0697	9.3275	7.4467	Left	white	1.4
TCGA-CJ-4895-01A	62	4	4	1	X	T3a	1	1	1200	9.0797	7.2341	11.6665	13.6627	3.4181	9.0048	9.3221	7.3317	Left	white	3.5
TCGA-BP-4983-01A	67	3	4	0	X	T3a	0	0	1413	10.6218	9.0702	11.8414	13.3814	6.2993	8.8038	9.3187	7.2133	Right	asian	2
TCGA-B0-4697-01A	46	4	4	1	X	T3b	0	1	578	8.9399	7.9696	11.0561	12.0539	4.7059	9.1624	9.3108	7.5591	Right	white	2
TCGA-B0-4815-01A	65	3	4	0	X	T3a	1	1	1588	8.4418	7.6257	10.6832	13.2631	7.0092	9.6456	9.2987	8.4032	Left	white	1.6
TCGA-B0-4819-01A	60	4	4	1	X	T3b	0	1	183	8.8532	8.3989	10.9287	11.8776	5.8414	9.1885	9.2709	7.589	Right	white	1.8
TCGA-CJ-5677-01A	54	4	4	1	X	T3a	0	1	782	9.2601	7.1677	11.6421	12.6997	3.8571	8.7269	9.264	7.0441	Right	white	2.5
TCGA-BP-4787-01A	59	4	4	1	0	T3a	0	1	480	9.9794	8.4466	11.7257	13.1852	8.3268	8.9289	9.2364	7.4829	Left	white	2.4
TCGA-BP-4777-01A	46	1	3	0	X	T1a	1	0	1731	9.1425	7.5333	11.1073	12.6455	6.2812	8.7941	9.2122	7.1808	Right	white	1
TCGA-B0-4847-01A	60	4	3	1	X	T3a	1	1	793	7.4496	7.3626	11.0545	12.2972	5.9768	9.4139	9.1717	7.7825	Left	white	1.6
TCGA-B8-5164-01A	65	3	3	0	0	T3a	1	0	26	9.2521	8.3263	11.073	13.0363	6.4141	8.9352	9.1707	7.2169	Right	white	1.5
TCGA-B8-4143-01A	66	4	3	1	0	T3a	0	1	709	6.7641	6.3381	10.7755	12.7145	5.513	8.9318	9.1616	7.139	Left	white	1
TCGA-BP-4343-01A	64	3	3	0	0	T3a	1	1	1912	9.7604	7.805	11.5776	13.1823	5.2234	8.771	9.1552	6.9645	Right	white	1.6
TCGA-B8-5163-01A	63	3	3	0	0	T3a	0	0	822	8.4717	7.8483	11.7601	13.7479	6.8494	8.7482	9.1458	7.4565	Right	white	1.3
TCGA-BP-4962-01A	58	2	2	0	X	T2	1	0	1785	9.6312	8.1213	11.2285	12.338	5.8613	8.6592	9.1455	7.1513	Left	white	1.9
TCGA-CJ-4887-01A	48	4	3	1	X	T3a	1	1	932	7.9216	7.2173	11.4535	12.9978	5.3866	9.044	9.0835	7.3409	Right	white	2.3
TCGA-BP-5182-01A	56	1	3	0	0	T1a	1	0	1165	9.5623	8.0156	11.9	11.9034	4.6649	8.5734	9.0775	6.9368	Left	white	1.2
TCGA-B0-4699-01A	74	4	4	1	0	T4	1	1	110	8.3904	7.6938	11.3781	12.6231	5.0327	8.677	9.0703	7.0143	Right	white	2.7
TCGA-A3-3378-01A	60	1	3	0	0	T1	1	0	630	9.4644	9.3974	12.2102	13.9417	10.5143	9.0419	9.05	7.7533	Left	white	1.3
TCGA-CJ-4636-01A	51	3	3	0	0	T3a	1	0	1924	9.0786	8.2805	11.5512	12.9679	5.8358	8.8336	9.046	7.3994	Right	white	3
TCGA-CJ-4881-01A	41	3	3	0	X	T3a	1	0	2014	8.9221	7.734	11.3002	12.9201	8.6777	8.9288	9.0241	7.782	Right	white	3.1
TCGA-CJ-6031-01A	54	1	3	0	X	T1b	1	0	1906	9.3048	7.6478	11.4485	12.694	6.0905	8.9484	9.0173	7.1771	Right	white	3.6
TCGA-BP-5009-01A	52	1	3	0	X	T1b	1	1	1092	8.6547	7.4308	11.0824	12.7969	3.5712	8.7881	9.0112	7.247	Left	white	1.1
TCGA-BP-5199-01A	58	2	4	0	0	T2	1	0	1355	7.0942	5.8395	10.0566	11.6784	1.8794	8.6649	8.9992	7.1998	Left	white	1.5
TCGA-B0-5400-01A	59	3	4	0	0	T3b	0	0	1733	7.7337	5.6473	10.6031	11.2495	9.0264	8.6291	8.9987	7.9917	Right	white	1.5
TCGA-BP-4176-01A	64	1	2	0	X	T1b	1	0	1955	10.5223	8.779	12.1116	12.3954	8.5803	8.3786	8.9936	6.7838	Right	white	1.2
TCGA-CJ-4900-01A	69	4	4	1	1	T4	0	1	1714	10.4671	8.9785	12.328	13.0221	5.2808	8.6044	8.992	7.067	Left	white	3
TCGA-CJ-4641-01A	55	4	4	1	X	T3a	0	1	1661	9.2236	8.1281	11.0436	12.1198	5.2275	8.9964	8.978	7.0207	Left	white	2.5
TCGA-BP-4972-01A	43	3	3	0	X	T3a	0	0	1502	9.6056	8.0898	11.7626	11.8998	7.1538	8.5351	8.9775	6.9752	Left	white	1.6
TCGA-A3-3346-01A	68	1	3	0	X	T1b	1	1	137	10.798	9.4062	11.5582	12.8315	8.7954	8.5716	8.9714	7.1573	Left	white	1.7
TCGA-CJ-5672-01A	84	1	3	0	X	T1a	1	1	1972	8.1458	6.7403	11.0407	12.9519	5.8911	8.5852	8.9514	6.9982	Left	white	3
TCGA-B2-4098-01A	72	1	2	0	X	T1b	0	1	51	10.0082	8.7454	11.2515	12.1119	7.9567	8.5765	8.9497	6.8117	Left	black or african american	2.3
TCGA-B2-3924-01A	73	1	2	0	X	T1b	1	0	1092	6.6134	5.6887	10.8725	13.3544	6.6077	8.8578	8.9383	7.2402	Left	white	2.9
TCGA-B0-4810-01A	47	3	3	0	1	T3a	1	1	478	8.2	6.4733	10.9864	12.0029	5.3263	8.8395	8.9366	7.2149	Left	white	1.5
TCGA-B2-5641-01A	79	1	3	0	0	T1a	1	0	656	8.9282	7.9705	11.0378	13.3212	7.3416	8.2976	8.9217	6.8057	Left	white	1
TCGA-BP-4804-01A	59	1	2	0	X	T1b	1	0	1459	8.5898	6.9512	10.9532	12.6066	3.5013	8.9272	8.9187	7.2681	Right	white	1.6
TCGA-BP-5169-01A	70	1	4	0	0	T1b	1	0	193	9.3004	7.5506	10.9835	12.0725	4.7364	9.3987	8.9004	8.297	Left	white	1.8
TCGA-BP-4160-01A	67	3	2	0	0	T3a	1	0	2881	8.4308	6.7053	10.7861	13.0518	4.8964	8.4976	8.8945	6.4912	Left	white	2
TCGA-CZ-5456-01A	57	2	3	0	0	T2	1	0	2422	9.9747	8.8179	10.6291	11.6519	6.2513	8.2332	8.8922	6.7655	Left	white	1.6
TCGA-CJ-5678-01A	62	4	3	1	0	T2b	1	1	574	9.6643	7.1526	11.1411	12.1566	4.6226	9.0567	8.891	7.5259	Left	black or african american	2.5
TCGA-CJ-5675-01A	70	2	3	0	X	T2a	1	0	3936	7.7535	6.2003	10.7399	13.6955	4.55	8.4741	8.8899	6.8571	Right	white	2.6
TCGA-CZ-5452-01A	69	2	2	0	0	T2	1	0	1789	8.6034	7.9866	10.6428	12.909	8.4464	8.5248	8.8853	6.8681	Right	white	2
TCGA-B0-5108-01A	54	3	2	0	0	T3a	1	0	1782	10.026	8.7864	12.2171	13.2033	6.6119	8.9364	8.8777	7.6239	Left	white	2
TCGA-DV-5574-01A	37	1	2	0	X	T1a	1	0	2016	8.2957	6.4729	11.9521	12.8616	5.5771	8.4957	8.8774	6.8291	Right	white	1.5
TCGA-CJ-4916-01A	69	3	3	0	X	T3a	0	0	1373	8.9888	7.518	11.2019	12.9903	5.399	8.5113	8.8593	6.953	Right	white	2.6
TCGA-B0-4822-01A	78	2	4	0	X	T2	1	1	1111	7.6371	4.4537	10.546	11.6941	4.9319	8.8059	8.8585	7.2911	Right	white	2.5
TCGA-B0-5692-01A	66	3	3	0	0	T3b	0	0	3944	7.7095	5.8533	10.4859	12.285	4.5633	8.4568	8.8584	6.7333	Right	white	1.2
TCGA-CJ-4868-01A	42	4	3	1	0	T3a	1	1	646	8.6475	7.1417	11.5098	12.5371	5.6129	8.6099	8.8496	6.8315	Left	white	3
TCGA-BP-5175-01A	60	1	3	0	X	T1a	1	0	932	7.4669	6.4289	10.4145	11.8358	7.3453	8.5443	8.8447	6.2402	Right	white	1.6
TCGA-B0-5697-01A	50	1	2	0	0	T1a	1	0	2630	8.813	7.3733	10.8483	12.8859	7.0473	8.6062	8.8443	7.0049	Right	white	1.6
TCGA-CZ-5470-01A	72	2	3	0	0	T2	0	0	386	8.9306	7.1555	10.732	12.4727	6.0545	8.5744	8.8431	6.9451	Left	white	1.6
TCGA-BP-4163-01A	60	3	3	0	0	T3a	0	0	2839	9.2287	8.2196	10.8381	12.3236	3.9305	8.4912	8.834	7.4349	Right	white	1.5
TCGA-BP-5170-01A	55	1	2	0	X	T1a	1	0	2412	8.3511	5.8431	11.1004	11.7547	3.7977	8.3783	8.8331	6.8605	Right	white	1.8
TCGA-CZ-4857-01A	56	4	3	1	0	T3a	1	1	1432	8.6475	7.9695	10.9561	12.6732	7.3764	8.8112	8.8157	7.1767	Right	white	1.1
TCGA-BP-4771-01A	62	4	4	1	0	T3a	1	1	162	7.8423	8.0598	10.8673	13.0594	6.3944	9.5118	8.8145	7.7273	Right	white	1.3
TCGA-B0-5083-01A	63	1	3	0	0	T1a	1	1	1045	9.9123	7.8673	11.5308	11.0559	2.5778	8.367	8.8102	6.4993	Left	white	1.4
TCGA-CZ-5455-01A	63	4	4	1	X	T3b	1	1	561	8.193	7.3824	10.9949	13.0169	7.4532	8.2078	8.8013	6.9377	Right	white	1.4
TCGA-B0-4824-01A	49	1	3	0	0	T1a	0	1	1657	8.0423	7.0776	10.4675	12.5761	6.5507	8.6022	8.7765	7.0668	Left	white	1.7
TCGA-B0-4688-01A	46	4	4	1	0	T4	1	1	101	9.0047	7.4579	11.7635	12.4629	2.7816	8.5086	8.7712	6.9757	Left	white	1.7
TCGA-CJ-4891-01A	57	3	4	0	0	T3c	0	1	819	9.1936	7.2293	11.5811	11.831	8.6087	8.7497	8.7697	6.9374	Left	white	3.2
TCGA-B0-5709-01A	62	3	3	0	X	T3a	0	0	3974	9.139	7.8338	11.0394	12.8292	6.0306	8.1893	8.7538	6.4144	Right	white	1.6
TCGA-CZ-5464-01A	69	4	2	1	X	T3b	1	0	2128	8.0813	7.0373	10.731	12.5939	6.0551	8.2608	8.7445	6.7259	Left	white	1.5
TCGA-CZ-4864-01A	86	2	3	0	0	T2	1	1	1315	9.5752	8.6531	10.9462	13.3437	7.0832	8.2689	8.7367	6.7317	Left	white	1.2
TCGA-B0-4827-01A	77	3	4	0	0	T3b	0	1	885	8.5058	6.5137	11.2793	12.5475	6.1467	8.6327	8.7315	6.885	Left	white	2.2
TCGA-BP-4807-01A	42	1	3	0	X	T1a	1	0	211	9.3692	8.4549	11.3592	11.9513	7.6525	8.5657	8.7306	6.8554	Right	white	1.3
TCGA-CJ-4869-01A	49	3	2	0	1	T2	1	0	2554	8.417	6.4857	11.0731	12.6555	5.3048	8.439	8.7283	6.3621	Right	white	3
TCGA-CJ-4923-01A	63	4	4	1	X	T3a	0	1	572	7.7303	6.8943	10.3196	11.818	4.785	8.3973	8.7228	6.8647	Left	white	3
TCGA-BP-4346-01A	57	3	3	0	0	T3b	1	1	1493	7.6622	7.9319	10.7625	12.8611	3.9806	8.93	8.7197	7.2513	Right	white	2
TCGA-A3-3319-01A	70	1	2	0	X	T1b	1	0	1130	8.4412	7.7085	10.8305	12.8196	5.5403	8.6055	8.7175	7.5534	Left	white	1.5
TCGA-B0-4714-01A	81	4	3	1	X	T3b	1	1	99	7.4107	7.7577	10.5784	12.418	5.6244	9.0722	8.7055	7.5238	Right	white	1.5
TCGA-B0-4848-01A	54	3	3	0	X	T3b	1	1	883	9.7592	7.4408	11.203	12.5585	4.2103	8.2338	8.689	6.7732	Left	white	1.4
TCGA-CZ-4858-01A	39	2	4	0	X	T2	1	1	2105	6.5304	6.2124	11.0042	12.6398	6.0626	8.6332	8.678	7.571	Left	white	1.5
TCGA-B0-5106-01A	64	1	2	0	0	T1a	1	1	1598	7.5839	7.5288	11.2385	12.8639	6.8112	8.7753	8.6742	7.8372	Left	white	2
TCGA-AK-3445-01A	69	3	3	0	X	T3a	1	0	2392	7.8195	7.5228	11.112	12.7394	5.1078	8.2377	8.6699	6.8635	Left	white	1.2
TCGA-A3-3347-01A	76	3	2	0	1	T1b	0	1	1610	9.2919	9.1396	12.0342	13.3564	6.2216	8.6543	8.6696	7.2938	Right	white	1.2
TCGA-CJ-5686-01A	59	1	3	0	X	T1b	0	0	2038	8.9091	7.6996	10.9869	12.6822	6.0659	8.5106	8.6439	6.9516	Left	white	1.5
TCGA-B0-5107-01A	65	4	4	1	0	T2	0	1	927	8.7008	6.7528	9.9277	12.0651	3.8213	8.4921	8.6324	6.9547	Right	white	1.5
TCGA-BP-4161-01A	74	1	3	0	X	T1b	1	0	2746	8.2604	7.5777	10.5368	12.3119	6.4367	8.3966	8.6184	6.8745	Right	white	2.1
TCGA-BP-5198-01A	72	3	3	0	0	T3b	1	0	603	9.8967	8.2215	11.3688	12.2782	6.2521	7.9743	8.6096	6.2872	Right	white	2.5
TCGA-B2-4099-01A	83	1	3	0	X	T1a	1	0	972	7.0703	5.6363	10.4773	12.8916	6.081	8.7171	8.6091	7.6608	Right	white	1.7
TCGA-BP-4353-01A	61	1	2	0	0	T1	1	1	375	7.0523	5.8747	11.5032	12.6826	3.5263	8.5117	8.6056	7.0223	Left	white	1.2
TCGA-BP-4345-01A	62	3	3	0	0	T3b	1	0	1516	9.6443	7.8262	11.1243	12.0369	1.163	8.1176	8.6046	6.9064	Right	white	1.5
TCGA-DV-5573-01A	41	1	2	0	X	T1a	1	0	1130	7.4902	8.0558	10.4894	12.8588	6.6572	8.2984	8.5949	6.8451	Right	white	1.4
TCGA-B0-4718-01A	57	3	2	0	X	T3a	1	0	1778	7.7207	7.0162	10.6744	11.5943	0.7575	8.2055	8.5885	6.8535	Left	white	1.2
TCGA-CZ-4863-01A	51	3	3	0	0	T3b	0	0	1928	6.0216	6.2628	10.2225	13.5471	5.6383	8.3365	8.5856	6.8338	Left	white	1
TCGA-B0-5092-01A	53	4	3	1	0	T1a	0	1	459	7.5867	7.3072	10.3534	12.1706	5.4862	8.8366	8.5811	7.6737	Left	white	2
TCGA-CZ-5468-01A	84	4	4	1	X	T3b	1	1	59	7.4494	6.0013	10.8459	12.0099	4.1305	8.3017	8.5716	6.8655	Left	white	1.7
TCGA-BP-4174-01A	49	2	3	0	0	T2	1	0	1879	7.1931	6.7035	10.5369	12.4674	7.2213	8.0125	8.5605	6.1197	Right	white	1.4
TCGA-B0-5109-01A	69	3	4	0	1	T3b	1	1	587	8.1858	7.0894	10.3221	11.6476	9.2784	8.441	8.5535	6.6887	Left	white	1.7
TCGA-BP-5189-01A	60	1	4	0	X	T1b	1	1	822	8.2386	7.8696	11.701	13.0448	6.2896	8.1602	8.5488	6.6148	Right	white	1.5
TCGA-CJ-6028-01A	58	4	4	1	X	T3a	1	1	1625	6.9149	5.3372	10.9715	12.6887	5.6486	8.1015	8.5447	7.0217	Left	white	2
TCGA-A3-3358-01A	57	1	2	0	0	T1a	0	0	1307	10.0651	8.3448	11.4319	12.0986	5.6885	8.491	8.5398	7.0994	Left	white	1
TCGA-B0-4839-01A	80	1	2	0	0	T1b	0	1	1639	8.8899	6.6761	11.6983	12.8572	5.9508	8.4924	8.5338	7.3585	Left	white	1.9
TCGA-CZ-5985-01A	58	2	2	0	0	T2	1	0	1997	8.7242	7.288	10.9884	12.6786	5.49	8.3418	8.5302	6.7016	Right	white	1.8
TCGA-B0-4698-01A	75	4	4	0	X	T4	1	1	42	8.0604	6.8023	11.0197	12.7421	9.2709	8.1268	8.5178	6.7621	Left	white	1.5
TCGA-CJ-4640-01A	49	3	4	0	0	T3a	1	0	3480	9.1092	7.2247	11.0594	13.4146	3.556	8.739	8.515	7.5922	Left	white	2.7
TCGA-CW-5587-01A	62	3	2	0	0	T3b	0	0	2226	7.1289	5.4617	10.4033	12.7088	6.0504	8.0688	8.5027	6.0431	Left	white	2.2
TCGA-B0-5075-01A	77	3	2	0	0	T3a	0	1	637	9.7261	8.4207	11.2373	12.5905	5.6276	8.0708	8.4967	6.5542	Left	white	2
TCGA-A3-3387-01A	49	1	2	0	0	T1a	1	0	617	10.1894	9.0139	12.0642	12.8617	6.6666	8.2011	8.492	6.7387	Left	white	0.9
TCGA-BP-4758-01A	40	1	2	0	X	T1a	1	0	2208	5.7819	4.9508	10.4263	11.7924	5.1215	8.3722	8.4829	6.4412	Right	white	1.9
TCGA-CJ-4884-01A	72	3	3	0	X	T3a	0	0	1759	8.6301	7.2816	10.641	12.1724	4.8037	8.2035	8.4799	6.7221	Right	white	3.4
TCGA-CZ-4860-01A	60	4	4	1	X	T4	1	1	206	9.997	8.1478	11.1794	12.5078	3.4167	8.2319	8.4726	6.5885	Right	white	1.3
TCGA-CW-5588-01A	78	1	2	0	X	T1a	0	0	2017	8.3914	6.8515	11.1418	12.8656	7.2095	7.8882	8.4462	5.8314	Right	white	1.2
TCGA-B0-4843-01A	57	3	3	0	0	T3a	1	1	320	7.408	5.7786	9.8422	10.917	6.6206	8.2705	8.4446	6.6948	Right	white	1.5
TCGA-CJ-4918-01A	64	4	4	1	0	T3a	1	1	93	8.3733	6.7571	11.2604	12.4034	5.1932	7.9276	8.4384	6.7349	Left	white	3.2
TCGA-B0-4823-01A	88	1	2	0	0	T1a	1	1	454	8.0259	7.3794	11.1208	12.4691	4.8021	7.9861	8.437	6.3322	Right	white	2
TCGA-CJ-4644-01A	48	4	3	1	0	T3a	0	1	336	8.229	7.1947	10.4319	11.561	5.408	7.8466	8.4303	6.2379	Left	white	2.8
TCGA-B8-5158-01A	56	3	4	0	1	T3a	1	0	1218	9.031	7.4287	11.1906	12.7663	7.9288	8.2551	8.4271	6.6016	Left	white	1.4
TCGA-BP-4986-01A	75	1	3	0	0	T1a	1	0	785	8.4106	7.3858	11.4126	12.974	6.9895	8.2544	8.4195	6.7118	Right	white	1.1
TCGA-B0-5097-01A	59	3	2	0	0	T3b	0	0	665	8.8242	7.4209	12.0478	12.4416	6.7695	8.0994	8.413	6.3242	Right	white	1.9
TCGA-CJ-4894-01A	58	3	3	0	0	T3a	1	1	841	6.9372	6.6448	10.3296	13.3036	5.553	8.3612	8.4089	7.2529	Left	white	2.8
TCGA-BP-4781-01A	78	1	3	0	X	T1a	1	0	2080	7.1853	6.2496	10.7264	12.3368	6.3919	8.0017	8.3999	6.131	Right	white	1.5
TCGA-CZ-4862-01A	46	1	2	0	X	T1b	1	0	3271	8.4471	7.6386	10.5115	12.6947	5.4479	8.2569	8.364	6.6621	Left	white	1.5
TCGA-B8-5550-01A	71	3	3	0	0	T3a	1	0	1476	8.1866	6.8909	10.9794	12.0303	5.2673	8.0422	8.3635	6.4737	Right	white	0.7
TCGA-BP-4770-01A	73	4	4	0	0	T4	0	1	329	9.3245	6.6785	11.9198	12.5689	2.6598	8.1976	8.3559	6.7704	Left	white	1.5
TCGA-B0-4703-01A	51	4	4	1	0	T3a	1	1	182	7.4625	6.9603	10.6076	12.1765	3.7224	7.9366	8.3496	6.3273	Left	white	2.4
TCGA-B8-4620-01A	70	3	2	0	0	T3a	0	0	777	8.246	6.6365	11.4446	12.9481	10.2025	7.8936	8.3367	6.1998	Left	white	0.8
TCGA-DV-5568-01A	26	1	2	0	X	T1a	1	0	370	8.2073	7.225	10.6745	11.5493	5.1675	7.927	8.3194	6.2431	Right	white	1
TCGA-BP-5201-01A	63	4	4	1	0	T3b	1	0	951	6.8082	6.5032	10.5099	11.6707	1.5567	8.4421	8.3177	6.6443	Left	white	1.6
TCGA-AK-3429-01A	54	2	2	0	0	T2	0	0	3328	8.3694	5.9327	10.2522	12.2258	4.4291	8.2158	8.3122	6.538	Right	white	1
TCGA-BP-4782-01A	55	1	2	0	X	T1a	0	0	354	7.169	6.1568	10.5423	12.1641	2.4383	7.9335	8.3118	6.371	Left	white	1.1
TCGA-B0-5706-01A	45	2	2	0	0	T2	1	0	3205	8.0309	6.9808	10.1198	11.9072	5.4733	7.769	8.3044	5.9494	Left	white	1
TCGA-BP-4797-01A	34	3	3	0	0	T3b	1	0	1107	8.2811	6.7617	10.8053	12.2972	7.1796	7.8041	8.2489	6.1071	Right	white	1.2
TCGA-BP-4971-01A	40	3	3	0	0	T3a	1	0	1487	7.9602	7.6052	10.5932	10.9471	3.723	8.3909	8.2412	6.675	Right	white	1.5
TCGA-BP-4992-01A	66	1	4	0	X	T1b	1	0	501	7.6067	7.6415	10.4643	11.4343	3.9343	8.6501	8.2371	7.6562	Left	white	1.5
TCGA-CJ-4903-01A	50	1	3	0	X	T1b	1	0	1560	8.6572	7.2356	11.108	12.4211	4.0057	7.8552	8.2189	6.7991	Left	white	3
TCGA-BP-5183-01A	57	3	3	0	X	T3a	1	0	1291	7.0477	6.6569	9.8876	11.9175	4.7382	7.9115	8.2184	6.372	Left	white	1.2
TCGA-BP-4970-01A	44	3	3	0	1	T1a	1	0	433	9.1647	7.9577	11.3753	13.9107	5.7872	7.6891	8.2111	6.3164	Right	asian	1.2
TCGA-BP-5196-01A	53	1	2	0	X	T1a	1	0	1018	6.9616	6.3917	10.5961	12.0648	1.5915	8.0154	8.2085	6.5977	Left	white	2.1
TCGA-A3-3329-01A	75	1	2	0	0	T1b	1	0	1624	7.8072	6.8664	10.5119	12.3387	6.1619	8.2878	8.1985	6.4911	Right	white	2
TCGA-AK-3431-01A	62	2	3	0	X	T2	0	1	2241	7.4094	5.6716	10.5761	11.4486	5.521	7.86	8.1974	6.1761	Right	white	0.9
TCGA-CJ-4893-01A	76	1	3	0	X	T1b	0	0	750	7.7637	6.6276	10.1764	13.207	5.6198	7.7718	8.1756	6.1301	Right	white	3.2
TCGA-BP-4169-01A	76	2	2	0	0	T2	0	1	701	8.9715	7.9604	11.7885	12.266	8.8453	7.9303	8.1755	6.3968	Right	white	2.5
TCGA-B0-4844-01A	60	4	3	1	X	T3a	1	1	313	6.4242	5.5401	9.7751	11.3575	5.6411	7.8228	8.1683	6.2434	Left	white	1.9
TCGA-B0-4813-01A	68	3	3	0	X	T3b	1	1	18	6.818	6.3839	10.0646	11.1078	6.0245	8.8495	8.1635	7.1582	Right	white	2.5
TCGA-A3-3316-01A	57	2	3	0	X	T2	1	0	1493	7.8299	7.5759	11.3151	12.2048	7.2417	8.0825	8.1495	6.7339	Left	white	1.7
TCGA-CJ-4875-01A	67	4	3	1	X	T3a	1	1	3554	6.9391	6.0347	9.46	11.4043	4.5376	8.3055	8.1475	6.882	Right	white	3.2
TCGA-CZ-5462-01A	83	4	3	1	X	T1b	1	1	311	7.3391	5.9978	10.3148	12.1237	8.9779	8.1562	8.1438	6.3561	Right	white	1.7
TCGA-BP-4162-01A	65	1	2	0	0	T1b	0	0	3074	7.3785	6.7998	10.5154	12.3316	6.8285	7.6784	8.1428	6.0886	Right	white	2
TCGA-B0-4838-01A	69	1	3	0	0	T1b	0	1	834	5.8378	6.2744	10.5085	12.13	5.5068	8.1619	8.1372	6.7404	Right	white	2
TCGA-B8-5545-01A	42	1	2	0	0	T1a	1	0	1525	7.9585	6.7668	11.0505	12.5128	7.044	7.9125	8.1273	6.4932	Left	black or african american	0.9
TCGA-B2-5635-01A	74	1	2	0	X	T1a	1	0	755	9.3986	8.2836	11.2878	13.4566	6.8908	8.1042	8.1248	6.8812	Right	white	1.6
TCGA-BP-4968-01A	40	1	3	0	0	T1b	1	0	1746	7.192	5.3325	10.1989	11.8633	3.972	7.9683	8.1142	6.5589	Right	white	1.5
TCGA-BP-4959-01A	49	1	3	0	X	T1b	1	0	2660	9.5972	7.9435	11.4405	11.4836	4.1269	7.904	8.1016	6.5854	Right	white	1.7
TCGA-DV-5565-01A	59	1	2	0	X	T1a	1	0	1329	6.6937	4.6762	10.6735	10.6656	4.3145	7.5945	8.0808	5.5492	Right	white	1.7
TCGA-CZ-5466-01A	67	3	2	0	X	T3a	1	0	685	9.8036	8.0387	10.8473	11.5659	2.9163	7.7724	8.0796	6.14	Right	not reported	1.6
TCGA-A3-3351-01A	42	2	2	0	0	T2a	1	0	910	8.2622	8.5437	11.4342	13.0511	6.0694	8.1733	8.0784	6.6746	Right	white	1.6
TCGA-AK-3451-01A	48	2	3	0	0	T2	1	0	2868	9.2062	6.4973	9.6438	9.4521	5.2484	7.7848	8.0682	5.9304	Left	white	1
TCGA-BP-4170-01A	72	1	2	0	0	T1b	0	1	2343	8.2021	6.6923	11.6381	12.5138	7.3954	7.7091	8.0642	6.1549	Left	white	1.7
TCGA-BP-5178-01A	71	4	4	1	X	T3a	1	1	1912	9.915	8.2829	12.4326	12.0491	4.4432	7.6504	8.0561	6.6576	Right	white	1.5
TCGA-BP-4330-01A	60	3	2	0	0	T3a	0	0	1888	7.4941	7.4865	10.5731	12.381	7.8608	7.8899	8.0395	6.3787	Left	black or african american	1.3
TCGA-CZ-5457-01A	62	3	4	0	X	T3a	1	0	2754	7.444	6.1112	10.7895	12.1484	6.474	7.9585	8.0023	6.9846	Right	white	1.5
TCGA-B0-5113-01A	69	3	2	0	0	T3a	0	0	1175	8.2817	8.2097	10.6452	12.1305	6.2436	7.7314	7.9941	6.2627	Right	white	2.3
TCGA-BP-4159-01A	70	1	2	0	0	T1b	1	1	2601	7.6961	5.3149	10.2434	12.2178	3.4589	7.7757	7.9911	6.2191	Right	white	1.4
TCGA-CZ-4865-01A	70	1	2	0	X	T1a	0	1	166	8.2959	6.334	11.0641	12.4011	5.6132	7.6291	7.9902	5.6348	Left	white	2
TCGA-BP-4338-01A	43	1	3	0	0	T1b	1	0	2859	7.7831	6.5778	10.9127	11.9751	5.0895	7.5209	7.9888	5.9321	Left	white	1.5
TCGA-B8-4148-01A	63	1	3	0	0	T1a	0	0	1520	6.7015	7.6393	10.5919	12.735	4.539	8.013	7.9816	6.5384	Left	white	0.8
TCGA-CJ-4635-01A	48	1	3	0	X	T1b	1	0	1416	7.8323	7.7137	10.5082	11.9436	4.8574	7.826	7.9766	6.2568	Left	white	4
TCGA-BP-5000-01A	40	1	3	0	X	T1b	1	0	563	7.9145	6.3967	10.5677	11.7487	4.3545	8.1138	7.9702	6.4941	Left	white	0.9
TCGA-CW-6097-01A	32	3	4	0	X	T3a	1	1	571	8.3984	6.9734	11.0248	12.3835	6.5376	7.5698	7.9699	5.7372	Left	white	1
TCGA-BP-4335-01A	65	4	3	1	0	T3a	0	1	475	7.1384	6.6789	10.1714	11.1837	2.6737	8.0933	7.966	6.1796	Left	white	1.6
TCGA-B0-4691-01A	55	4	3	1	0	T2	1	1	139	8.4115	6.9366	10.0821	11.4041	3.9069	7.7814	7.9542	6.1189	Left	white	1.8
TCGA-B0-5080-01A	63	4	3	1	0	T3a	1	1	342	7.7644	5.6692	10.4185	11.0943	4.2794	7.8508	7.9527	6.5106	Right	white	1.3
TCGA-CJ-4902-01A	61	3	3	0	X	T3a	1	0	1520	7.9193	6.9252	11.1711	12.0043	4.9211	7.5347	7.9391	6.1044	Right	white	3.4
TCGA-CZ-5469-01A	41	2	2	0	0	T2	1	1	946	8.2283	5.2915	9.9253	10.9034	3.2595	7.5278	7.9163	6.281	Left	white	1.8
TCGA-CZ-4866-01A	79	1	3	0	X	T1	0	0	3267	7.5464	6.7796	9.6547	12.0916	3.7138	7.6649	7.9137	6.0973	Right	white	1.9
TCGA-CJ-4874-01A	73	1	3	0	0	T1b	0	0	2283	8.7362	7.3189	10.6689	12.3319	5.1623	7.6489	7.8953	5.898	Left	white	3.2
TCGA-CJ-4920-01A	64	1	2	0	X	T1b	0	1	139	8.3816	7.1766	10.5599	12.2136	5.0926	8.0101	7.8923	6.994	Left	white	2.5
TCGA-A3-3382-01A	69	1	3	0	X	T1b	1	0	574	8.8866	7.5192	11.2341	12.5233	5.7891	7.7851	7.8761	6.0719	Left	white	1.1
TCGA-BP-4801-01A	57	1	2	0	X	T1a	1	0	1124	9.9422	8.268	11.3335	10.8295	4.5833	7.993	7.8566	6.3018	Left	white	2
TCGA-BP-4963-01A	63	1	3	0	X	T1b	1	0	1834	8.8883	8.1363	11.5825	12.2592	6.0737	7.7111	7.8543	6.4376	Left	white	1.2
TCGA-CZ-5984-01A	51	1	3	0	0	T1b	1	0	2067	9.2608	7.9151	10.8939	12.247	5.3903	7.5688	7.838	5.6495	Left	white	1.4
TCGA-BP-4331-01A	52	1	2	0	0	T1a	1	1	2454	7.5424	7.2134	10.3062	12.1321	7.1955	7.8942	7.8218	6.4296	Left	white	1.3
TCGA-CW-5590-01A	51	4	3	1	X	T3a	1	1	1075	6.6423	5.2352	10.5592	11.5587	3.8035	7.482	7.8213	5.7833	Right	white	1.2
TCGA-A3-3323-01A	53	1	1	0	X	T1b	1	0	1106	8.5873	8.63	11.103	12.6498	5.7933	7.7285	7.8082	6.2422	Right	white	1.5
TCGA-CJ-4889-01A	63	1	4	0	X	T1a	0	0	1946	9.155	7.7704	10.8738	12.0226	3.293	7.3943	7.8057	5.6657	Left	white	1.2
TCGA-BP-4762-01A	42	1	3	0	X	T1a	1	1	1343	8.4458	6.7164	10.8687	11.9083	6.0404	7.6135	7.7948	5.7997	Left	white	1.4
TCGA-A3-3363-01A	50	2	2	0	0	T2	1	0	319	9.5771	7.8546	10.5106	11.1559	6.5902	7.5827	7.7923	6.5852	Left	asian	1
TCGA-A3-3370-01A	48	1	2	0	0	T1b	0	0	2274	7.0614	7.2387	10.638	12.4245	6.4004	7.4582	7.7869	5.7744	Left	white	1
TCGA-B0-5698-01A	77	1	3	0	0	T1b	1	0	3631	9.2698	8.0862	11.3909	12.1561	7.2495	7.5852	7.7831	5.926	Right	black or african american	1.8
TCGA-BP-4981-01A	75	3	3	0	X	T3a	0	1	1097	7.6637	7.2424	10.7985	11.4966	2.0398	7.9475	7.7805	6.3001	Right	white	1.9
TCGA-CW-5580-01A	73	4	3	1	X	T3a	0	1	1964	8.3696	7.0276	10.8034	11.4367	6.0766	7.2462	7.7756	5.4675	Right	white	1.3
TCGA-CJ-4872-01A	51	1	4	0	0	T1b	1	0	1435	8.9068	7.383	11.128	11.4696	5.8633	7.8056	7.7736	6.6125	Right	white	2.2
TCGA-CJ-4886-01A	42	1	3	0	X	T1a	0	0	1952	8.0058	5.9386	10.3279	12.0065	4.467	7.549	7.7695	5.9474	Left	white	2.2
TCGA-B4-5835-01A	64	1	2	0	0	T1	0	0	16	8.0587	5.7156	10.1071	10.9977	3.8422	7.406	7.7649	5.8277	Left	white	1.4
TCGA-CJ-4643-01A	67	2	3	0	0	T2b	0	0	1793	7.8918	7.1075	11.2093	11.6875	4.9911	7.5589	7.7544	6.2208	Right	white	2.5
TCGA-B0-4833-01A	82	1	2	0	0	T1b	0	1	2386	6.836	6.2206	9.944	11.4864	4.8007	8.1191	7.7332	5.9639	Left	white	1.5
TCGA-B0-5102-01A	74	1	3	0	X	T1	0	1	2764	7.8493	6.3368	10.1767	11.4932	3.5385	7.507	7.7323	5.9747	Left	white	1.5
TCGA-A3-3383-01A	52	1	2	0	X	T1	1	0	861	9.4741	7.0522	10.7235	11.8718	6.711	8.2129	7.7297	6.7761	Left	white	1.4
TCGA-B0-4846-01A	52	4	2	1	0	T3a	1	1	1200	6.7944	6.7482	10.6042	12.0921	6.7622	7.4675	7.7297	6.1465	Right	white	1.5
TCGA-BP-5195-01A	75	1	2	0	X	T1a	1	0	749	8.1668	7.0984	11.1056	12.7066	7.7043	7.4591	7.7248	5.6504	Left	white	1.4
TCGA-BP-5200-01A	44	2	4	0	X	T2	1	0	1063	8.223	7.0414	10.9926	11.9966	7.7827	7.5759	7.72	6.3575	Right	white	2.2
TCGA-A3-3374-01A	51	1	2	0	0	T1b	0	0	1314	9.5258	7.6061	11.0681	9.7367	5.7021	7.2823	7.7155	6.0539	Right	black or african american	1.2
TCGA-B0-4816-01A	49	2	3	0	0	T2	1	1	1371	9.8232	8.834	12.1242	13.1788	7.1505	7.3719	7.7143	6.0943	Left	white	2.7
TCGA-B0-4817-01A	81	3	3	0	0	T3c	1	1	1019	7.9905	6.4131	10.9184	11.2436	12.4566	7.9013	7.7134	6.1148	Right	white	2.6
TCGA-BP-5010-01A	63	3	4	0	0	T3a	1	1	878	6.8966	6.7427	9.9392	10.5942	4.6845	7.9338	7.7029	5.993	Right	white	1.5
TCGA-A3-3357-01A	62	2	3	0	0	T2	1	0	2688	6.9595	6.3822	10.8393	12.4825	6.9634	7.2462	7.7019	5.4277	Right	white	1.2
TCGA-A3-3311-01A	57	1	2	0	X	T1	1	1	1191	6.715	6.5085	10.6755	12.5382	6.6349	7.8628	7.6963	6.5807	Right	not reported	1.7
TCGA-BP-5180-01A	53	1	2	0	X	T1a	1	0	2263	8.908	7.1326	10.8418	12.0649	4.5304	7.3561	7.691	5.6375	Right	white	1.6
TCGA-CJ-5684-01A	61	3	2	0	X	T3a	1	0	2231	6.8458	5.6249	10.3158	11.3493	2.8163	7.4516	7.687	5.749	Right	white	3
TCGA-CZ-4854-01A	68	1	2	0	0	T1b	1	1	1404	6.2411	6.1394	9.8521	11.5514	4.7799	7.4775	7.685	6.3621	Right	white	1.7
TCGA-BP-4329-01A	75	3	2	0	0	T3a	1	1	845	9.0951	7.5601	10.9233	11.4323	5.4616	7.3869	7.6763	5.5773	Right	white	1.2
TCGA-BP-4803-01A	79	3	3	0	X	T3a	1	0	204	8.239	6.62	10.268	11.4823	2.3648	7.0804	7.6725	5.7503	Right	white	1
TCGA-B0-4701-01A	66	4	3	1	0	T3a	0	1	238	8.841	7.8814	10.8073	10.7628	5.3369	7.9303	7.6699	6.3189	Left	white	2.2
TCGA-CJ-4871-01A	63	4	4	1	X	T3a	1	0	2423	7.4461	5.6577	10.1346	12.1833	4.7179	7.2011	7.6664	5.5198	Left	white	3.3
TCGA-A3-3317-01A	67	2	2	0	0	T2	1	0	1491	7.634	7.5513	10.5122	11.6724	3.3001	7.4876	7.6657	6.1359	Left	not reported	1.5
TCGA-BP-4998-01A	49	1	3	0	X	T1a	1	0	932	9.8423	8.5646	11.3131	12.4131	6.7387	7.3841	7.6556	5.8527	Right	asian	1.6
TCGA-B8-4622-01A	57	4	3	1	0	T3a	1	0	1525	8.9662	7.7719	10.9199	12.2958	6.9473	7.7719	7.6403	6.6815	Left	white	1.5
TCGA-AK-3456-01A	48	2	3	0	0	T2	1	0	1143	8.7418	6.9836	10.107	10.8438	6.5984	7.1585	7.6382	5.642	Right	black or african american	1
TCGA-CZ-5463-01A	76	2	2	0	X	T2	1	0	662	7.1302	6.4221	10.3425	11.741	5.9148	6.8385	7.638	5.8125	Left	white	1.4
TCGA-B8-4621-01A	63	1	3	0	0	T1b	1	0	788	9.3593	7.8692	10.5235	10.9327	8.2463	6.8914	7.6298	5.2867	Left	black or african american	1.1
TCGA-CZ-5460-01A	55	4	2	1	X	T3b	1	0	2873	8.4184	6.5311	10.5631	11.3492	6.8123	7.2824	7.6288	5.5249	Right	white	1.1
TCGA-B0-5120-01A	72	1	2	0	0	T1a	0	0	1169	8.3964	7.4054	11.4294	12.0281	3.7338	7.4117	7.6284	6.6411	Left	white	0.7
TCGA-B0-5084-01A	33	4	3	1	1	T3a	1	1	222	7.1717	5.3044	10.3465	10.9928	8.9345	7.8538	7.6255	6.0691	Right	white	1.3
TCGA-CW-5589-01A	52	1	2	0	X	T1a	1	0	2378	8.9403	7.3211	10.7617	11.7015	4.4862	7.4599	7.6255	5.7029	Left	white	1.1
TCGA-EU-5905-01A	67	1	3	0	X	T1	0	0	119	8.2803	6.9229	10.9658	11.8075	4.9797	7.5693	7.6066	5.9567	Right	white	2.4
TCGA-BP-4790-01A	76	1	2	0	X	T1a	1	1	1111	8.3996	6.8442	10.7979	11.2604	4.0381	6.7317	7.6056	5.5353	Right	white	1.3
TCGA-CW-5584-01A	74	3	3	0	1	T3b	1	1	164	8.0928	6.5858	10.8655	11.9361	4.2632	7.2576	7.6034	5.4531	Right	white	1.3
TCGA-B2-4101-01A	52	2	3	0	X	T2a	1	0	648	9.1035	8.178	10.5503	12.0953	7.2453	7.4776	7.5965	5.8304	Left	white	2
TCGA-B8-4154-01A	73	1	2	0	0	T1a	0	0	1380	8.5548	6.8712	10.7037	12.0286	6.1712	7.4423	7.5944	5.3807	Left	white	1
TCGA-CZ-5467-01A	86	3	4	0	0	T3a	0	1	73	8.4434	6.2954	10.7962	11.5917	0.9988	7.0238	7.5877	5.7437	Right	white	1.7
TCGA-DV-5569-01A	29	1	2	0	X	T1a	0	0	355	7.8357	6.171	10.9862	11.8613	5.704	7.1946	7.5848	5.596	Right	white	1.1
TCGA-B4-5836-01A	61	1	2	0	0	T1b	0	0	141	7.5498	6.2457	10.3782	11.8162	7.9245	8.0201	7.5598	6.8599	Right	white	1.7
TCGA-AK-3428-01A	62	3	2	0	0	T3b	1	0	3728	6.9733	5.1422	10.4693	11.0176	7.4074	7.6072	7.5327	6.0318	Left	white	1.2
TCGA-B2-5639-01A	46	4	3	1	X	T3	1	1	1003	8.6546	7.1269	10.7251	11.783	6.3291	6.8421	7.5299	5.1135	Left	white	2
TCGA-B0-4836-01A	61	4	3	1	X	T3b	1	1	1238	6.6782	5.6847	9.5015	10.427	6.3389	7.1289	7.5274	5.4745	Right	white	1.7
TCGA-A3-3324-01A	51	1	3	0	X	T1b	1	0	1186	7.5055	7.0604	10.5455	12.0363	5.6113	7.2774	7.522	5.3521	Right	white	1.9
TCGA-B2-5633-01A	56	1	2	0	0	T1b	1	0	963	8.0128	6.7586	11.0211	12.0036	5.8888	7.215	7.516	5.2983	Right	white	1.3
TCGA-DV-5575-01A	52	1	2	0	X	T1a	0	0	1729	8.0389	6.6003	11.0313	11.6082	4.1339	7.3871	7.5134	5.8402	Left	white	2
TCGA-B0-5694-01A	71	3	3	0	0	T3a	1	1	480	8.4408	6.7286	10.3979	11.6215	5.8257	7.2248	7.5084	5.7343	Left	white	2.5
TCGA-CJ-4882-01A	57	3	3	0	X	T3a	1	0	1883	8.6905	7.1125	10.8505	11.2906	4.7772	7.9194	7.502	6.1092	Right	black or african american	3.5
TCGA-B0-5095-01A	81	3	3	0	0	T3a	1	1	245	7.6743	7.0825	10.5199	11.5397	5.6082	7.5049	7.454	6.2323	Right	white	1.7
TCGA-BP-4342-01A	79	2	3	0	0	T2	1	1	2256	6.6548	7.1456	10.5646	11.5602	5.0423	7.6854	7.4508	5.7989	Left	white	1.9
TCGA-CJ-4899-01A	42	1	2	0	X	T1b	1	0	1528	8.3174	7.3768	10.8815	11.1087	3.1675	7.3768	7.4466	6.1761	Left	asian	2.3
TCGA-CZ-4856-01A	62	1	2	0	0	T1b	0	0	18	8.8433	7.3752	10.6976	11.5596	4.6718	7.0337	7.442	5.5566	Left	white	1.5
TCGA-B0-5088-01A	53	1	3	0	0	T1b	1	1	563	9.7479	8.0057	10.6647	10.6175	4.4584	7.4479	7.4384	6.3888	Right	white	1.6
TCGA-CJ-6033-01A	54	4	4	1	0	T3a	0	1	224	8.5932	6.8166	10.7815	11.8506	4.438	8.5196	7.4249	7.0713	Right	white	3
TCGA-B2-4102-01A	61	1	2	0	X	T1b	1	0	952	8.8528	8.2755	10.6533	12.6428	7.7175	7.3807	7.4112	6.0641	Right	white	1.7
TCGA-BP-4964-01A	54	1	2	0	0	T1a	0	0	1862	7.6934	6.5611	10.1771	11.3812	0.7214	7.1541	7.4066	5.6619	Right	white	1.6
TCGA-A3-3349-01A	34	1	2	0	0	T1b	0	0	1385	6.6857	5.6424	10.9723	11.2175	6.8815	7.0929	7.3964	5.2408	Left	white	1.3
TCGA-B0-4713-01A	76	3	2	0	X	T3b	0	1	202	5.2224	5.7858	8.8887	10.6812	4.9101	7.3058	7.3821	6.0531	Right	white	1.4
TCGA-A3-3307-01A	66	3	3	0	0	T3b	1	0	1436	7.3194	6.6906	10.7011	11.8688	7.0007	7.3722	7.3802	6.0171	Right	not reported	1
TCGA-BP-4799-01A	70	3	3	0	0	T3b	1	1	1133	7.63	5.0991	10.1669	10.9649	4.2896	7.7247	7.3759	6.2209	Right	white	1
TCGA-B0-4841-01A	63	4	3	1	X	T2	1	1	204	6.3282	3.6632	9.2612	10.7113	2.5027	7.0663	7.3709	5.1226	Left	white	0.7
TCGA-B0-5701-01A	65	3	4	0	0	T3b	1	0	2461	8.0403	6.1675	9.8804	10.9897	5.5568	6.7378	7.3681	4.6897	Left	white	1.4
TCGA-CJ-4892-01A	65	1	2	0	0	T1b	0	0	1521	6.2907	6.667	9.7523	12.0298	6.3881	7.7384	7.3572	6.3305	Right	white	3.1
TCGA-A3-3359-01A	82	1	2	0	0	T1a	0	0	2504	7.8243	7.8529	10.8552	12.0941	7.4771	7.0488	7.3546	5.4309	Left	white	1
TCGA-B8-5553-01A	67	1	2	0	0	T1b	0	0	435	8.6776	7.9053	10.8055	12.2669	7.2662	7.3211	7.3511	5.3009	Left	white	1.1
TCGA-BP-5185-01A	56	1	3	0	X	T1a	1	0	1132	6.7754	4.4041	9.5346	10.4309	3.7536	7.2092	7.3433	5.801	Right	white	1.8
TCGA-BP-4327-01A	75	2	2	0	0	T2	0	1	109	7.9522	6.5301	10.5201	10.9172	1.8429	7.7093	7.3421	6.2889	Right	white	1.8
TCGA-BP-4325-01A	64	1	2	0	0	T1b	0	0	2964	6.5453	6.9431	9.9928	12.0455	6.2461	7.5754	7.335	6.8559	Left	white	1.2
TCGA-BP-4977-01A	57	1	3	0	X	T1b	1	0	454	7.8321	7.3461	10.8681	11.6407	5.1223	7.0098	7.3322	5.5715	Left	white	1.5
TCGA-CZ-5461-01A	52	4	4	1	X	T1b	1	1	330	8.689	7.0179	11.1698	12.8945	5.5639	7.2736	7.3269	5.9323	Right	white	1.1
TCGA-BP-4967-01A	76	3	2	0	0	T3a	1	0	205	7.7461	7.0694	10.4148	11.4223	4.7627	6.9159	7.3114	5.3356	Right	white	1.7
TCGA-CJ-4634-01A	60	1	2	0	X	T1b	0	0	3498	8.0137	6.6239	10.1924	12.1243	4.5597	7.4431	7.3103	5.9737	Right	white	3.2
TCGA-B0-5696-01A	69	3	4	0	0	T3a	1	0	2609	6.1094	5.2087	10.0659	11.1752	5.0157	7.1213	7.2917	5.0626	Right	white	1.2
TCGA-DV-5566-01A	67	1	2	0	X	T1a	0	0	1398	5.6731	4.4208	10.0404	10.7906	4.8868	7.3289	7.2871	5.0734	Right	white	1
TCGA-A3-3308-01A	77	3	2	0	0	T3b	0	0	16	7.5167	6.9429	10.4814	11.655	4.7383	7.1103	7.2859	5.3382	Right	white	1.2
TCGA-B0-5110-01A	71	1	2	0	0	T1a	0	0	2009	7.2991	6.5003	10.1328	11.1235	6.8402	7.4624	7.2854	5.9292	Right	white	1.6
TCGA-CJ-4904-01A	60	4	3	1	0	T3a	0	0	3302	7.0039	5.2995	10.5841	11.0545	4.4255	6.7214	7.2596	5.2414	Left	white	3
TCGA-BP-4344-01A	75	1	2	0	X	T1a	0	0	1666	8.3229	7.1353	10.2569	11.6807	3.7326	7.3185	7.2524	5.387	Right	white	1.3
TCGA-A3-3343-01A	79	2	3	0	0	T2	1	0	945	8.6977	7.4669	10.8237	11.5404	6.3846	6.9988	7.2381	5.3453	Left	white	1.3
TCGA-BP-5006-01A	61	1	2	0	0	T1a	1	0	840	7.1035	6.0211	10.4513	11.1671	6.0211	6.9328	7.2195	5.2268	Left	white	0.8
TCGA-BP-4982-01A	42	1	3	0	X	T1b	1	0	1014	7.1116	7.3794	10.6909	12.1602	6.4993	6.9168	7.2195	5.5855	Left	white	1.3
TCGA-CJ-5680-01A	65	4	4	1	X	T3a	0	1	768	7.1126	5.5555	10.2838	11.7087	5.7172	6.9512	7.2177	4.9698	Right	white	3.1
TCGA-CZ-5989-01A	60	2	2	0	0	T2	1	0	1905	7.3021	5.2088	10.8659	12.6732	4.2267	7.5743	7.2109	4.9577	Right	white	1.9
TCGA-CJ-4908-01A	38	1	2	0	X	T1a	1	0	1531	7.0502	6.8152	10.34	11.468	2.5621	6.8653	7.2108	5.9967	Right	white	2.6
TCGA-BP-5174-01A	45	1	2	0	X	T1a	0	0	2257	7.0485	4.8856	8.8404	10.2329	1.1532	6.7204	7.1963	5.5578	Left	white	1
TCGA-B0-5085-01A	76	3	3	0	0	T3a	0	1	770	6.9732	6.1485	9.7576	10.317	2.6031	8.0679	7.1949	6.9667	Left	white	1.5
TCGA-BP-4985-01A	72	3	4	0	0	T3a	1	1	952	7.215	5.4502	10.3182	11.2113	7.1612	6.9096	7.1922	5.1043	Left	white	1.2
TCGA-B0-4811-01A	48	3	3	0	0	T3a	1	1	1417	7.1566	5.9066	10.4667	10.3545	5.2226	7.0344	7.1829	5.6584	Left	white	1.7
TCGA-B0-5705-01A	65	1	2	0	0	T1	0	0	4537	6.3535	5.3913	10.1351	11.5005	6.0754	6.7642	7.1739	5.115	Left	white	2.1
TCGA-BP-5173-01A	75	1	2	0	X	T1a	1	1	62	6.0737	5.0072	9.7357	11.1752	4.8139	7.3029	7.1733	6.1352	Right	white	0.6
TCGA-AK-3434-01A	72	1	2	0	X	T1b	1	0	2087	3.7452	4.3745	9.4843	11.033	5.3393	7.4721	7.1726	4.752	Right	white	1
TCGA-BP-4988-01A	72	1	2	0	0	T1a	1	1	828	9.3663	8.5813	10.3617	11.429	4.6148	7.9244	7.1592	6.9001	Right	white	1.5
TCGA-B4-5377-01A	68	4	3	1	0	T3	0	0	365	7.3785	6.4002	10.2633	11.9917	5.3152	6.9157	7.1577	5.3604	Right	white	1.3
TCGA-CJ-4907-01A	58	3	3	0	X	T3b	1	0	1499	7.5243	6.3853	10.5827	11.5043	5.3645	6.7519	7.1559	5.3971	Right	white	2.2
TCGA-BP-4166-01A	69	3	3	0	0	T3a	1	0	13	7.2745	5.779	10.6926	11.5216	5.2894	6.6029	7.1526	5.3727	Left	white	1.6
TCGA-BP-4975-01A	40	1	3	0	X	T1b	1	0	1433	7.79	6.4103	10.4144	11.5623	6.5225	7.1195	7.1507	5.4939	Right	white	1.6
TCGA-B0-4837-01A	63	1	3	0	0	T1b	1	1	1378	5.7494	5.0302	9.6876	11.3649	6.368	7.3884	7.146	5.4181	Left	white	1.5
TCGA-CJ-4878-01A	71	3	2	0	X	T3a	0	0	2186	6.7654	5.6138	9.8317	10.2679	5.6788	6.8454	7.1275	5.953	Left	white	2.5
TCGA-CJ-4912-01A	61	2	3	0	X	T2	1	0	1657	7.9193	6.4978	9.7374	10.9079	5.0073	6.897	7.1145	5.2495	Left	white	3.1
TCGA-A3-3331-01A	86	1	2	0	0	T1	0	0	1257	7.5272	7.2611	10.904	11.7636	7.5646	7.0694	7.0969	5.5228	Right	white	1
TCGA-AK-3460-01A	58	1	2	0	X	T1a	1	0	2508	8.7203	7.2254	10.4527	11.3598	4.7441	6.8715	7.0824	5.5185	Right	white	1
TCGA-BP-4761-01A	57	3	4	0	1	T3a	1	0	182	7.5437	4.6154	9.056	10.6076	4.427	7.8048	7.0756	5.8955	Right	white	1.3
TCGA-EU-5906-01A	55	1	2	0	X	T1b	1	0	206	8.5013	7.6304	10.6678	11.588	8.0702	6.6513	7.0755	4.9025	Left	white	1.3
TCGA-A3-3326-01A	47	1	1	0	X	T1a	1	0	1137	8.5655	7.5306	10.1221	11.0247	7.1945	6.7677	7.0723	5.4595	Right	white	1.3
TCGA-B0-5402-01A	64	4	4	0	X	T4	1	0	1290	5.4688	4.414	9.5413	10.786	5.7938	6.8375	7.0512	5.3065	Left	white	1.6
TCGA-B8-5549-01A	53	1	3	0	0	T1b	1	0	194	6.0557	5.5079	10.5961	12.0966	6.472	6.6001	7.0493	4.8175	Right	white	0.9
TCGA-BP-4326-01A	53	1	2	0	0	T1b	0	1	1625	6.7028	6.4953	10.8119	11.5421	7.1776	6.7375	7.0452	5.3635	Left	white	2
TCGA-A3-3373-01A	54	1	3	0	0	T1b	0	0	1621	8.9431	7.5327	10.5186	10.708	6.4445	6.853	6.9984	5.8795	Right	white	0.6
TCGA-B0-4693-01A	72	3	4	0	0	T3a	0	1	77	7.727	6.9224	10.4886	11.7991	6.7795	6.6475	6.9966	4.853	Left	white	1.6
TCGA-B0-4849-01A	51	3	3	0	X	T3a	1	1	69	8.0199	7.4501	10.9255	11.7212	6.07	6.8646	6.9781	5.7624	Left	white	1
TCGA-BP-4334-01A	56	3	3	0	0	T3a	1	1	645	3.6989	3.2573	9.0219	9.6373	4.6909	6.9871	6.9772	5.3357	Right	white	1.6
TCGA-B0-5710-01A	57	1	2	0	0	T1b	1	0	2430	7.1458	6.1306	10.0376	11.1157	3.9899	6.677	6.976	5.2563	Right	white	1.3
TCGA-BP-5008-01A	46	1	2	0	X	T1a	1	0	1071	7.4309	6.2645	10.6461	11.2163	8.3143	6.8413	6.9745	5.9232	Right	white	1.1
TCGA-A3-3372-01A	64	3	2	0	X	T3	1	0	735	6.216	6.8273	10.4064	12.0683	6.8186	6.6525	6.9715	5.1338	Left	white	1.1
TCGA-B0-5712-01A	68	4	3	1	0	T2	0	0	2722	6.6367	4.8039	9.2984	10.3078	1.9824	6.6632	6.9482	5.0486	Left	black or african american	1.7
TCGA-CZ-5987-01A	60	4	2	1	X	T3b	1	1	445	7.5574	6.7093	11.1581	12.2288	6.528	6.5807	6.912	5.0851	Right	white	1.5
TCGA-BP-5190-01A	61	1	3	0	X	T1a	1	0	1011	7.1777	5.6527	10.2574	10.6184	3.7487	6.6383	6.9056	5.2946	Right	white	1.3
TCGA-B0-5707-01A	39	1	3	0	0	T1a	0	0	3744	8.8788	6.7435	9.3247	9.843	6.0926	6.5125	6.9025	4.5883	Right	white	2
TCGA-B0-5812-01A	53	1	3	0	X	T1b	1	0	3834	7.8001	6.2897	10.3321	11.5382	5.9813	7.2341	6.9004	5.4552	Right	white	1
TCGA-EU-5907-01A	81	3	3	0	X	T3a	1	0	127	6.2159	4.9179	10.16	11.0484	3.1197	6.931	6.9002	4.9896	Right	white	2
TCGA-CJ-5683-01A	78	1	3	0	X	T1b	1	0	1889	6.8483	5.2665	10.3656	11.2	3.9839	6.539	6.8966	4.6172	Right	white	2.5
TCGA-CJ-4897-01A	79	3	3	0	X	T3a	0	0	3341	6.361	5.2435	10.2673	11.1951	4.4914	6.507	6.8892	4.5416	Right	white	3.4
TCGA-A3-3306-01A	67	1	3	0	0	T1b	1	0	1120	7.5008	7.0885	10.0983	11.2657	6.7005	6.8504	6.8824	5.3524	Left	white	0.9
TCGA-BP-4973-01A	47	3	3	0	X	T3a	1	0	1384	6.6092	7.0413	10.7306	11.8109	6.8607	6.3893	6.8676	4.9867	Right	white	1.5
TCGA-B0-5077-01A	77	1	3	0	0	T1a	1	1	1317	5.6076	5.8677	9.4556	11.1716	4.8016	6.4073	6.8602	4.553	Left	white	1.1
TCGA-BP-5176-01A	78	1	2	0	X	T1a	0	1	1590	7.4158	5.3915	9.6562	11.0136	1.5613	6.8993	6.8595	4.9804	Left	white	1.6
TCGA-A3-3335-01A	41	2	4	0	0	T2a	1	0	1886	8.3122	7.3091	10.5938	11.7095	7.1858	6.3182	6.8454	4.7315	Right	white	1.1
TCGA-CZ-5459-01A	63	3	3	0	X	T3b	1	0	1683	7.101	6.5034	10.3807	10.7606	5.7642	6.3912	6.8451	4.7905	Right	white	0.4
TCGA-B0-5094-01A	62	4	2	1	0	T3b	1	1	333	5.9242	5.8623	9.5284	11.3466	6.2133	7.1417	6.8315	6.1257	Left	white	1.3
TCGA-BP-4759-01A	50	1	2	0	X	T1a	1	0	2372	7.0742	6.9918	10.5196	10.0878	5.0687	6.4757	6.8283	4.6803	Left	white	1.1
TCGA-B0-4821-01A	68	3	3	0	0	T3b	0	1	1230	6.4915	3.5391	8.3445	9.3244	2.4401	6.7566	6.8145	4.9793	Left	asian	1.5
TCGA-B2-5636-01A	79	1	2	0	X	T1a	1	0	919	6.8218	5.3786	10.0705	11.0431	6.5736	6.348	6.7978	4.3745	Right	white	1.3
TCGA-CZ-4853-01A	82	1	2	0	X	T1a	1	0	774	6.3271	6.0208	9.5947	11.0526	4.7074	6.4427	6.7943	4.9351	Right	white	2
TCGA-BP-5202-01A	75	3	2	0	X	T3a	1	0	29	6.0359	5.5223	9.5337	11.3619	3.7869	6.7732	6.7811	5.0513	Right	white	0.9
TCGA-BP-4965-01A	46	1	2	0	X	T1a	1	0	1871	7.105	5.8843	10.6856	12.0275	6.7398	6.482	6.777	5.6565	Left	white	1
TCGA-BP-4766-01A	43	1	3	0	X	T1a	0	0	1462	7.096	6.5979	10.4128	11.1869	7.4848	6.3004	6.7642	4.878	Right	white	1.5
TCGA-BP-4993-01A	58	1	3	0	X	T1a	1	0	177	7.312	5.9156	10.1687	11.0869	4.0729	6.8402	6.7634	5.4895	Left	white	1.6
TCGA-B0-4818-01A	68	2	3	0	X	T2	0	1	510	7.3163	6.5584	10.3609	11.7073	7.9651	6.8432	6.7631	6.0171	Right	white	1.6
TCGA-CJ-4885-01A	64	4	3	1	X	T3a	1	0	3451	6.7951	4.7267	9.9789	11.1805	4.7648	7.4694	6.7482	5.6184	Right	white	3.5
TCGA-BP-4776-01A	52	1	2	0	X	T1a	1	0	411	7.6275	6.3393	9.772	10.227	3.8527	7.1481	6.7436	5.9674	Left	white	1.5
TCGA-AK-3455-01A	71	3	3	0	X	T3b	0	1	683	7.2468	6.3037	9.1435	10.451	5.8017	6.2431	6.7387	5.3218	Right	white	0.8
TCGA-CJ-5682-01A	60	4	4	1	X	T3a	1	0	3736	6.482	4.1216	10.318	11.095	5.7948	6.3289	6.7323	4.6021	Left	white	2
TCGA-CJ-6032-01A	63	2	3	0	X	T2	0	0	3639	7.0351	5.2642	9.6778	11.0992	3.592	6.5976	6.7229	5.1536	Right	white	3.2
TCGA-B0-5100-01A	72	3	3	0	X	T3a	1	1	1913	4.5691	2.4485	9.2569	9.9711	6.36	7.1531	6.7003	5.7563	Right	black or african american	1.2
TCGA-B0-4852-01A	78	2	2	0	0	T2	0	1	1121	7.7874	6.726	10.2116	11.0545	6.9634	7.0584	6.6754	6.1868	Left	white	2
TCGA-CJ-5679-01A	73	3	4	0	X	T3b	1	1	679	6.6624	4.7045	9.3559	9.7799	3.7274	5.9594	6.6706	4.4966	Left	white	2.6
TCGA-B0-5691-01A	66	1	3	0	0	T1a	0	0	3431	7.3656	6.3057	10.6782	10.6001	6.2443	6.7436	6.6676	4.5578	Left	white	1.4
TCGA-B0-5121-01A	56	1	2	0	0	T1b	1	0	1485	7.5386	6.205	10.2599	11.0192	6.8112	7.0064	6.6667	5.2409	Right	white	1.2
TCGA-A3-3367-01A	72	1	3	0	0	T1b	1	0	2270	9.186	7.9641	10.9746	11.3377	6.1729	6.6753	6.6579	4.8067	Left	white	1
TCGA-BP-4961-01A	47	1	2	0	X	T1a	1	0	1935	5.8528	4.9751	10.2251	10.9498	5.2071	6.1036	6.6444	4.5203	Right	white	1.6
TCGA-B0-5711-01A	50	3	3	0	X	T3b	1	0	3989	8.1131	6.4284	10.2081	10.9275	5.6669	6.5201	6.6322	5.2646	Right	white	2.5
TCGA-CZ-5451-01A	74	2	3	0	0	T2	1	0	1929	6.7475	5.3697	10.2547	10.749	5.2928	6.6085	6.6274	5.0896	Left	white	1.5
TCGA-BP-5181-01A	58	1	2	0	X	T1b	0	0	1495	6.1155	5.0746	9.9773	11.0811	5.7911	6.2399	6.6253	4.7397	Left	white	1.8
TCGA-BP-4332-01A	36	3	2	0	0	T3a	1	0	1133	6.8315	4.9704	9.9421	10.3754	3.9481	6.3908	6.6249	5.54	Left	white	1.9
TCGA-CJ-4639-01A	49	2	2	0	0	T2	0	0	3229	7.0893	6.3217	9.848	11.2376	3.6646	6.8735	6.6116	5.5598	Left	white	3.2
TCGA-BP-5194-01A	39	1	2	0	X	T1a	1	0	408	7.2825	5.7611	9.7453	11.05	4.8791	6.3933	6.6105	4.7204	Right	white	1.9
TCGA-A3-3325-01A	52	1	2	0	X	T1a	1	1	1170	9.3293	7.9503	11.0998	11.2363	6.3614	6.5624	6.6103	5.6407	Right	white	2
TCGA-CJ-4870-01A	58	3	2	0	X	T3a	0	0	1498	6.5534	4.9155	9.7605	10.6284	6.1685	6.5326	6.6009	4.9368	Left	black or african american	3
TCGA-B0-5399-01A	46	1	2	0	0	T1b	1	0	1411	8.3477	6.7446	10.346	9.4205	3.4614	6.5871	6.5977	4.9563	Right	white	2.1
TCGA-BP-4987-01A	41	1	2	0	X	T1b	0	0	1124	6.1742	6.6012	10.0145	11.4694	6.1364	6.8235	6.5962	5.394	Left	asian	2
TCGA-B8-5165-01A	43	1	2	0	0	T1a	1	0	737	6.2279	4.8117	10.1989	10.5718	6.6686	6.2161	6.5933	4.3982	Right	white	1.2
TCGA-BP-4991-01A	54	1	2	0	X	T1a	1	0	1413	7.1034	6.6392	10.6887	11.2337	7.261	6.739	6.5922	5.365	Right	white	1.3
TCGA-B0-5700-01A	77	1	2	0	0	T1a	1	0	1790	7.2664	5.8418	9.9464	10.4922	4.5501	6.4847	6.5918	4.2781	Left	white	1.7
TCGA-BP-4349-01A	68	1	2	0	X	T1a	0	0	372	6.597	6.9003	9.9603	10.8325	3.075	6.9661	6.5913	5.6008	Left	white	1.5
TCGA-B0-5699-01A	53	1	2	0	0	T1	1	0	3841	7.4525	6.5883	10.146	10.8669	6.2688	6.3772	6.5776	4.8023	Left	white	1.2
TCGA-BP-4775-01A	55	1	2	0	X	T1a	0	0	1843	7.0012	6.6269	9.8536	10.6077	7.3899	6.6763	6.5756	5.046	Left	white	0.8
TCGA-BP-5004-01A	53	1	3	0	X	T1a	1	0	1126	6.1319	5.4661	10.2222	11.0336	4.6339	6.4323	6.5579	5.1734	Right	white	1.4
TCGA-BP-4995-01A	68	1	3	0	0	T1b	1	0	1371	6.3836	5.5084	10.3468	10.9048	6.5008	6.2259	6.546	4.6642	Right	white	1.3
TCGA-CZ-5988-01A	38	1	2	0	0	T1b	1	0	693	5.3754	4.52	9.9523	11.2503	3.9132	6.6114	6.5434	5.253	Right	white	1.5
TCGA-B0-4710-01A	75	3	3	0	0	T3a	0	0	1755	7.6907	6.9851	9.974	10.6855	7.4421	6.5206	6.5375	5.2771	Right	white	2
TCGA-BP-4165-01A	64	1	1	0	0	T1b	0	0	3037	5.6314	5.3058	9.3161	11.0499	3.9562	7.0133	6.5335	5.4615	Right	white	1.1
TCGA-A3-3352-01A	74	3	3	0	0	T3a	1	1	561	7.7195	6.4864	10.414	11.3233	5.2974	6.4447	6.5266	4.3518	Left	white	0.7
TCGA-B0-5690-01A	53	1	1	0	X	T1b	0	0	3392	6.3436	5.9697	9.5911	11.0651	4.6311	6.2164	6.525	4.559	Right	white	1.5
TCGA-BP-4352-01A	74	4	4	1	0	T3b	0	1	344	5.9353	4.3457	8.1935	9.2783	1.2129	6.8151	6.5228	5.0854	Right	white	1.6
TCGA-BP-5001-01A	43	1	2	0	X	T1b	0	0	1177	5.7961	6.3285	9.5091	9.819	2.8969	7.0601	6.5197	5.5586	Right	white	1.5
TCGA-AK-3450-01A	85	1	2	0	0	T1a	0	0	1508	7.133	5.2908	9.9663	10.0483	4.0431	5.923	6.518	4.4936	Right	white	0.9
TCGA-A3-3362-01A	60	1	2	0	0	T1a	0	0	1559	7.1045	6.5247	10.5846	11.2586	7.031	6.3665	6.5104	4.728	Left	white	1.2
TCGA-B0-4814-01A	58	4	3	1	0	T4	1	1	168	7.6213	6.3741	9.4203	10.9454	5.9249	6.3289	6.5087	5.0448	Right	white	2.5
TCGA-B0-4945-01A	75	1	2	0	0	T1a	0	1	2145	7.0448	6.0799	10.029	11.083	3.2564	6.3743	6.4872	5.4222	Right	white	2
TCGA-A3-3322-01A	51	1	2	0	X	T1a	1	0	1478	8.8114	7.7697	10.5669	10.6344	6.2041	6.8702	6.4823	5.2508	Left	white	2
TCGA-B4-5834-01A	59	1	1	0	0	T1	1	0	38	7.1023	6.5306	9.6211	10.8209	4.0444	6.151	6.4764	4.3597	Right	white	1.2
TCGA-CZ-5458-01A	43	3	3	0	X	T3a	1	0	2789	9.0036	7.5803	10.7411	11.4876	4.7844	5.8962	6.4755	4.4672	Right	white	2.1
TCGA-BP-5184-01A	54	1	3	0	X	T1a	1	0	1133	7.6829	6.4885	10.3339	10.5335	3.7609	6.4446	6.474	4.2432	Left	white	0.9
TCGA-AS-3778-01A	35	1	1	0	X	T1a	1	0	43	8.0258	7.0294	10.6449	10.8259	5.9567	6.2985	6.4458	4.4015	Right	white	0.5
TCGA-B0-5713-01A	75	3	3	0	0	T3b	0	0	2782	5.7259	4.796	9.122	11.4707	5.0729	6.5305	6.4411	5.5359	Left	white	2.5
TCGA-BP-5007-01A	45	2	2	0	0	T2	1	0	1140	7.4546	6.6234	10.3377	11.4961	4.9997	6.7613	6.4327	6.1544	Left	white	1.7
TCGA-BP-4763-01A	79	1	2	0	X	T1a	0	1	1270	6.3085	4.9956	10.1394	10.7935	5.3338	6.7299	6.4209	5.3338	Right	white	1
TCGA-A3-3376-01A	51	1	2	0	0	T1a	1	1	1696	8.7034	7.8712	11.1471	11.7216	6.4331	6.6195	6.4034	4.9092	Left	black or african american	1.4
TCGA-BP-4341-01A	67	3	2	0	X	T3a	1	1	1589	4.1869	4.8644	8.8145	11.011	5.1972	6.7669	6.4016	5.3386	Left	white	1.6
TCGA-B4-5843-01A	45	1	2	0	0	T1	1	0	11	7.6451	6.1065	10.5934	10.5557	3.5983	6.1983	6.4015	4.256	Right	white	1
TCGA-CJ-4905-01A	62	1	2	0	X	T1a	0	0	1496	6.9193	5.8588	9.7662	10.5541	5.6169	5.9866	6.3666	4.3299	Right	white	3.1
TCGA-BP-4994-01A	54	1	3	0	X	T1a	1	0	1308	5.9743	5.4512	10.3166	10.3723	6.2855	5.8864	6.3618	4.6834	Left	white	1.5
TCGA-AK-3444-01A	80	1	2	0	X	T1b	0	0	1471	6.2955	5.1916	8.9533	10.8946	5.837	6.1624	6.3564	4.048	Left	white	0.8
TCGA-BP-4768-01A	72	1	2	0	0	T1a	0	0	400	6.909	6.3873	9.5674	10.8492	3.9684	6.2209	6.3531	4.8419	Left	white	1
TCGA-B0-5119-01A	61	1	2	0	0	T1b	0	0	1552	6.7767	5.8864	9.4885	12.0465	5.5428	6.2119	6.3415	4.6454	Right	white	1.2
TCGA-B4-5832-01A	65	3	2	0	0	T3b	1	0	155	7.8143	5.0494	11.0287	12.4964	5.6092	8.1441	6.3386	6.4369	Left	white	1.3
TCGA-BP-4164-01A	51	3	2	0	X	T3a	0	1	992	6.5583	5.384	9.9904	11.0148	4.4736	6.111	6.3168	5.756	Left	white	1.3
TCGA-CZ-5465-01A	76	3	2	0	X	T3b	0	1	2564	7.7938	6.6853	10.3951	11.056	4.4011	6.6889	6.3163	5.8148	Left	not reported	1.8
TCGA-BP-4347-01A	74	3	2	0	X	T3b	1	0	1367	6.6234	6.1024	9.9527	10.7481	4.5205	6.2042	6.309	4.8197	Right	white	1.5
TCGA-A3-3313-01A	59	1	3	0	0	T1b	1	1	735	6.9926	6.6271	9.3982	10.6348	5.2325	6.0962	6.3072	4.8639	Right	black or african american	2
TCGA-CJ-4876-01A	57	2	3	0	0	T2b	1	0	1955	5.1746	3.9727	9.3238	9.4879	1.1538	6.2504	6.3036	4.0097	Left	white	3
TCGA-A3-3380-01A	54	1	2	0	0	T1	1	0	567	7.6371	6.0973	10.391	10.1707	6.8501	6.1348	6.2892	4.3307	Left	not reported	1
TCGA-BP-4337-01A	76	3	4	0	0	T3b	0	1	2	7.0543	5.814	10.0985	10.0587	2.942	6.9798	6.2789	6.036	Left	white	1.9
TCGA-BP-4795-01A	74	1	2	0	0	T1a	0	0	620	7.9988	6.2712	10.2734	10.6916	5.9632	6.0156	6.2774	4.4457	Right	white	0.9
TCGA-B0-4696-01A	58	3	3	0	0	T3a	1	1	866	4.9888	3.8913	9.2693	9.3655	5.2637	6.1952	6.2749	4.7068	Left	white	2.5
TCGA-CZ-5982-01A	59	1	2	0	X	T1a	0	0	2439	6.9856	5.6864	9.8061	10.4282	6.3588	6.1583	6.2649	5.0865	Left	white	1.2
TCGA-B8-5159-01A	61	1	3	0	0	T1a	0	0	722	7.7531	6.2384	10.5099	11.6839	6.1742	6.0244	6.2643	4.2117	Right	white	1
TCGA-BP-4756-01A	62	1	2	0	0	T1b	0	0	374	7.5477	6.6475	9.4731	10.3947	3.078	6.3482	6.264	4.9766	Right	asian	1.5
TCGA-BP-4158-01A	69	1	2	0	0	T1b	1	0	3377	6.8568	5.952	9.6237	10.4239	4.5523	6.6427	6.251	4.7505	Right	white	1.6
TCGA-BP-4976-01A	77	1	3	0	X	T1a	1	0	1632	6.4799	6.447	9.5777	11.4326	6.0194	5.783	6.1979	4.2558	Right	white	1.1
TCGA-CW-6093-01A	73	1	1	0	X	T1a	1	0	3146	4.8406	4.5747	9.3625	10.6926	6.4564	6.1967	6.1775	4.7743	Right	white	1.3
TCGA-CZ-5986-01A	61	1	3	0	0	T1	1	0	373	7.6986	6.4952	10.3397	10.8173	5.5852	6.2337	6.1601	4.5832	Left	white	1.5
TCGA-BP-5168-01A	75	1	2	0	X	T1a	1	1	1463	6.1325	4.46	9.3599	10.0139	2.6444	6.0299	6.1592	4.5436	Right	white	1.9
TCGA-A3-3320-01A	52	1	1	0	X	T1b	0	0	1508	7.7607	7.2456	10.7611	11.0061	7.5804	6.5985	6.1581	5.4881	Right	white	1.5
TCGA-CJ-4638-01A	46	4	4	1	1	T3a	0	1	431	5.7161	5.3228	8.2486	8.9836	2.717	6.1291	6.1434	4.7053	Left	white	2
TCGA-B0-5115-01A	43	4	3	1	0	T2	1	0	1604	7.1636	6.5421	10.0468	10.8327	5.235	6.1665	6.108	4.8987	Left	white	1.2
TCGA-BP-5177-01A	46	1	3	0	X	T1a	0	0	293	6.7685	4.8533	9.4568	9.8442	2.8682	6.0696	6.0599	4.2136	Right	white	1.3
TCGA-A3-3365-01A	46	1	2	0	X	T1a	1	0	873	6.7211	5.968	10.3584	10.5856	4.4751	6.3145	6.0443	4.9812	Right	white	1.7
TCGA-B0-5695-01A	61	1	2	0	0	T1b	0	0	2150	6.1661	5.4505	9.2495	10.4351	6.1034	5.7577	6.0378	3.7885	Left	white	2.5
TCGA-B0-5693-01A	47	1	2	0	X	T1b	0	0	4074	7.2739	5.9223	9.9219	9.9767	6.6899	6.2723	6.0201	4.7313	Right	white	2.3
TCGA-BP-4784-01A	67	1	2	0	X	T1a	0	0	1854	6.5691	4.8906	9.2147	9.448	1.7606	5.5961	6.0149	3.649	Right	white	1.1
TCGA-BP-4774-01A	57	1	2	0	X	T1a	0	0	1885	6.4619	6.0364	10.0586	10.451	1.2943	6.687	6.0123	5.1643	Right	white	2
TCGA-BP-4974-01A	58	4	4	1	0	T3a	1	1	211	6.4388	6.4979	10.0092	9.9972	3.2157	6.1005	6.0044	4.2967	Right	white	2
TCGA-AK-3458-01A	48	1	3	0	X	T1b	1	0	1168	8.8965	6.6522	9.7488	9.8904	5.6405	6.1	5.9947	4.3443	Right	white	1
TCGA-BP-4351-01A	51	3	2	0	0	T3a	0	0	970	7.1098	7.8548	10.2036	10.6047	2.8708	6.6793	5.9619	5.865	Left	white	1.5
TCGA-EU-5904-01A	47	1	1	0	X	T1	0	0	551	8.2611	6.4349	10.4695	10.2643	6.1511	5.5433	5.9559	4.5409	Right	white	1.5
TCGA-CW-5583-01A	51	1	2	0	X	T1a	0	0	2489	5.7242	5.1445	9.5266	9.886	7.3919	5.5836	5.9333	3.9755	Right	white	1.8
TCGA-B8-4151-01A	51	3	2	0	0	T3a	0	0	1299	7.1166	5.5088	10.0537	11.1839	5.7885	5.5664	5.9269	4.2895	Right	white	1.1
TCGA-BP-4355-01A	59	3	4	0	X	T3a	0	1	953	6.4528	5.52	10.1842	9.8384	2.5819	6.843	5.9157	5.9054	Left	white	2.2
TCGA-B0-5116-01A	52	3	3	0	0	T3b	1	0	1274	5.7753	4.1785	8.7175	10.0157	2.7447	5.9846	5.8984	5.2961	Right	white	1.3
TCGA-CZ-5453-01A	67	2	2	0	X	T2	1	1	2419	6.6386	5.4959	8.3261	8.9687	4.6445	5.9159	5.8925	4.6814	Left	white	1.4
TCGA-CW-5581-01A	44	1	3	0	X	T1b	1	0	2799	7.4356	5.881	9.8056	10.5493	3.9526	5.3123	5.8892	3.7508	Right	white	1
TCGA-B0-4828-01A	79	4	3	1	X	T2	1	1	307	6.619	6.2424	9.1802	10.2369	3.8399	6.2965	5.8805	5.2282	Left	white	1.2
TCGA-AK-3436-01A	40	4	2	1	0	T2	1	0	3331	6.9044	4.8145	8.4668	10.0497	3.4234	7.1163	5.8793	5.8019	Left	white	1
TCGA-CW-5591-01A	56	4	2	1	0	T3a	1	0	2271	6.9481	5.5609	9.6799	9.8597	4.353	5.6688	5.8448	3.7116	Right	white	1.2
TCGA-BP-5186-01A	50	1	2	0	0	T1a	0	0	693	6.7326	5.0928	9.268	10.5302	4.3838	5.9608	5.8407	5.0502	Right	white	1
TCGA-B0-4706-01A	61	3	4	0	X	T3a	1	1	65	5.8102	5.4693	8.7151	10.8462	4.5264	5.9546	5.8001	4.2855	Left	white	3
TCGA-AK-3454-01A	84	1	3	0	X	T1b	1	0	874	6.4143	5.8642	9.9956	10.9014	7.4205	6.1243	5.7752	4.2355	Right	white	1
TCGA-AK-3461-01A	72	1	2	0	X	T1a	1	0	2217	6.8916	6.398	10.0618	10.5391	6.3214	5.8861	5.7498	3.7129	Left	white	1
TCGA-BP-4760-01A	69	1	2	0	X	T1a	1	0	2361	6.8411	5.5059	9.3734	9.5051	4.7861	5.36	5.7498	3.6197	Left	black or african american	1.3
TCGA-BP-4999-01A	56	1	2	0	X	T1a	1	0	1266	7.0563	6.4723	10.298	10.4484	6.4723	6.1156	5.7387	5.1853	Left	white	1
TCGA-B4-5844-01A	61	2	1	0	0	T2	0	0	7	5.4465	5.1109	9.7531	10.762	6.0329	5.6977	5.7288	4.1673	Right	white	1.1
TCGA-CW-6088-01A	60	1	2	0	0	T1b	1	0	3222	6.7957	6.0016	9.9925	10.7456	6.8241	5.6428	5.6505	5.0361	Right	white	1.4
TCGA-AK-3453-01A	58	2	2	0	X	T2	0	0	2531	7.0963	5.7057	8.3243	8.5497	2.7415	5.3151	5.6395	4.2015	Right	white	1
TCGA-B2-3923-01A	59	2	2	0	X	T2	1	0	992	3.7906	4.246	9.0072	9.4648	6.969	5.5769	5.616	4.0362	Right	white	2
TCGA-B4-5378-01A	62	1	2	0	0	T1	1	0	175	6.2686	5.5705	9.663	10.4592	7.1383	5.7629	5.6075	3.6322	Right	white	1.3
TCGA-BP-4340-01A	70	1	2	0	0	T1b	0	1	562	5.6963	5.4759	9.3476	10.5037	5.1573	5.5501	5.5587	3.8306	Right	white	2.1
TCGA-CZ-4859-01A	59	1	2	0	0	T1	0	0	1787	6.3168	5.6431	9.1619	10.0992	5.5749	5.0127	5.4529	3.5569	Right	white	1.5
TCGA-BP-4177-01A	65	1	2	0	X	T1a	1	0	1670	6.8691	5.0504	9.4195	9.1803	3.2024	5.3086	5.4507	3.7708	Right	white	1.2
TCGA-BP-5187-01A	54	1	2	0	X	T1a	1	0	406	6.9361	5.718	10.3074	10.4074	1.2954	5.3576	5.4324	3.8167	Right	white	1.8
TCGA-A3-3385-01A	46	1	2	0	0	T1a	0	0	1993	6.6934	6.05	9.4155	10.9559	5.8419	5.4434	5.4322	4.8086	Left	white	1.4
TCGA-B0-5099-01A	88	3	3	0	X	T3b	0	1	485	5.2184	4.6072	9.3683	8.8838	2.0414	5.1086	5.4156	3.6653	Right	white	2.5
TCGA-CJ-5681-01A	44	4	3	1	X	T3a	0	1	552	7.5301	5.9736	10.001	9.5439	4.07	4.9022	5.1936	4.0409	Left	white	2.8
TCGA-AK-3440-01A	58	1	3	0	X	T1a	1	0	2865	5.0053	4.3465	8.6697	8.2186	2.6931	4.8667	5.1813	3.0266	Left	white	1.2
TCGA-BP-4789-01A	48	1	2	0	X	T1a	1	0	1489	6.1225	4.3302	9.0143	9.4485	4.1405	5.0689	5.1428	3.7807	Right	white	0.9
TCGA-B0-4845-01A	70	4	2	1	X	T3a	1	1	1986	6.0692	5.8782	9.6385	10.3129	5.7099	5.9338	5.1377	4.2509	Right	white	1.5
TCGA-DV-5567-01A	40	1	2	0	X	T1a	0	0	2004	5.3808	4.2669	8.8827	9.7823	1.8325	4.9439	4.9882	4.0045	Right	black or african american	0.6
TCGA-BP-5192-01A	59	1	2	0	X	T1a	1	0	714	5.9385	5.447	9.1668	9.9074	3.3934	4.5008	4.8345	2.8539	Right	white	1
TCGA-B8-4619-01A	58	1	2	0	0	T1a	1	0	523	4.8068	4.4011	8.816	8.2815	3.207	4.8759	4.7343	3.207	Left	white	1
TCGA-B0-5117-01A	40	1	2	0	X	T1b	1	0	1608	4.5267	4.0811	8.2254	7.5719	3.1639	5.9313	4.7023	4.4879	Right	white	1
TCGA-BP-4969-01A	63	1	2	0	X	T1a	0	0	1794	5.2523	5.1027	9.3188	9.2163	1.6253	4.9358	4.6783	3.7999	Right	white	1.5
TCGA-BP-4765-01A	43	1	2	0	X	T1a	1	0	2184	6.4514	5.7547	10.3868	10.6551	3.1668	5.2123	4.6766	3.6794	Right	white	1.6
TCGA-AK-3447-01A	83	2	2	0	X	T2	1	0	1217	5.2332	4.5924	9.1897	8.264	5.1178	5.0772	4.6489	3.651	Left	white	0.8
TCGA-B0-5098-01A	53	1	3	0	X	T1	0	1	1584	5.7484	4.2765	7.0779	8.1263	4.1714	4.8364	4.5313	2.9648	Right	black or african american	2
TCGA-CW-5585-01A	51	4	2	1	0	T3b	1	0	2609	4.8123	4.2949	8.9503	9.8499	3.9706	5.0521	4.4458	3.6194	Right	white	1.8
TCGA-B8-5546-01A	38	1	2	0	0	T1b	0	0	505	3.3206	3.2466	7.6955	8.7231	3.0862	4.1279	4.4249	3.2466	Right	black or african american	1.3
TCGA-B0-5703-01A	73	1	3	0	0	T1b	1	0	2246	4.7274	3.1949	8.8353	9.772	6.4371	4.8084	4.1139	3.3472	Left	white	1.8
TCGA-DV-5576-01A	55	1	2	0	X	T1a	0	1	727	3.9496	2.9392	8.2272	8.9457	3.4106	4.2316	4.113	2.6294	Left	black or african american	1.3
TCGA-B0-4707-01A	63	3	4	0	X	T3a	1	1	600	4.3527	3.748	7.1465	9.0612	3.748	4.2385	4.0483	2.5017	Left	white	2.2
TCGA-BP-4769-01A	63	1	2	0	X	T1a	1	0	1876	5.9048	4.693	8.3879	8.532	1.5424	3.8848	3.6412	3.4524	Left	white	1.4
TCGA-A3-3328-01A	79	1	2	0	0	T1b	1	0	1385	3.3658	3.0785	6.9455	7.814	5.6084	4.6376	3.4501	2.5764	Left	white	1.5
TCGA-B0-4834-01A	49	1	3	0	0	T1a	1	1	2090	2.132	3.1265	7.9929	8.2527	2.132	3.278	1.7726	2.132	Right	white	2.5

## Sheet: Sheet2
submitter_id.samples	FCGR2B	FCGR2C	FCGR2A	FCGRT	FCGR3A	FCGR3B	FCGR1B	FCGR1A	FCGR1C
TCGA-CW-6087-01A	7.3576	6.5813	12.3159	11.2382	15.0255	7.5858	10.6818	11.2417	8.9648
TCGA-AK-3426-01A	9.9752	8.4417	11.6779	12.4608	12.8269	7.2458	10.7531	11.0278	9.2214
TCGA-BP-4167-01A	10.0034	8.0036	11.9415	12.7823	13.1377	6.1145	10.1446	10.4925	8.4315
TCGA-CJ-4890-01A	10.2098	8.738	12.7101	12.6022	13.4104	4.0239	9.6917	10.2139	8.0773
TCGA-B0-4690-01A	9.8799	9.1076	12.1283	11.7024	14.0379	9.488	9.8371	10.15	8.0618
TCGA-B8-5551-01A	10.8308	9.2923	12.5583	12.8135	14.2182	5.1782	9.9751	10.0885	8.9454
TCGA-CZ-4861-01A	11.6422	10.4631	12.236	12.1849	14.15	9.5534	9.529	10.0538	7.9472
TCGA-BP-4173-01A	9.5249	9.1383	11.9432	12.0314	14.1902	8.2076	9.6291	10.0062	7.9263
TCGA-B8-5162-01A	9.9098	8.2029	12.6016	13.0626	14.3107	7.3467	9.3792	9.9578	7.9549
TCGA-CJ-4637-01A	9.4096	8.0163	11.3196	11.8834	13.6018	3.6627	9.482	9.8821	7.6167
TCGA-B0-4712-01A	9.1196	7.7717	11.028	11.6186	12.4689	4.867	9.6275	9.8309	8.6164
TCGA-B0-4694-01A	9.6992	8.1407	11.3817	13.0341	13.8397	7.2139	9.2755	9.8141	7.7567
TCGA-BP-4354-01A	10.2801	9.3202	13.2674	12.3691	14.1435	10.6393	9.5644	9.7821	8.5182
TCGA-B0-5702-01A	6.6229	2.7525	9.0313	12.2562	12.017	5.2043	8.9666	9.7148	7.5618
TCGA-CJ-4873-01A	10.0887	8.0669	11.8135	12.562	12.5742	4.8235	9.602	9.6896	7.8591
TCGA-B0-5081-01A	9.7256	8.4957	11.4391	12.0155	13.2995	6.0762	9.4107	9.6822	8.1968
TCGA-CJ-4888-01A	9.1346	7.7343	11.5386	12.0556	13.3201	6.426	9.5622	9.6383	8.3787
TCGA-BP-5191-01A	9.413	7.4255	11.2616	12.5734	12.4299	4.9734	9.8957	9.5916	8.2738
TCGA-CW-6090-01A	9.7566	8.2957	11.9505	12.4869	13.122	6.8527	8.9777	9.5334	7.3538
TCGA-CJ-6027-01A	7.4621	6.1267	11.0207	12	12.9764	5.4135	9.0892	9.5013	7.6054
TCGA-CJ-5676-01A	7.2014	5.208	11.0549	12.9136	12.6775	5.0901	8.9366	9.4677	7.4561
TCGA-CJ-6030-01A	9.891	7.8618	12.1786	12.4924	14.2259	3.8684	9.1321	9.4553	7.2779
TCGA-CZ-5454-01A	10.9724	9.556	11.7658	12.7831	13.5405	7.4847	8.9996	9.451	8.0709
TCGA-B0-4700-01A	7.9098	6.4306	11.1111	12.2883	12.363	5.1097	9.4773	9.427	7.6629
TCGA-CJ-5671-01A	8.7782	7.2944	11.6208	12.6814	13.0048	3.715	8.9088	9.4266	7.1913
TCGA-CJ-4901-01A	8.4254	7.4005	10.9193	12.1618	12.7602	5.6305	9.287	9.4096	7.8152
TCGA-AK-3425-01A	8.8956	7.0317	10.9264	12.9658	12.8099	2.5881	8.9316	9.3896	7.3961
TCGA-BP-4989-01A	8.5474	7.8473	10.8571	11.7813	12.8322	5.4878	9.5782	9.3826	7.8897
TCGA-B0-4842-01A	8.0848	5.3569	9.9439	12.1025	12.1517	9.45	9.3514	9.3665	7.4119
TCGA-BP-4960-01A	8.5986	7.8944	11.3127	12.6866	12.6891	5.9665	9.0697	9.3275	7.4467
TCGA-CJ-4895-01A	9.0797	7.2341	11.6665	11.9139	13.6627	3.4181	9.0048	9.3221	7.3317
TCGA-BP-4983-01A	10.6218	9.0702	11.8414	11.349	13.3814	6.2993	8.8038	9.3187	7.2133
TCGA-B0-4697-01A	8.9399	7.9696	11.0561	11.8309	12.0539	4.7059	9.1624	9.3108	7.5591
TCGA-B0-4815-01A	8.4418	7.6257	10.6832	12.0874	13.2631	7.0092	9.6456	9.2987	8.4032
TCGA-B0-4819-01A	8.8532	8.3989	10.9287	12.172	11.8776	5.8414	9.1885	9.2709	7.589
TCGA-CJ-5677-01A	9.2601	7.1677	11.6421	12.7306	12.6997	3.8571	8.7269	9.264	7.0441
TCGA-BP-4787-01A	9.9794	8.4466	11.7257	12.3712	13.1852	8.3268	8.9289	9.2364	7.4829
TCGA-BP-4777-01A	9.1425	7.5333	11.1073	12.34	12.6455	6.2812	8.7941	9.2122	7.1808
TCGA-B0-4847-01A	7.4496	7.3626	11.0545	12.1492	12.2972	5.9768	9.4139	9.1717	7.7825
TCGA-B8-5164-01A	9.2521	8.3263	11.073	11.9828	13.0363	6.4141	8.9352	9.1707	7.2169
TCGA-B8-4143-01A	6.7641	6.3381	10.7755	11.8871	12.7145	5.513	8.9318	9.1616	7.139
TCGA-BP-4343-01A	9.7604	7.805	11.5776	12.2401	13.1823	5.2234	8.771	9.1552	6.9645
TCGA-B8-5163-01A	8.4717	7.8483	11.7601	12.269	13.7479	6.8494	8.7482	9.1458	7.4565
TCGA-BP-4962-01A	9.6312	8.1213	11.2285	12.5716	12.338	5.8613	8.6592	9.1455	7.1513
TCGA-CJ-4887-01A	7.9216	7.2173	11.4535	12.6596	12.9978	5.3866	9.044	9.0835	7.3409
TCGA-BP-5182-01A	9.5623	8.0156	11.9	12.6123	11.9034	4.6649	8.5734	9.0775	6.9368
TCGA-B0-4699-01A	8.3904	7.6938	11.3781	11.4594	12.6231	5.0327	8.677	9.0703	7.0143
TCGA-A3-3378-01A	9.4644	9.3974	12.2102	12.1266	13.9417	10.5143	9.0419	9.05	7.7533
TCGA-CJ-4636-01A	9.0786	8.2805	11.5512	12.215	12.9679	5.8358	8.8336	9.046	7.3994
TCGA-CJ-4881-01A	8.9221	7.734	11.3002	12.0606	12.9201	8.6777	8.9288	9.0241	7.782
TCGA-CJ-6031-01A	9.3048	7.6478	11.4485	12.8371	12.694	6.0905	8.9484	9.0173	7.1771
TCGA-BP-5009-01A	8.6547	7.4308	11.0824	11.9931	12.7969	3.5712	8.7881	9.0112	7.247
TCGA-BP-5199-01A	7.0942	5.8395	10.0566	12.2645	11.6784	1.8794	8.6649	8.9992	7.1998
TCGA-B0-5400-01A	7.7337	5.6473	10.6031	12.4932	11.2495	9.0264	8.6291	8.9987	7.9917
TCGA-BP-4176-01A	10.5223	8.779	12.1116	12.6313	12.3954	8.5803	8.3786	8.9936	6.7838
TCGA-CJ-4900-01A	10.4671	8.9785	12.328	12.2043	13.0221	5.2808	8.6044	8.992	7.067
TCGA-CJ-4641-01A	9.2236	8.1281	11.0436	12.1784	12.1198	5.2275	8.9964	8.978	7.0207
TCGA-BP-4972-01A	9.6056	8.0898	11.7626	12.4693	11.8998	7.1538	8.5351	8.9775	6.9752
TCGA-A3-3346-01A	10.798	9.4062	11.5582	12.7809	12.8315	8.7954	8.5716	8.9714	7.1573
TCGA-CJ-5672-01A	8.1458	6.7403	11.0407	12.5485	12.9519	5.8911	8.5852	8.9514	6.9982
TCGA-B2-4098-01A	10.0082	8.7454	11.2515	11.3468	12.1119	7.9567	8.5765	8.9497	6.8117
TCGA-B2-3924-01A	6.6134	5.6887	10.8725	12.5351	13.3544	6.6077	8.8578	8.9383	7.2402
TCGA-B0-4810-01A	8.2	6.4733	10.9864	12.3774	12.0029	5.3263	8.8395	8.9366	7.2149
TCGA-B2-5641-01A	8.9282	7.9705	11.0378	12.4602	13.3212	7.3416	8.2976	8.9217	6.8057
TCGA-BP-4804-01A	8.5898	6.9512	10.9532	12.487	12.6066	3.5013	8.9272	8.9187	7.2681
TCGA-BP-5169-01A	9.3004	7.5506	10.9835	11.8235	12.0725	4.7364	9.3987	8.9004	8.297
TCGA-BP-4160-01A	8.4308	6.7053	10.7861	12.2484	13.0518	4.8964	8.4976	8.8945	6.4912
TCGA-CZ-5456-01A	9.9747	8.8179	10.6291	12.2095	11.6519	6.2513	8.2332	8.8922	6.7655
TCGA-CJ-5678-01A	9.6643	7.1526	11.1411	12.9193	12.1566	4.6226	9.0567	8.891	7.5259
TCGA-CJ-5675-01A	7.7535	6.2003	10.7399	12.2111	13.6955	4.55	8.4741	8.8899	6.8571
TCGA-CZ-5452-01A	8.6034	7.9866	10.6428	12.3092	12.909	8.4464	8.5248	8.8853	6.8681
TCGA-B0-5108-01A	10.026	8.7864	12.2171	12.1716	13.2033	6.6119	8.9364	8.8777	7.6239
TCGA-DV-5574-01A	8.2957	6.4729	11.9521	12.3825	12.8616	5.5771	8.4957	8.8774	6.8291
TCGA-CJ-4916-01A	8.9888	7.518	11.2019	12.2693	12.9903	5.399	8.5113	8.8593	6.953
TCGA-B0-4822-01A	7.6371	4.4537	10.546	12.6602	11.6941	4.9319	8.8059	8.8585	7.2911
TCGA-B0-5692-01A	7.7095	5.8533	10.4859	11.9952	12.285	4.5633	8.4568	8.8584	6.7333
TCGA-CJ-4868-01A	8.6475	7.1417	11.5098	12.4575	12.5371	5.6129	8.6099	8.8496	6.8315
TCGA-BP-5175-01A	7.4669	6.4289	10.4145	11.6359	11.8358	7.3453	8.5443	8.8447	6.2402
TCGA-B0-5697-01A	8.813	7.3733	10.8483	11.6818	12.8859	7.0473	8.6062	8.8443	7.0049
TCGA-CZ-5470-01A	8.9306	7.1555	10.732	11.9686	12.4727	6.0545	8.5744	8.8431	6.9451
TCGA-BP-4163-01A	9.2287	8.2196	10.8381	11.8986	12.3236	3.9305	8.4912	8.834	7.4349
TCGA-BP-5170-01A	8.3511	5.8431	11.1004	12.7554	11.7547	3.7977	8.3783	8.8331	6.8605
TCGA-CZ-4857-01A	8.6475	7.9695	10.9561	12.6779	12.6732	7.3764	8.8112	8.8157	7.1767
TCGA-BP-4771-01A	7.8423	8.0598	10.8673	11.9897	13.0594	6.3944	9.5118	8.8145	7.7273
TCGA-B0-5083-01A	9.9123	7.8673	11.5308	11.7989	11.0559	2.5778	8.367	8.8102	6.4993
TCGA-CZ-5455-01A	8.193	7.3824	10.9949	11.8831	13.0169	7.4532	8.2078	8.8013	6.9377
TCGA-B0-4824-01A	8.0423	7.0776	10.4675	12.4926	12.5761	6.5507	8.6022	8.7765	7.0668
TCGA-B0-4688-01A	9.0047	7.4579	11.7635	11.6462	12.4629	2.7816	8.5086	8.7712	6.9757
TCGA-CJ-4891-01A	9.1936	7.2293	11.5811	11.4619	11.831	8.6087	8.7497	8.7697	6.9374
TCGA-B0-5709-01A	9.139	7.8338	11.0394	11.9589	12.8292	6.0306	8.1893	8.7538	6.4144
TCGA-CZ-5464-01A	8.0813	7.0373	10.731	12.6678	12.5939	6.0551	8.2608	8.7445	6.7259
TCGA-CZ-4864-01A	9.5752	8.6531	10.9462	11.867	13.3437	7.0832	8.2689	8.7367	6.7317
TCGA-B0-4827-01A	8.5058	6.5137	11.2793	12.2061	12.5475	6.1467	8.6327	8.7315	6.885
TCGA-BP-4807-01A	9.3692	8.4549	11.3592	12.8082	11.9513	7.6525	8.5657	8.7306	6.8554
TCGA-CJ-4869-01A	8.417	6.4857	11.0731	12.4651	12.6555	5.3048	8.439	8.7283	6.3621
TCGA-CJ-4923-01A	7.7303	6.8943	10.3196	11.6756	11.818	4.785	8.3973	8.7228	6.8647
TCGA-BP-4346-01A	7.6622	7.9319	10.7625	11.8578	12.8611	3.9806	8.93	8.7197	7.2513
TCGA-A3-3319-01A	8.4412	7.7085	10.8305	11.2038	12.8196	5.5403	8.6055	8.7175	7.5534
TCGA-B0-4714-01A	7.4107	7.7577	10.5784	12.0797	12.418	5.6244	9.0722	8.7055	7.5238
TCGA-B0-4848-01A	9.7592	7.4408	11.203	12.2012	12.5585	4.2103	8.2338	8.689	6.7732
TCGA-CZ-4858-01A	6.5304	6.2124	11.0042	11.4966	12.6398	6.0626	8.6332	8.678	7.571
TCGA-B0-5106-01A	7.5839	7.5288	11.2385	12.4276	12.8639	6.8112	8.7753	8.6742	7.8372
TCGA-AK-3445-01A	7.8195	7.5228	11.112	12.6595	12.7394	5.1078	8.2377	8.6699	6.8635
TCGA-A3-3347-01A	9.2919	9.1396	12.0342	12.1843	13.3564	6.2216	8.6543	8.6696	7.2938
TCGA-CJ-5686-01A	8.9091	7.6996	10.9869	11.7307	12.6822	6.0659	8.5106	8.6439	6.9516
TCGA-B0-5107-01A	8.7008	6.7528	9.9277	12.0805	12.0651	3.8213	8.4921	8.6324	6.9547
TCGA-BP-4161-01A	8.2604	7.5777	10.5368	12.0851	12.3119	6.4367	8.3966	8.6184	6.8745
TCGA-BP-5198-01A	9.8967	8.2215	11.3688	12.0738	12.2782	6.2521	7.9743	8.6096	6.2872
TCGA-B2-4099-01A	7.0703	5.6363	10.4773	12.8273	12.8916	6.081	8.7171	8.6091	7.6608
TCGA-BP-4353-01A	7.0523	5.8747	11.5032	12.1939	12.6826	3.5263	8.5117	8.6056	7.0223
TCGA-BP-4345-01A	9.6443	7.8262	11.1243	12.1195	12.0369	1.163	8.1176	8.6046	6.9064
TCGA-DV-5573-01A	7.4902	8.0558	10.4894	11.954	12.8588	6.6572	8.2984	8.5949	6.8451
TCGA-B0-4718-01A	7.7207	7.0162	10.6744	12.0871	11.5943	0.7575	8.2055	8.5885	6.8535
TCGA-CZ-4863-01A	6.0216	6.2628	10.2225	11.5417	13.5471	5.6383	8.3365	8.5856	6.8338
TCGA-B0-5092-01A	7.5867	7.3072	10.3534	11.8491	12.1706	5.4862	8.8366	8.5811	7.6737
TCGA-CZ-5468-01A	7.4494	6.0013	10.8459	11.8613	12.0099	4.1305	8.3017	8.5716	6.8655
TCGA-BP-4174-01A	7.1931	6.7035	10.5369	11.7062	12.4674	7.2213	8.0125	8.5605	6.1197
TCGA-B0-5109-01A	8.1858	7.0894	10.3221	10.6173	11.6476	9.2784	8.441	8.5535	6.6887
TCGA-BP-5189-01A	8.2386	7.8696	11.701	11.9504	13.0448	6.2896	8.1602	8.5488	6.6148
TCGA-CJ-6028-01A	6.9149	5.3372	10.9715	11.7458	12.6887	5.6486	8.1015	8.5447	7.0217
TCGA-A3-3358-01A	10.0651	8.3448	11.4319	12.3429	12.0986	5.6885	8.491	8.5398	7.0994
TCGA-B0-4839-01A	8.8899	6.6761	11.6983	12.7848	12.8572	5.9508	8.4924	8.5338	7.3585
TCGA-CZ-5985-01A	8.7242	7.288	10.9884	12.2206	12.6786	5.49	8.3418	8.5302	6.7016
TCGA-B0-4698-01A	8.0604	6.8023	11.0197	10.62	12.7421	9.2709	8.1268	8.5178	6.7621
TCGA-CJ-4640-01A	9.1092	7.2247	11.0594	12.4558	13.4146	3.556	8.739	8.515	7.5922
TCGA-CW-5587-01A	7.1289	5.4617	10.4033	11.9957	12.7088	6.0504	8.0688	8.5027	6.0431
TCGA-B0-5075-01A	9.7261	8.4207	11.2373	12.3438	12.5905	5.6276	8.0708	8.4967	6.5542
TCGA-A3-3387-01A	10.1894	9.0139	12.0642	11.9652	12.8617	6.6666	8.2011	8.492	6.7387
TCGA-BP-4758-01A	5.7819	4.9508	10.4263	12.8324	11.7924	5.1215	8.3722	8.4829	6.4412
TCGA-CJ-4884-01A	8.6301	7.2816	10.641	12.0613	12.1724	4.8037	8.2035	8.4799	6.7221
TCGA-CZ-4860-01A	9.997	8.1478	11.1794	11.6432	12.5078	3.4167	8.2319	8.4726	6.5885
TCGA-CW-5588-01A	8.3914	6.8515	11.1418	12.3887	12.8656	7.2095	7.8882	8.4462	5.8314
TCGA-B0-4843-01A	7.408	5.7786	9.8422	12.309	10.917	6.6206	8.2705	8.4446	6.6948
TCGA-CJ-4918-01A	8.3733	6.7571	11.2604	12.2712	12.4034	5.1932	7.9276	8.4384	6.7349
TCGA-B0-4823-01A	8.0259	7.3794	11.1208	12.5029	12.4691	4.8021	7.9861	8.437	6.3322
TCGA-CJ-4644-01A	8.229	7.1947	10.4319	12.3227	11.561	5.408	7.8466	8.4303	6.2379
TCGA-B8-5158-01A	9.031	7.4287	11.1906	11.8224	12.7663	7.9288	8.2551	8.4271	6.6016
TCGA-BP-4986-01A	8.4106	7.3858	11.4126	11.5915	12.974	6.9895	8.2544	8.4195	6.7118
TCGA-B0-5097-01A	8.8242	7.4209	12.0478	11.9738	12.4416	6.7695	8.0994	8.413	6.3242
TCGA-CJ-4894-01A	6.9372	6.6448	10.3296	12.0639	13.3036	5.553	8.3612	8.4089	7.2529
TCGA-BP-4781-01A	7.1853	6.2496	10.7264	12.7066	12.3368	6.3919	8.0017	8.3999	6.131
TCGA-CZ-4862-01A	8.4471	7.6386	10.5115	11.8465	12.6947	5.4479	8.2569	8.364	6.6621
TCGA-B8-5550-01A	8.1866	6.8909	10.9794	12.0832	12.0303	5.2673	8.0422	8.3635	6.4737
TCGA-BP-4770-01A	9.3245	6.6785	11.9198	12.2687	12.5689	2.6598	8.1976	8.3559	6.7704
TCGA-B0-4703-01A	7.4625	6.9603	10.6076	10.8886	12.1765	3.7224	7.9366	8.3496	6.3273
TCGA-B8-4620-01A	8.246	6.6365	11.4446	12.1409	12.9481	10.2025	7.8936	8.3367	6.1998
TCGA-DV-5568-01A	8.2073	7.225	10.6745	12.7094	11.5493	5.1675	7.927	8.3194	6.2431
TCGA-BP-5201-01A	6.8082	6.5032	10.5099	12.4587	11.6707	1.5567	8.4421	8.3177	6.6443
TCGA-AK-3429-01A	8.3694	5.9327	10.2522	12.5708	12.2258	4.4291	8.2158	8.3122	6.538
TCGA-BP-4782-01A	7.169	6.1568	10.5423	12.3315	12.1641	2.4383	7.9335	8.3118	6.371
TCGA-B0-5706-01A	8.0309	6.9808	10.1198	12.1344	11.9072	5.4733	7.769	8.3044	5.9494
TCGA-BP-4797-01A	8.2811	6.7617	10.8053	12.0527	12.2972	7.1796	7.8041	8.2489	6.1071
TCGA-BP-4971-01A	7.9602	7.6052	10.5932	11.524	10.9471	3.723	8.3909	8.2412	6.675
TCGA-BP-4992-01A	7.6067	7.6415	10.4643	11.7198	11.4343	3.9343	8.6501	8.2371	7.6562
TCGA-CJ-4903-01A	8.6572	7.2356	11.108	12.2146	12.4211	4.0057	7.8552	8.2189	6.7991
TCGA-BP-5183-01A	7.0477	6.6569	9.8876	12.3473	11.9175	4.7382	7.9115	8.2184	6.372
TCGA-BP-4970-01A	9.1647	7.9577	11.3753	12.0043	13.9107	5.7872	7.6891	8.2111	6.3164
TCGA-BP-5196-01A	6.9616	6.3917	10.5961	12.206	12.0648	1.5915	8.0154	8.2085	6.5977
TCGA-A3-3329-01A	7.8072	6.8664	10.5119	12.3851	12.3387	6.1619	8.2878	8.1985	6.4911
TCGA-AK-3431-01A	7.4094	5.6716	10.5761	12.1447	11.4486	5.521	7.86	8.1974	6.1761
TCGA-CJ-4893-01A	7.7637	6.6276	10.1764	12.234	13.207	5.6198	7.7718	8.1756	6.1301
TCGA-BP-4169-01A	8.9715	7.9604	11.7885	12.3829	12.266	8.8453	7.9303	8.1755	6.3968
TCGA-B0-4844-01A	6.4242	5.5401	9.7751	13.0942	11.3575	5.6411	7.8228	8.1683	6.2434
TCGA-B0-4813-01A	6.818	6.3839	10.0646	11.9463	11.1078	6.0245	8.8495	8.1635	7.1582
TCGA-A3-3316-01A	7.8299	7.5759	11.3151	12.1317	12.2048	7.2417	8.0825	8.1495	6.7339
TCGA-CJ-4875-01A	6.9391	6.0347	9.46	12.4741	11.4043	4.5376	8.3055	8.1475	6.882
TCGA-CZ-5462-01A	7.3391	5.9978	10.3148	11.7247	12.1237	8.9779	8.1562	8.1438	6.3561
TCGA-BP-4162-01A	7.3785	6.7998	10.5154	11.888	12.3316	6.8285	7.6784	8.1428	6.0886
TCGA-B0-4838-01A	5.8378	6.2744	10.5085	11.7827	12.13	5.5068	8.1619	8.1372	6.7404
TCGA-B8-5545-01A	7.9585	6.7668	11.0505	12.287	12.5128	7.044	7.9125	8.1273	6.4932
TCGA-B2-5635-01A	9.3986	8.2836	11.2878	11.964	13.4566	6.8908	8.1042	8.1248	6.8812
TCGA-BP-4968-01A	7.192	5.3325	10.1989	12.6282	11.8633	3.972	7.9683	8.1142	6.5589
TCGA-BP-4959-01A	9.5972	7.9435	11.4405	12.4471	11.4836	4.1269	7.904	8.1016	6.5854
TCGA-DV-5565-01A	6.6937	4.6762	10.6735	12.4483	10.6656	4.3145	7.5945	8.0808	5.5492
TCGA-CZ-5466-01A	9.8036	8.0387	10.8473	12.6891	11.5659	2.9163	7.7724	8.0796	6.14
TCGA-A3-3351-01A	8.2622	8.5437	11.4342	12.1711	13.0511	6.0694	8.1733	8.0784	6.6746
TCGA-AK-3451-01A	9.2062	6.4973	9.6438	12.8873	9.4521	5.2484	7.7848	8.0682	5.9304
TCGA-BP-4170-01A	8.2021	6.6923	11.6381	12.5858	12.5138	7.3954	7.7091	8.0642	6.1549
TCGA-BP-5178-01A	9.915	8.2829	12.4326	12.5076	12.0491	4.4432	7.6504	8.0561	6.6576
TCGA-BP-4330-01A	7.4941	7.4865	10.5731	12.2153	12.381	7.8608	7.8899	8.0395	6.3787
TCGA-CZ-5457-01A	7.444	6.1112	10.7895	12.3542	12.1484	6.474	7.9585	8.0023	6.9846
TCGA-B0-5113-01A	8.2817	8.2097	10.6452	11.615	12.1305	6.2436	7.7314	7.9941	6.2627
TCGA-BP-4159-01A	7.6961	5.3149	10.2434	12.4438	12.2178	3.4589	7.7757	7.9911	6.2191
TCGA-CZ-4865-01A	8.2959	6.334	11.0641	12.3718	12.4011	5.6132	7.6291	7.9902	5.6348
TCGA-BP-4338-01A	7.7831	6.5778	10.9127	12.4745	11.9751	5.0895	7.5209	7.9888	5.9321
TCGA-B8-4148-01A	6.7015	7.6393	10.5919	11.9299	12.735	4.539	8.013	7.9816	6.5384
TCGA-CJ-4635-01A	7.8323	7.7137	10.5082	12.499	11.9436	4.8574	7.826	7.9766	6.2568
TCGA-BP-5000-01A	7.9145	6.3967	10.5677	12.5774	11.7487	4.3545	8.1138	7.9702	6.4941
TCGA-CW-6097-01A	8.3984	6.9734	11.0248	11.7826	12.3835	6.5376	7.5698	7.9699	5.7372
TCGA-BP-4335-01A	7.1384	6.6789	10.1714	12.3109	11.1837	2.6737	8.0933	7.966	6.1796
TCGA-B0-4691-01A	8.4115	6.9366	10.0821	12.4218	11.4041	3.9069	7.7814	7.9542	6.1189
TCGA-B0-5080-01A	7.7644	5.6692	10.4185	12.2651	11.0943	4.2794	7.8508	7.9527	6.5106
TCGA-CJ-4902-01A	7.9193	6.9252	11.1711	12.4963	12.0043	4.9211	7.5347	7.9391	6.1044
TCGA-CZ-5469-01A	8.2283	5.2915	9.9253	12.9845	10.9034	3.2595	7.5278	7.9163	6.281
TCGA-CZ-4866-01A	7.5464	6.7796	9.6547	11.9706	12.0916	3.7138	7.6649	7.9137	6.0973
TCGA-CJ-4874-01A	8.7362	7.3189	10.6689	12.4256	12.3319	5.1623	7.6489	7.8953	5.898
TCGA-CJ-4920-01A	8.3816	7.1766	10.5599	11.9866	12.2136	5.0926	8.0101	7.8923	6.994
TCGA-A3-3382-01A	8.8866	7.5192	11.2341	12.0861	12.5233	5.7891	7.7851	7.8761	6.0719
TCGA-BP-4801-01A	9.9422	8.268	11.3335	12.7512	10.8295	4.5833	7.993	7.8566	6.3018
TCGA-BP-4963-01A	8.8883	8.1363	11.5825	12.0311	12.2592	6.0737	7.7111	7.8543	6.4376
TCGA-CZ-5984-01A	9.2608	7.9151	10.8939	12.6024	12.247	5.3903	7.5688	7.838	5.6495
TCGA-BP-4331-01A	7.5424	7.2134	10.3062	12.4219	12.1321	7.1955	7.8942	7.8218	6.4296
TCGA-CW-5590-01A	6.6423	5.2352	10.5592	11.9195	11.5587	3.8035	7.482	7.8213	5.7833
TCGA-A3-3323-01A	8.5873	8.63	11.103	12.1717	12.6498	5.7933	7.7285	7.8082	6.2422
TCGA-CJ-4889-01A	9.155	7.7704	10.8738	12.2318	12.0226	3.293	7.3943	7.8057	5.6657
TCGA-BP-4762-01A	8.4458	6.7164	10.8687	12.6862	11.9083	6.0404	7.6135	7.7948	5.7997
TCGA-A3-3363-01A	9.5771	7.8546	10.5106	12.0305	11.1559	6.5902	7.5827	7.7923	6.5852
TCGA-A3-3370-01A	7.0614	7.2387	10.638	12.0139	12.4245	6.4004	7.4582	7.7869	5.7744
TCGA-B0-5698-01A	9.2698	8.0862	11.3909	12.0329	12.1561	7.2495	7.5852	7.7831	5.926
TCGA-BP-4981-01A	7.6637	7.2424	10.7985	12.481	11.4966	2.0398	7.9475	7.7805	6.3001
TCGA-CW-5580-01A	8.3696	7.0276	10.8034	11.6381	11.4367	6.0766	7.2462	7.7756	5.4675
TCGA-CJ-4872-01A	8.9068	7.383	11.128	12.2886	11.4696	5.8633	7.8056	7.7736	6.6125
TCGA-CJ-4886-01A	8.0058	5.9386	10.3279	12.2448	12.0065	4.467	7.549	7.7695	5.9474
TCGA-B4-5835-01A	8.0587	5.7156	10.1071	11.1187	10.9977	3.8422	7.406	7.7649	5.8277
TCGA-CJ-4643-01A	7.8918	7.1075	11.2093	12.057	11.6875	4.9911	7.5589	7.7544	6.2208
TCGA-B0-4833-01A	6.836	6.2206	9.944	12.4089	11.4864	4.8007	8.1191	7.7332	5.9639
TCGA-B0-5102-01A	7.8493	6.3368	10.1767	12.5897	11.4932	3.5385	7.507	7.7323	5.9747
TCGA-A3-3383-01A	9.4741	7.0522	10.7235	13.5365	11.8718	6.711	8.2129	7.7297	6.7761
TCGA-B0-4846-01A	6.7944	6.7482	10.6042	11.815	12.0921	6.7622	7.4675	7.7297	6.1465
TCGA-BP-5195-01A	8.1668	7.0984	11.1056	12.5134	12.7066	7.7043	7.4591	7.7248	5.6504
TCGA-BP-5200-01A	8.223	7.0414	10.9926	12.0506	11.9966	7.7827	7.5759	7.72	6.3575
TCGA-A3-3374-01A	9.5258	7.6061	11.0681	12.366	9.7367	5.7021	7.2823	7.7155	6.0539
TCGA-B0-4816-01A	9.8232	8.834	12.1242	12.8366	13.1788	7.1505	7.3719	7.7143	6.0943
TCGA-B0-4817-01A	7.9905	6.4131	10.9184	12.7484	11.2436	12.4566	7.9013	7.7134	6.1148
TCGA-BP-5010-01A	6.8966	6.7427	9.9392	12.4021	10.5942	4.6845	7.9338	7.7029	5.993
TCGA-A3-3357-01A	6.9595	6.3822	10.8393	12.1889	12.4825	6.9634	7.2462	7.7019	5.4277
TCGA-A3-3311-01A	6.715	6.5085	10.6755	12.0614	12.5382	6.6349	7.8628	7.6963	6.5807
TCGA-BP-5180-01A	8.908	7.1326	10.8418	12.9875	12.0649	4.5304	7.3561	7.691	5.6375
TCGA-CJ-5684-01A	6.8458	5.6249	10.3158	12.32	11.3493	2.8163	7.4516	7.687	5.749
TCGA-CZ-4854-01A	6.2411	6.1394	9.8521	12.2353	11.5514	4.7799	7.4775	7.685	6.3621
TCGA-BP-4329-01A	9.0951	7.5601	10.9233	12.5367	11.4323	5.4616	7.3869	7.6763	5.5773
TCGA-BP-4803-01A	8.239	6.62	10.268	12.3714	11.4823	2.3648	7.0804	7.6725	5.7503
TCGA-B0-4701-01A	8.841	7.8814	10.8073	11.782	10.7628	5.3369	7.9303	7.6699	6.3189
TCGA-CJ-4871-01A	7.4461	5.6577	10.1346	12.4046	12.1833	4.7179	7.2011	7.6664	5.5198
TCGA-A3-3317-01A	7.634	7.5513	10.5122	11.7151	11.6724	3.3001	7.4876	7.6657	6.1359
TCGA-BP-4998-01A	9.8423	8.5646	11.3131	12.1519	12.4131	6.7387	7.3841	7.6556	5.8527
TCGA-B8-4622-01A	8.9662	7.7719	10.9199	12.1522	12.2958	6.9473	7.7719	7.6403	6.6815
TCGA-AK-3456-01A	8.7418	6.9836	10.107	11.4442	10.8438	6.5984	7.1585	7.6382	5.642
TCGA-CZ-5463-01A	7.1302	6.4221	10.3425	11.6467	11.741	5.9148	6.8385	7.638	5.8125
TCGA-B8-4621-01A	9.3593	7.8692	10.5235	12.0548	10.9327	8.2463	6.8914	7.6298	5.2867
TCGA-CZ-5460-01A	8.4184	6.5311	10.5631	12.2829	11.3492	6.8123	7.2824	7.6288	5.5249
TCGA-B0-5120-01A	8.3964	7.4054	11.4294	12.4276	12.0281	3.7338	7.4117	7.6284	6.6411
TCGA-B0-5084-01A	7.1717	5.3044	10.3465	11.1328	10.9928	8.9345	7.8538	7.6255	6.0691
TCGA-CW-5589-01A	8.9403	7.3211	10.7617	12.2726	11.7015	4.4862	7.4599	7.6255	5.7029
TCGA-EU-5905-01A	8.2803	6.9229	10.9658	12.458	11.8075	4.9797	7.5693	7.6066	5.9567
TCGA-BP-4790-01A	8.3996	6.8442	10.7979	11.6293	11.2604	4.0381	6.7317	7.6056	5.5353
TCGA-CW-5584-01A	8.0928	6.5858	10.8655	12.0522	11.9361	4.2632	7.2576	7.6034	5.4531
TCGA-B2-4101-01A	9.1035	8.178	10.5503	11.7935	12.0953	7.2453	7.4776	7.5965	5.8304
TCGA-B8-4154-01A	8.5548	6.8712	10.7037	13.286	12.0286	6.1712	7.4423	7.5944	5.3807
TCGA-CZ-5467-01A	8.4434	6.2954	10.7962	11.8328	11.5917	0.9988	7.0238	7.5877	5.7437
TCGA-DV-5569-01A	7.8357	6.171	10.9862	12.661	11.8613	5.704	7.1946	7.5848	5.596
TCGA-B4-5836-01A	7.5498	6.2457	10.3782	12.0715	11.8162	7.9245	8.0201	7.5598	6.8599
TCGA-AK-3428-01A	6.9733	5.1422	10.4693	12.2074	11.0176	7.4074	7.6072	7.5327	6.0318
TCGA-B2-5639-01A	8.6546	7.1269	10.7251	11.9995	11.783	6.3291	6.8421	7.5299	5.1135
TCGA-B0-4836-01A	6.6782	5.6847	9.5015	12.3518	10.427	6.3389	7.1289	7.5274	5.4745
TCGA-A3-3324-01A	7.5055	7.0604	10.5455	11.5818	12.0363	5.6113	7.2774	7.522	5.3521
TCGA-B2-5633-01A	8.0128	6.7586	11.0211	12.1043	12.0036	5.8888	7.215	7.516	5.2983
TCGA-DV-5575-01A	8.0389	6.6003	11.0313	12.1496	11.6082	4.1339	7.3871	7.5134	5.8402
TCGA-B0-5694-01A	8.4408	6.7286	10.3979	12.4907	11.6215	5.8257	7.2248	7.5084	5.7343
TCGA-CJ-4882-01A	8.6905	7.1125	10.8505	11.8374	11.2906	4.7772	7.9194	7.502	6.1092
TCGA-B0-5095-01A	7.6743	7.0825	10.5199	11.977	11.5397	5.6082	7.5049	7.454	6.2323
TCGA-BP-4342-01A	6.6548	7.1456	10.5646	12.7257	11.5602	5.0423	7.6854	7.4508	5.7989
TCGA-CJ-4899-01A	8.3174	7.3768	10.8815	12.2587	11.1087	3.1675	7.3768	7.4466	6.1761
TCGA-CZ-4856-01A	8.8433	7.3752	10.6976	12.375	11.5596	4.6718	7.0337	7.442	5.5566
TCGA-B0-5088-01A	9.7479	8.0057	10.6647	12.7615	10.6175	4.4584	7.4479	7.4384	6.3888
TCGA-CJ-6033-01A	8.5932	6.8166	10.7815	12.1139	11.8506	4.438	8.5196	7.4249	7.0713
TCGA-B2-4102-01A	8.8528	8.2755	10.6533	12.1895	12.6428	7.7175	7.3807	7.4112	6.0641
TCGA-BP-4964-01A	7.6934	6.5611	10.1771	12.1791	11.3812	0.7214	7.1541	7.4066	5.6619
TCGA-A3-3349-01A	6.6857	5.6424	10.9723	12.6156	11.2175	6.8815	7.0929	7.3964	5.2408
TCGA-B0-4713-01A	5.2224	5.7858	8.8887	12.2764	10.6812	4.9101	7.3058	7.3821	6.0531
TCGA-A3-3307-01A	7.3194	6.6906	10.7011	12.1856	11.8688	7.0007	7.3722	7.3802	6.0171
TCGA-BP-4799-01A	7.63	5.0991	10.1669	11.5689	10.9649	4.2896	7.7247	7.3759	6.2209
TCGA-B0-4841-01A	6.3282	3.6632	9.2612	12.144	10.7113	2.5027	7.0663	7.3709	5.1226
TCGA-B0-5701-01A	8.0403	6.1675	9.8804	11.7364	10.9897	5.5568	6.7378	7.3681	4.6897
TCGA-CJ-4892-01A	6.2907	6.667	9.7523	12.4235	12.0298	6.3881	7.7384	7.3572	6.3305
TCGA-A3-3359-01A	7.8243	7.8529	10.8552	12.4915	12.0941	7.4771	7.0488	7.3546	5.4309
TCGA-B8-5553-01A	8.6776	7.9053	10.8055	12.1308	12.2669	7.2662	7.3211	7.3511	5.3009
TCGA-BP-5185-01A	6.7754	4.4041	9.5346	12.8095	10.4309	3.7536	7.2092	7.3433	5.801
TCGA-BP-4327-01A	7.9522	6.5301	10.5201	12.4832	10.9172	1.8429	7.7093	7.3421	6.2889
TCGA-BP-4325-01A	6.5453	6.9431	9.9928	12.2149	12.0455	6.2461	7.5754	7.335	6.8559
TCGA-BP-4977-01A	7.8321	7.3461	10.8681	11.9209	11.6407	5.1223	7.0098	7.3322	5.5715
TCGA-CZ-5461-01A	8.689	7.0179	11.1698	12.3757	12.8945	5.5639	7.2736	7.3269	5.9323
TCGA-BP-4967-01A	7.7461	7.0694	10.4148	12.6003	11.4223	4.7627	6.9159	7.3114	5.3356
TCGA-CJ-4634-01A	8.0137	6.6239	10.1924	12.412	12.1243	4.5597	7.4431	7.3103	5.9737
TCGA-B0-5696-01A	6.1094	5.2087	10.0659	12.36	11.1752	5.0157	7.1213	7.2917	5.0626
TCGA-DV-5566-01A	5.6731	4.4208	10.0404	12.4483	10.7906	4.8868	7.3289	7.2871	5.0734
TCGA-A3-3308-01A	7.5167	6.9429	10.4814	11.9262	11.655	4.7383	7.1103	7.2859	5.3382
TCGA-B0-5110-01A	7.2991	6.5003	10.1328	12.0118	11.1235	6.8402	7.4624	7.2854	5.9292
TCGA-CJ-4904-01A	7.0039	5.2995	10.5841	12.0338	11.0545	4.4255	6.7214	7.2596	5.2414
TCGA-BP-4344-01A	8.3229	7.1353	10.2569	12.2029	11.6807	3.7326	7.3185	7.2524	5.387
TCGA-A3-3343-01A	8.6977	7.4669	10.8237	12.5392	11.5404	6.3846	6.9988	7.2381	5.3453
TCGA-BP-5006-01A	7.1035	6.0211	10.4513	12.1989	11.1671	6.0211	6.9328	7.2195	5.2268
TCGA-BP-4982-01A	7.1116	7.3794	10.6909	12.0296	12.1602	6.4993	6.9168	7.2195	5.5855
TCGA-CJ-5680-01A	7.1126	5.5555	10.2838	11.9794	11.7087	5.7172	6.9512	7.2177	4.9698
TCGA-CZ-5989-01A	7.3021	5.2088	10.8659	8.7806	12.6732	4.2267	7.5743	7.2109	4.9577
TCGA-CJ-4908-01A	7.0502	6.8152	10.34	12.1401	11.468	2.5621	6.8653	7.2108	5.9967
TCGA-BP-5174-01A	7.0485	4.8856	8.8404	12.2635	10.2329	1.1532	6.7204	7.1963	5.5578
TCGA-B0-5085-01A	6.9732	6.1485	9.7576	12.5747	10.317	2.6031	8.0679	7.1949	6.9667
TCGA-BP-4985-01A	7.215	5.4502	10.3182	12.2013	11.2113	7.1612	6.9096	7.1922	5.1043
TCGA-B0-4811-01A	7.1566	5.9066	10.4667	12.1517	10.3545	5.2226	7.0344	7.1829	5.6584
TCGA-B0-5705-01A	6.3535	5.3913	10.1351	12.0991	11.5005	6.0754	6.7642	7.1739	5.115
TCGA-BP-5173-01A	6.0737	5.0072	9.7357	12.2913	11.1752	4.8139	7.3029	7.1733	6.1352
TCGA-AK-3434-01A	3.7452	4.3745	9.4843	12.4455	11.033	5.3393	7.4721	7.1726	4.752
TCGA-BP-4988-01A	9.3663	8.5813	10.3617	11.9656	11.429	4.6148	7.9244	7.1592	6.9001
TCGA-B4-5377-01A	7.3785	6.4002	10.2633	12.1715	11.9917	5.3152	6.9157	7.1577	5.3604
TCGA-CJ-4907-01A	7.5243	6.3853	10.5827	12.3946	11.5043	5.3645	6.7519	7.1559	5.3971
TCGA-BP-4166-01A	7.2745	5.779	10.6926	12.6197	11.5216	5.2894	6.6029	7.1526	5.3727
TCGA-BP-4975-01A	7.79	6.4103	10.4144	12.2132	11.5623	6.5225	7.1195	7.1507	5.4939
TCGA-B0-4837-01A	5.7494	5.0302	9.6876	12.259	11.3649	6.368	7.3884	7.146	5.4181
TCGA-CJ-4878-01A	6.7654	5.6138	9.8317	11.9048	10.2679	5.6788	6.8454	7.1275	5.953
TCGA-CJ-4912-01A	7.9193	6.4978	9.7374	11.7981	10.9079	5.0073	6.897	7.1145	5.2495
TCGA-A3-3331-01A	7.5272	7.2611	10.904	12.5409	11.7636	7.5646	7.0694	7.0969	5.5228
TCGA-AK-3460-01A	8.7203	7.2254	10.4527	12.3617	11.3598	4.7441	6.8715	7.0824	5.5185
TCGA-BP-4761-01A	7.5437	4.6154	9.056	12.9386	10.6076	4.427	7.8048	7.0756	5.8955
TCGA-EU-5906-01A	8.5013	7.6304	10.6678	12.0222	11.588	8.0702	6.6513	7.0755	4.9025
TCGA-A3-3326-01A	8.5655	7.5306	10.1221	12.4089	11.0247	7.1945	6.7677	7.0723	5.4595
TCGA-B0-5402-01A	5.4688	4.414	9.5413	11.9487	10.786	5.7938	6.8375	7.0512	5.3065
TCGA-B8-5549-01A	6.0557	5.5079	10.5961	12.6237	12.0966	6.472	6.6001	7.0493	4.8175
TCGA-BP-4326-01A	6.7028	6.4953	10.8119	12.0322	11.5421	7.1776	6.7375	7.0452	5.3635
TCGA-A3-3373-01A	8.9431	7.5327	10.5186	12.2449	10.708	6.4445	6.853	6.9984	5.8795
TCGA-B0-4693-01A	7.727	6.9224	10.4886	11.7967	11.7991	6.7795	6.6475	6.9966	4.853
TCGA-B0-4849-01A	8.0199	7.4501	10.9255	12.1314	11.7212	6.07	6.8646	6.9781	5.7624
TCGA-BP-4334-01A	3.6989	3.2573	9.0219	11.6769	9.6373	4.6909	6.9871	6.9772	5.3357
TCGA-B0-5710-01A	7.1458	6.1306	10.0376	11.7974	11.1157	3.9899	6.677	6.976	5.2563
TCGA-BP-5008-01A	7.4309	6.2645	10.6461	12.1938	11.2163	8.3143	6.8413	6.9745	5.9232
TCGA-A3-3372-01A	6.216	6.8273	10.4064	11.747	12.0683	6.8186	6.6525	6.9715	5.1338
TCGA-B0-5712-01A	6.6367	4.8039	9.2984	12.0957	10.3078	1.9824	6.6632	6.9482	5.0486
TCGA-CZ-5987-01A	7.5574	6.7093	11.1581	12.2822	12.2288	6.528	6.5807	6.912	5.0851
TCGA-BP-5190-01A	7.1777	5.6527	10.2574	12.0532	10.6184	3.7487	6.6383	6.9056	5.2946
TCGA-B0-5707-01A	8.8788	6.7435	9.3247	11.884	9.843	6.0926	6.5125	6.9025	4.5883
TCGA-B0-5812-01A	7.8001	6.2897	10.3321	12.0574	11.5382	5.9813	7.2341	6.9004	5.4552
TCGA-EU-5907-01A	6.2159	4.9179	10.16	11.8939	11.0484	3.1197	6.931	6.9002	4.9896
TCGA-CJ-5683-01A	6.8483	5.2665	10.3656	12.7084	11.2	3.9839	6.539	6.8966	4.6172
TCGA-CJ-4897-01A	6.361	5.2435	10.2673	12.302	11.1951	4.4914	6.507	6.8892	4.5416
TCGA-A3-3306-01A	7.5008	7.0885	10.0983	12.0843	11.2657	6.7005	6.8504	6.8824	5.3524
TCGA-BP-4973-01A	6.6092	7.0413	10.7306	11.9179	11.8109	6.8607	6.3893	6.8676	4.9867
TCGA-B0-5077-01A	5.6076	5.8677	9.4556	11.9059	11.1716	4.8016	6.4073	6.8602	4.553
TCGA-BP-5176-01A	7.4158	5.3915	9.6562	12.4443	11.0136	1.5613	6.8993	6.8595	4.9804
TCGA-A3-3335-01A	8.3122	7.3091	10.5938	11.8871	11.7095	7.1858	6.3182	6.8454	4.7315
TCGA-CZ-5459-01A	7.101	6.5034	10.3807	12.6363	10.7606	5.7642	6.3912	6.8451	4.7905
TCGA-B0-5094-01A	5.9242	5.8623	9.5284	11.8803	11.3466	6.2133	7.1417	6.8315	6.1257
TCGA-BP-4759-01A	7.0742	6.9918	10.5196	12.4998	10.0878	5.0687	6.4757	6.8283	4.6803
TCGA-B0-4821-01A	6.4915	3.5391	8.3445	12.9197	9.3244	2.4401	6.7566	6.8145	4.9793
TCGA-B2-5636-01A	6.8218	5.3786	10.0705	11.9897	11.0431	6.5736	6.348	6.7978	4.3745
TCGA-CZ-4853-01A	6.3271	6.0208	9.5947	12.1696	11.0526	4.7074	6.4427	6.7943	4.9351
TCGA-BP-5202-01A	6.0359	5.5223	9.5337	12.1136	11.3619	3.7869	6.7732	6.7811	5.0513
TCGA-BP-4965-01A	7.105	5.8843	10.6856	11.8135	12.0275	6.7398	6.482	6.777	5.6565
TCGA-BP-4766-01A	7.096	6.5979	10.4128	12.2171	11.1869	7.4848	6.3004	6.7642	4.878
TCGA-BP-4993-01A	7.312	5.9156	10.1687	12.5232	11.0869	4.0729	6.8402	6.7634	5.4895
TCGA-B0-4818-01A	7.3163	6.5584	10.3609	12.4208	11.7073	7.9651	6.8432	6.7631	6.0171
TCGA-CJ-4885-01A	6.7951	4.7267	9.9789	12.1849	11.1805	4.7648	7.4694	6.7482	5.6184
TCGA-BP-4776-01A	7.6275	6.3393	9.772	12.7752	10.227	3.8527	7.1481	6.7436	5.9674
TCGA-AK-3455-01A	7.2468	6.3037	9.1435	11.5557	10.451	5.8017	6.2431	6.7387	5.3218
TCGA-CJ-5682-01A	6.482	4.1216	10.318	12.111	11.095	5.7948	6.3289	6.7323	4.6021
TCGA-CJ-6032-01A	7.0351	5.2642	9.6778	11.9085	11.0992	3.592	6.5976	6.7229	5.1536
TCGA-B0-5100-01A	4.5691	2.4485	9.2569	12.1008	9.9711	6.36	7.1531	6.7003	5.7563
TCGA-B0-4852-01A	7.7874	6.726	10.2116	11.3436	11.0545	6.9634	7.0584	6.6754	6.1868
TCGA-CJ-5679-01A	6.6624	4.7045	9.3559	12.3239	9.7799	3.7274	5.9594	6.6706	4.4966
TCGA-B0-5691-01A	7.3656	6.3057	10.6782	12.1408	10.6001	6.2443	6.7436	6.6676	4.5578
TCGA-B0-5121-01A	7.5386	6.205	10.2599	12.204	11.0192	6.8112	7.0064	6.6667	5.2409
TCGA-A3-3367-01A	9.186	7.9641	10.9746	11.9003	11.3377	6.1729	6.6753	6.6579	4.8067
TCGA-BP-4961-01A	5.8528	4.9751	10.2251	12.1658	10.9498	5.2071	6.1036	6.6444	4.5203
TCGA-B0-5711-01A	8.1131	6.4284	10.2081	11.9505	10.9275	5.6669	6.5201	6.6322	5.2646
TCGA-CZ-5451-01A	6.7475	5.3697	10.2547	12.4059	10.749	5.2928	6.6085	6.6274	5.0896
TCGA-BP-5181-01A	6.1155	5.0746	9.9773	12.6878	11.0811	5.7911	6.2399	6.6253	4.7397
TCGA-BP-4332-01A	6.8315	4.9704	9.9421	12.2799	10.3754	3.9481	6.3908	6.6249	5.54
TCGA-CJ-4639-01A	7.0893	6.3217	9.848	12.0873	11.2376	3.6646	6.8735	6.6116	5.5598
TCGA-BP-5194-01A	7.2825	5.7611	9.7453	12.1653	11.05	4.8791	6.3933	6.6105	4.7204
TCGA-A3-3325-01A	9.3293	7.9503	11.0998	12.2741	11.2363	6.3614	6.5624	6.6103	5.6407
TCGA-CJ-4870-01A	6.5534	4.9155	9.7605	12.9219	10.6284	6.1685	6.5326	6.6009	4.9368
TCGA-B0-5399-01A	8.3477	6.7446	10.346	12.3788	9.4205	3.4614	6.5871	6.5977	4.9563
TCGA-BP-4987-01A	6.1742	6.6012	10.0145	12.1755	11.4694	6.1364	6.8235	6.5962	5.394
TCGA-B8-5165-01A	6.2279	4.8117	10.1989	12.2372	10.5718	6.6686	6.2161	6.5933	4.3982
TCGA-BP-4991-01A	7.1034	6.6392	10.6887	12.128	11.2337	7.261	6.739	6.5922	5.365
TCGA-B0-5700-01A	7.2664	5.8418	9.9464	12.7619	10.4922	4.5501	6.4847	6.5918	4.2781
TCGA-BP-4349-01A	6.597	6.9003	9.9603	12.1889	10.8325	3.075	6.9661	6.5913	5.6008
TCGA-B0-5699-01A	7.4525	6.5883	10.146	12.1129	10.8669	6.2688	6.3772	6.5776	4.8023
TCGA-BP-4775-01A	7.0012	6.6269	9.8536	12.1996	10.6077	7.3899	6.6763	6.5756	5.046
TCGA-BP-5004-01A	6.1319	5.4661	10.2222	11.6875	11.0336	4.6339	6.4323	6.5579	5.1734
TCGA-BP-4995-01A	6.3836	5.5084	10.3468	11.6105	10.9048	6.5008	6.2259	6.546	4.6642
TCGA-CZ-5988-01A	5.3754	4.52	9.9523	11.6237	11.2503	3.9132	6.6114	6.5434	5.253
TCGA-B0-4710-01A	7.6907	6.9851	9.974	12.2986	10.6855	7.4421	6.5206	6.5375	5.2771
TCGA-BP-4165-01A	5.6314	5.3058	9.3161	12.8145	11.0499	3.9562	7.0133	6.5335	5.4615
TCGA-A3-3352-01A	7.7195	6.4864	10.414	12.1081	11.3233	5.2974	6.4447	6.5266	4.3518
TCGA-B0-5690-01A	6.3436	5.9697	9.5911	12.3195	11.0651	4.6311	6.2164	6.525	4.559
TCGA-BP-4352-01A	5.9353	4.3457	8.1935	10.0121	9.2783	1.2129	6.8151	6.5228	5.0854
TCGA-BP-5001-01A	5.7961	6.3285	9.5091	12.7074	9.819	2.8969	7.0601	6.5197	5.5586
TCGA-AK-3450-01A	7.133	5.2908	9.9663	12.5123	10.0483	4.0431	5.923	6.518	4.4936
TCGA-A3-3362-01A	7.1045	6.5247	10.5846	12.2724	11.2586	7.031	6.3665	6.5104	4.728
TCGA-B0-4814-01A	7.6213	6.3741	9.4203	12.1895	10.9454	5.9249	6.3289	6.5087	5.0448
TCGA-B0-4945-01A	7.0448	6.0799	10.029	11.7167	11.083	3.2564	6.3743	6.4872	5.4222
TCGA-A3-3322-01A	8.8114	7.7697	10.5669	12.0152	10.6344	6.2041	6.8702	6.4823	5.2508
TCGA-B4-5834-01A	7.1023	6.5306	9.6211	12.3749	10.8209	4.0444	6.151	6.4764	4.3597
TCGA-CZ-5458-01A	9.0036	7.5803	10.7411	12.3675	11.4876	4.7844	5.8962	6.4755	4.4672
TCGA-BP-5184-01A	7.6829	6.4885	10.3339	13.1069	10.5335	3.7609	6.4446	6.474	4.2432
TCGA-AS-3778-01A	8.0258	7.0294	10.6449	12.981	10.8259	5.9567	6.2985	6.4458	4.4015
TCGA-B0-5713-01A	5.7259	4.796	9.122	12.0164	11.4707	5.0729	6.5305	6.4411	5.5359
TCGA-BP-5007-01A	7.4546	6.6234	10.3377	12.5815	11.4961	4.9997	6.7613	6.4327	6.1544
TCGA-BP-4763-01A	6.3085	4.9956	10.1394	11.7795	10.7935	5.3338	6.7299	6.4209	5.3338
TCGA-A3-3376-01A	8.7034	7.8712	11.1471	12.3669	11.7216	6.4331	6.6195	6.4034	4.9092
TCGA-BP-4341-01A	4.1869	4.8644	8.8145	12.6532	11.011	5.1972	6.7669	6.4016	5.3386
TCGA-B4-5843-01A	7.6451	6.1065	10.5934	11.8132	10.5557	3.5983	6.1983	6.4015	4.256
TCGA-CJ-4905-01A	6.9193	5.8588	9.7662	12.1836	10.5541	5.6169	5.9866	6.3666	4.3299
TCGA-BP-4994-01A	5.9743	5.4512	10.3166	11.4565	10.3723	6.2855	5.8864	6.3618	4.6834
TCGA-AK-3444-01A	6.2955	5.1916	8.9533	12.2391	10.8946	5.837	6.1624	6.3564	4.048
TCGA-BP-4768-01A	6.909	6.3873	9.5674	12.4832	10.8492	3.9684	6.2209	6.3531	4.8419
TCGA-B0-5119-01A	6.7767	5.8864	9.4885	12.5367	12.0465	5.5428	6.2119	6.3415	4.6454
TCGA-B4-5832-01A	7.8143	5.0494	11.0287	9.2986	12.4964	5.6092	8.1441	6.3386	6.4369
TCGA-BP-4164-01A	6.5583	5.384	9.9904	11.9617	11.0148	4.4736	6.111	6.3168	5.756
TCGA-CZ-5465-01A	7.7938	6.6853	10.3951	11.6924	11.056	4.4011	6.6889	6.3163	5.8148
TCGA-BP-4347-01A	6.6234	6.1024	9.9527	11.447	10.7481	4.5205	6.2042	6.309	4.8197
TCGA-A3-3313-01A	6.9926	6.6271	9.3982	11.1094	10.6348	5.2325	6.0962	6.3072	4.8639
TCGA-CJ-4876-01A	5.1746	3.9727	9.3238	12.0555	9.4879	1.1538	6.2504	6.3036	4.0097
TCGA-A3-3380-01A	7.6371	6.0973	10.391	12.7491	10.1707	6.8501	6.1348	6.2892	4.3307
TCGA-BP-4337-01A	7.0543	5.814	10.0985	12.112	10.0587	2.942	6.9798	6.2789	6.036
TCGA-BP-4795-01A	7.9988	6.2712	10.2734	12.1948	10.6916	5.9632	6.0156	6.2774	4.4457
TCGA-B0-4696-01A	4.9888	3.8913	9.2693	10.9965	9.3655	5.2637	6.1952	6.2749	4.7068
TCGA-CZ-5982-01A	6.9856	5.6864	9.8061	11.6963	10.4282	6.3588	6.1583	6.2649	5.0865
TCGA-B8-5159-01A	7.7531	6.2384	10.5099	12.208	11.6839	6.1742	6.0244	6.2643	4.2117
TCGA-BP-4756-01A	7.5477	6.6475	9.4731	11.4271	10.3947	3.078	6.3482	6.264	4.9766
TCGA-BP-4158-01A	6.8568	5.952	9.6237	12.111	10.4239	4.5523	6.6427	6.251	4.7505
TCGA-BP-4976-01A	6.4799	6.447	9.5777	12.1748	11.4326	6.0194	5.783	6.1979	4.2558
TCGA-CW-6093-01A	4.8406	4.5747	9.3625	11.7257	10.6926	6.4564	6.1967	6.1775	4.7743
TCGA-CZ-5986-01A	7.6986	6.4952	10.3397	10.9155	10.8173	5.5852	6.2337	6.1601	4.5832
TCGA-BP-5168-01A	6.1325	4.46	9.3599	12.8448	10.0139	2.6444	6.0299	6.1592	4.5436
TCGA-A3-3320-01A	7.7607	7.2456	10.7611	11.9319	11.0061	7.5804	6.5985	6.1581	5.4881
TCGA-CJ-4638-01A	5.7161	5.3228	8.2486	11.9405	8.9836	2.717	6.1291	6.1434	4.7053
TCGA-B0-5115-01A	7.1636	6.5421	10.0468	11.885	10.8327	5.235	6.1665	6.108	4.8987
TCGA-BP-5177-01A	6.7685	4.8533	9.4568	12.09	9.8442	2.8682	6.0696	6.0599	4.2136
TCGA-A3-3365-01A	6.7211	5.968	10.3584	12.0371	10.5856	4.4751	6.3145	6.0443	4.9812
TCGA-B0-5695-01A	6.1661	5.4505	9.2495	12.3507	10.4351	6.1034	5.7577	6.0378	3.7885
TCGA-B0-5693-01A	7.2739	5.9223	9.9219	12.2311	9.9767	6.6899	6.2723	6.0201	4.7313
TCGA-BP-4784-01A	6.5691	4.8906	9.2147	12.1696	9.448	1.7606	5.5961	6.0149	3.649
TCGA-BP-4774-01A	6.4619	6.0364	10.0586	12.3898	10.451	1.2943	6.687	6.0123	5.1643
TCGA-BP-4974-01A	6.4388	6.4979	10.0092	11.9041	9.9972	3.2157	6.1005	6.0044	4.2967
TCGA-AK-3458-01A	8.8965	6.6522	9.7488	12.8533	9.8904	5.6405	6.1	5.9947	4.3443
TCGA-BP-4351-01A	7.1098	7.8548	10.2036	12.6304	10.6047	2.8708	6.6793	5.9619	5.865
TCGA-EU-5904-01A	8.2611	6.4349	10.4695	12.5871	10.2643	6.1511	5.5433	5.9559	4.5409
TCGA-CW-5583-01A	5.7242	5.1445	9.5266	12.2028	9.886	7.3919	5.5836	5.9333	3.9755
TCGA-B8-4151-01A	7.1166	5.5088	10.0537	12.714	11.1839	5.7885	5.5664	5.9269	4.2895
TCGA-BP-4355-01A	6.4528	5.52	10.1842	12.3761	9.8384	2.5819	6.843	5.9157	5.9054
TCGA-B0-5116-01A	5.7753	4.1785	8.7175	12.2676	10.0157	2.7447	5.9846	5.8984	5.2961
TCGA-CZ-5453-01A	6.6386	5.4959	8.3261	12.2681	8.9687	4.6445	5.9159	5.8925	4.6814
TCGA-CW-5581-01A	7.4356	5.881	9.8056	11.9458	10.5493	3.9526	5.3123	5.8892	3.7508
TCGA-B0-4828-01A	6.619	6.2424	9.1802	12.2582	10.2369	3.8399	6.2965	5.8805	5.2282
TCGA-AK-3436-01A	6.9044	4.8145	8.4668	12.6461	10.0497	3.4234	7.1163	5.8793	5.8019
TCGA-CW-5591-01A	6.9481	5.5609	9.6799	11.7451	9.8597	4.353	5.6688	5.8448	3.7116
TCGA-BP-5186-01A	6.7326	5.0928	9.268	12.2729	10.5302	4.3838	5.9608	5.8407	5.0502
TCGA-B0-4706-01A	5.8102	5.4693	8.7151	12.156	10.8462	4.5264	5.9546	5.8001	4.2855
TCGA-AK-3454-01A	6.4143	5.8642	9.9956	12.1472	10.9014	7.4205	6.1243	5.7752	4.2355
TCGA-AK-3461-01A	6.8916	6.398	10.0618	12.184	10.5391	6.3214	5.8861	5.7498	3.7129
TCGA-BP-4760-01A	6.8411	5.5059	9.3734	11.6731	9.5051	4.7861	5.36	5.7498	3.6197
TCGA-BP-4999-01A	7.0563	6.4723	10.298	12.0469	10.4484	6.4723	6.1156	5.7387	5.1853
TCGA-B4-5844-01A	5.4465	5.1109	9.7531	11.9714	10.762	6.0329	5.6977	5.7288	4.1673
TCGA-CW-6088-01A	6.7957	6.0016	9.9925	11.8367	10.7456	6.8241	5.6428	5.6505	5.0361
TCGA-AK-3453-01A	7.0963	5.7057	8.3243	11.8065	8.5497	2.7415	5.3151	5.6395	4.2015
TCGA-B2-3923-01A	3.7906	4.246	9.0072	10.7964	9.4648	6.969	5.5769	5.616	4.0362
TCGA-B4-5378-01A	6.2686	5.5705	9.663	12.0325	10.4592	7.1383	5.7629	5.6075	3.6322
TCGA-BP-4340-01A	5.6963	5.4759	9.3476	11.7517	10.5037	5.1573	5.5501	5.5587	3.8306
TCGA-CZ-4859-01A	6.3168	5.6431	9.1619	12.2972	10.0992	5.5749	5.0127	5.4529	3.5569
TCGA-BP-4177-01A	6.8691	5.0504	9.4195	11.675	9.1803	3.2024	5.3086	5.4507	3.7708
TCGA-BP-5187-01A	6.9361	5.718	10.3074	11.7159	10.4074	1.2954	5.3576	5.4324	3.8167
TCGA-A3-3385-01A	6.6934	6.05	9.4155	12.2573	10.9559	5.8419	5.4434	5.4322	4.8086
TCGA-B0-5099-01A	5.2184	4.6072	9.3683	12.1666	8.8838	2.0414	5.1086	5.4156	3.6653
TCGA-CJ-5681-01A	7.5301	5.9736	10.001	11.3091	9.5439	4.07	4.9022	5.1936	4.0409
TCGA-AK-3440-01A	5.0053	4.3465	8.6697	11.4994	8.2186	2.6931	4.8667	5.1813	3.0266
TCGA-BP-4789-01A	6.1225	4.3302	9.0143	12.1036	9.4485	4.1405	5.0689	5.1428	3.7807
TCGA-B0-4845-01A	6.0692	5.8782	9.6385	12.4942	10.3129	5.7099	5.9338	5.1377	4.2509
TCGA-DV-5567-01A	5.3808	4.2669	8.8827	12.2416	9.7823	1.8325	4.9439	4.9882	4.0045
TCGA-BP-5192-01A	5.9385	5.447	9.1668	12.336	9.9074	3.3934	4.5008	4.8345	2.8539
TCGA-B8-4619-01A	4.8068	4.4011	8.816	11.5115	8.2815	3.207	4.8759	4.7343	3.207
TCGA-B0-5117-01A	4.5267	4.0811	8.2254	11.6191	7.5719	3.1639	5.9313	4.7023	4.4879
TCGA-BP-4969-01A	5.2523	5.1027	9.3188	12.8347	9.2163	1.6253	4.9358	4.6783	3.7999
TCGA-BP-4765-01A	6.4514	5.7547	10.3868	11.8902	10.6551	3.1668	5.2123	4.6766	3.6794
TCGA-AK-3447-01A	5.2332	4.5924	9.1897	11.2161	8.264	5.1178	5.0772	4.6489	3.651
TCGA-B0-5098-01A	5.7484	4.2765	7.0779	11.393	8.1263	4.1714	4.8364	4.5313	2.9648
TCGA-CW-5585-01A	4.8123	4.2949	8.9503	12.7294	9.8499	3.9706	5.0521	4.4458	3.6194
TCGA-B8-5546-01A	3.3206	3.2466	7.6955	11.2618	8.7231	3.0862	4.1279	4.4249	3.2466
TCGA-B0-5703-01A	4.7274	3.1949	8.8353	12.4427	9.772	6.4371	4.8084	4.1139	3.3472
TCGA-DV-5576-01A	3.9496	2.9392	8.2272	11.9379	8.9457	3.4106	4.2316	4.113	2.6294
TCGA-B0-4707-01A	4.3527	3.748	7.1465	12.6749	9.0612	3.748	4.2385	4.0483	2.5017
TCGA-BP-4769-01A	5.9048	4.693	8.3879	11.7209	8.532	1.5424	3.8848	3.6412	3.4524
TCGA-A3-3328-01A	3.3658	3.0785	6.9455	11.8314	7.814	5.6084	4.6376	3.4501	2.5764
TCGA-B0-4834-01A	2.132	3.1265	7.9929	10.7966	8.2527	2.132	3.278	1.7726	2.132

## Sheet: Sheet3
submitter_id.samples	FCGR2B	FCGR2C	FCGR2A	FCGRT	FCGR3A	FCGR3B	FCGR1B	FCGR1A	FCGR1C
TCGA-CW-6087-01A	7.3576	6.5813	12.3159	11.2382	15.0255	7.5858	10.6818	11.2417	8.9648
TCGA-AK-3426-01A	9.9752	8.4417	11.6779	12.4608	12.8269	7.2458	10.7531	11.0278	9.2214
TCGA-BP-4167-01A	10.0034	8.0036	11.9415	12.7823	13.1377	6.1145	10.1446	10.4925	8.4315
TCGA-CJ-4890-01A	10.2098	8.738	12.7101	12.6022	13.4104	4.0239	9.6917	10.2139	8.0773
TCGA-B0-4690-01A	9.8799	9.1076	12.1283	11.7024	14.0379	9.488	9.8371	10.15	8.0618
TCGA-B8-5551-01A	10.8308	9.2923	12.5583	12.8135	14.2182	5.1782	9.9751	10.0885	8.9454
TCGA-CZ-4861-01A	11.6422	10.4631	12.236	12.1849	14.15	9.5534	9.529	10.0538	7.9472
TCGA-BP-4173-01A	9.5249	9.1383	11.9432	12.0314	14.1902	8.2076	9.6291	10.0062	7.9263
TCGA-B8-5162-01A	9.9098	8.2029	12.6016	13.0626	14.3107	7.3467	9.3792	9.9578	7.9549
TCGA-CJ-4637-01A	9.4096	8.0163	11.3196	11.8834	13.6018	3.6627	9.482	9.8821	7.6167
TCGA-B0-4712-01A	9.1196	7.7717	11.028	11.6186	12.4689	4.867	9.6275	9.8309	8.6164
TCGA-B0-4694-01A	9.6992	8.1407	11.3817	13.0341	13.8397	7.2139	9.2755	9.8141	7.7567
TCGA-BP-4354-01A	10.2801	9.3202	13.2674	12.3691	14.1435	10.6393	9.5644	9.7821	8.5182
TCGA-B0-5702-01A	6.6229	2.7525	9.0313	12.2562	12.017	5.2043	8.9666	9.7148	7.5618
TCGA-CJ-4873-01A	10.0887	8.0669	11.8135	12.562	12.5742	4.8235	9.602	9.6896	7.8591
TCGA-B0-5081-01A	9.7256	8.4957	11.4391	12.0155	13.2995	6.0762	9.4107	9.6822	8.1968
TCGA-CJ-4888-01A	9.1346	7.7343	11.5386	12.0556	13.3201	6.426	9.5622	9.6383	8.3787
TCGA-BP-5191-01A	9.413	7.4255	11.2616	12.5734	12.4299	4.9734	9.8957	9.5916	8.2738
TCGA-CW-6090-01A	9.7566	8.2957	11.9505	12.4869	13.122	6.8527	8.9777	9.5334	7.3538
TCGA-CJ-6027-01A	7.4621	6.1267	11.0207	12	12.9764	5.4135	9.0892	9.5013	7.6054
TCGA-CJ-5676-01A	7.2014	5.208	11.0549	12.9136	12.6775	5.0901	8.9366	9.4677	7.4561
TCGA-CJ-6030-01A	9.891	7.8618	12.1786	12.4924	14.2259	3.8684	9.1321	9.4553	7.2779
TCGA-CZ-5454-01A	10.9724	9.556	11.7658	12.7831	13.5405	7.4847	8.9996	9.451	8.0709
TCGA-B0-4700-01A	7.9098	6.4306	11.1111	12.2883	12.363	5.1097	9.4773	9.427	7.6629
TCGA-CJ-5671-01A	8.7782	7.2944	11.6208	12.6814	13.0048	3.715	8.9088	9.4266	7.1913
TCGA-CJ-4901-01A	8.4254	7.4005	10.9193	12.1618	12.7602	5.6305	9.287	9.4096	7.8152
TCGA-AK-3425-01A	8.8956	7.0317	10.9264	12.9658	12.8099	2.5881	8.9316	9.3896	7.3961
TCGA-BP-4989-01A	8.5474	7.8473	10.8571	11.7813	12.8322	5.4878	9.5782	9.3826	7.8897
TCGA-B0-4842-01A	8.0848	5.3569	9.9439	12.1025	12.1517	9.45	9.3514	9.3665	7.4119
TCGA-BP-4960-01A	8.5986	7.8944	11.3127	12.6866	12.6891	5.9665	9.0697	9.3275	7.4467
TCGA-CJ-4895-01A	9.0797	7.2341	11.6665	11.9139	13.6627	3.4181	9.0048	9.3221	7.3317
TCGA-BP-4983-01A	10.6218	9.0702	11.8414	11.349	13.3814	6.2993	8.8038	9.3187	7.2133
TCGA-B0-4697-01A	8.9399	7.9696	11.0561	11.8309	12.0539	4.7059	9.1624	9.3108	7.5591
TCGA-B0-4815-01A	8.4418	7.6257	10.6832	12.0874	13.2631	7.0092	9.6456	9.2987	8.4032
TCGA-B0-4819-01A	8.8532	8.3989	10.9287	12.172	11.8776	5.8414	9.1885	9.2709	7.589
TCGA-CJ-5677-01A	9.2601	7.1677	11.6421	12.7306	12.6997	3.8571	8.7269	9.264	7.0441
TCGA-BP-4787-01A	9.9794	8.4466	11.7257	12.3712	13.1852	8.3268	8.9289	9.2364	7.4829
TCGA-B8-A54G-01A	9.5225	8.5038	12.0803	12.3839	13.6699	4.5512	9.21	9.2342	7.3307
TCGA-BP-4777-01A	9.1425	7.5333	11.1073	12.34	12.6455	6.2812	8.7941	9.2122	7.1808
TCGA-B0-4847-01A	7.4496	7.3626	11.0545	12.1492	12.2972	5.9768	9.4139	9.1717	7.7825
TCGA-B8-5164-01A	9.2521	8.3263	11.073	11.9828	13.0363	6.4141	8.9352	9.1707	7.2169
TCGA-B8-4143-01A	6.7641	6.3381	10.7755	11.8871	12.7145	5.513	8.9318	9.1616	7.139
TCGA-BP-4343-01A	9.7604	7.805	11.5776	12.2401	13.1823	5.2234	8.771	9.1552	6.9645
TCGA-B8-5163-01A	8.4717	7.8483	11.7601	12.269	13.7479	6.8494	8.7482	9.1458	7.4565
TCGA-BP-4962-01A	9.6312	8.1213	11.2285	12.5716	12.338	5.8613	8.6592	9.1455	7.1513
TCGA-CJ-4887-01A	7.9216	7.2173	11.4535	12.6596	12.9978	5.3866	9.044	9.0835	7.3409
TCGA-BP-5182-01A	9.5623	8.0156	11.9	12.6123	11.9034	4.6649	8.5734	9.0775	6.9368
TCGA-B0-4699-01A	8.3904	7.6938	11.3781	11.4594	12.6231	5.0327	8.677	9.0703	7.0143
TCGA-A3-3378-01A	9.4644	9.3974	12.2102	12.1266	13.9417	10.5143	9.0419	9.05	7.7533
TCGA-CJ-4636-01A	9.0786	8.2805	11.5512	12.215	12.9679	5.8358	8.8336	9.046	7.3994
TCGA-CJ-4881-01A	8.9221	7.734	11.3002	12.0606	12.9201	8.6777	8.9288	9.0241	7.782
TCGA-CJ-6031-01A	9.3048	7.6478	11.4485	12.8371	12.694	6.0905	8.9484	9.0173	7.1771
TCGA-BP-5009-01A	8.6547	7.4308	11.0824	11.9931	12.7969	3.5712	8.7881	9.0112	7.247
TCGA-BP-5199-01A	7.0942	5.8395	10.0566	12.2645	11.6784	1.8794	8.6649	8.9992	7.1998
TCGA-B0-5400-01A	7.7337	5.6473	10.6031	12.4932	11.2495	9.0264	8.6291	8.9987	7.9917
TCGA-BP-4176-01A	10.5223	8.779	12.1116	12.6313	12.3954	8.5803	8.3786	8.9936	6.7838
TCGA-CJ-4900-01A	10.4671	8.9785	12.328	12.2043	13.0221	5.2808	8.6044	8.992	7.067
TCGA-CJ-4641-01A	9.2236	8.1281	11.0436	12.1784	12.1198	5.2275	8.9964	8.978	7.0207
TCGA-BP-4972-01A	9.6056	8.0898	11.7626	12.4693	11.8998	7.1538	8.5351	8.9775	6.9752
TCGA-A3-3346-01A	10.798	9.4062	11.5582	12.7809	12.8315	8.7954	8.5716	8.9714	7.1573
TCGA-CJ-5672-01A	8.1458	6.7403	11.0407	12.5485	12.9519	5.8911	8.5852	8.9514	6.9982
TCGA-B2-4098-01A	10.0082	8.7454	11.2515	11.3468	12.1119	7.9567	8.5765	8.9497	6.8117
TCGA-B2-3924-01A	6.6134	5.6887	10.8725	12.5351	13.3544	6.6077	8.8578	8.9383	7.2402
TCGA-B0-4810-01A	8.2	6.4733	10.9864	12.3774	12.0029	5.3263	8.8395	8.9366	7.2149
TCGA-B2-5641-01A	8.9282	7.9705	11.0378	12.4602	13.3212	7.3416	8.2976	8.9217	6.8057
TCGA-BP-4804-01A	8.5898	6.9512	10.9532	12.487	12.6066	3.5013	8.9272	8.9187	7.2681
TCGA-BP-5169-01A	9.3004	7.5506	10.9835	11.8235	12.0725	4.7364	9.3987	8.9004	8.297
TCGA-BP-4160-01A	8.4308	6.7053	10.7861	12.2484	13.0518	4.8964	8.4976	8.8945	6.4912
TCGA-CZ-5456-01A	9.9747	8.8179	10.6291	12.2095	11.6519	6.2513	8.2332	8.8922	6.7655
TCGA-CJ-5678-01A	9.6643	7.1526	11.1411	12.9193	12.1566	4.6226	9.0567	8.891	7.5259
TCGA-CJ-5675-01A	7.7535	6.2003	10.7399	12.2111	13.6955	4.55	8.4741	8.8899	6.8571
TCGA-CZ-5452-01A	8.6034	7.9866	10.6428	12.3092	12.909	8.4464	8.5248	8.8853	6.8681
TCGA-B0-5108-01A	10.026	8.7864	12.2171	12.1716	13.2033	6.6119	8.9364	8.8777	7.6239
TCGA-DV-5574-01A	8.2957	6.4729	11.9521	12.3825	12.8616	5.5771	8.4957	8.8774	6.8291
TCGA-CJ-4916-01A	8.9888	7.518	11.2019	12.2693	12.9903	5.399	8.5113	8.8593	6.953
TCGA-B0-4822-01A	7.6371	4.4537	10.546	12.6602	11.6941	4.9319	8.8059	8.8585	7.2911
TCGA-B0-5692-01A	7.7095	5.8533	10.4859	11.9952	12.285	4.5633	8.4568	8.8584	6.7333
TCGA-CJ-4868-01A	8.6475	7.1417	11.5098	12.4575	12.5371	5.6129	8.6099	8.8496	6.8315
TCGA-BP-5175-01A	7.4669	6.4289	10.4145	11.6359	11.8358	7.3453	8.5443	8.8447	6.2402
TCGA-B0-5697-01A	8.813	7.3733	10.8483	11.6818	12.8859	7.0473	8.6062	8.8443	7.0049
TCGA-CZ-5470-01A	8.9306	7.1555	10.732	11.9686	12.4727	6.0545	8.5744	8.8431	6.9451
TCGA-BP-4163-01A	9.2287	8.2196	10.8381	11.8986	12.3236	3.9305	8.4912	8.834	7.4349
TCGA-BP-5170-01A	8.3511	5.8431	11.1004	12.7554	11.7547	3.7977	8.3783	8.8331	6.8605
TCGA-CZ-4857-01A	8.6475	7.9695	10.9561	12.6779	12.6732	7.3764	8.8112	8.8157	7.1767
TCGA-BP-4771-01A	7.8423	8.0598	10.8673	11.9897	13.0594	6.3944	9.5118	8.8145	7.7273
TCGA-B0-5083-01A	9.9123	7.8673	11.5308	11.7989	11.0559	2.5778	8.367	8.8102	6.4993
TCGA-CZ-5455-01A	8.193	7.3824	10.9949	11.8831	13.0169	7.4532	8.2078	8.8013	6.9377
TCGA-B0-4824-01A	8.0423	7.0776	10.4675	12.4926	12.5761	6.5507	8.6022	8.7765	7.0668
TCGA-B0-4688-01A	9.0047	7.4579	11.7635	11.6462	12.4629	2.7816	8.5086	8.7712	6.9757
TCGA-CJ-4891-01A	9.1936	7.2293	11.5811	11.4619	11.831	8.6087	8.7497	8.7697	6.9374
TCGA-B0-5709-01A	9.139	7.8338	11.0394	11.9589	12.8292	6.0306	8.1893	8.7538	6.4144
TCGA-CZ-5464-01A	8.0813	7.0373	10.731	12.6678	12.5939	6.0551	8.2608	8.7445	6.7259
TCGA-CZ-4864-01A	9.5752	8.6531	10.9462	11.867	13.3437	7.0832	8.2689	8.7367	6.7317
TCGA-B0-4827-01A	8.5058	6.5137	11.2793	12.2061	12.5475	6.1467	8.6327	8.7315	6.885
TCGA-BP-4807-01A	9.3692	8.4549	11.3592	12.8082	11.9513	7.6525	8.5657	8.7306	6.8554
TCGA-CJ-4869-01A	8.417	6.4857	11.0731	12.4651	12.6555	5.3048	8.439	8.7283	6.3621
TCGA-CJ-4923-01A	7.7303	6.8943	10.3196	11.6756	11.818	4.785	8.3973	8.7228	6.8647
TCGA-BP-4346-01A	7.6622	7.9319	10.7625	11.8578	12.8611	3.9806	8.93	8.7197	7.2513
TCGA-A3-3319-01A	8.4412	7.7085	10.8305	11.2038	12.8196	5.5403	8.6055	8.7175	7.5534
TCGA-B0-4714-01A	7.4107	7.7577	10.5784	12.0797	12.418	5.6244	9.0722	8.7055	7.5238
TCGA-B0-4848-01A	9.7592	7.4408	11.203	12.2012	12.5585	4.2103	8.2338	8.689	6.7732
TCGA-CZ-4858-01A	6.5304	6.2124	11.0042	11.4966	12.6398	6.0626	8.6332	8.678	7.571
TCGA-B0-5106-01A	7.5839	7.5288	11.2385	12.4276	12.8639	6.8112	8.7753	8.6742	7.8372
TCGA-AK-3445-01A	7.8195	7.5228	11.112	12.6595	12.7394	5.1078	8.2377	8.6699	6.8635
TCGA-A3-3347-01A	9.2919	9.1396	12.0342	12.1843	13.3564	6.2216	8.6543	8.6696	7.2938
TCGA-CJ-5686-01A	8.9091	7.6996	10.9869	11.7307	12.6822	6.0659	8.5106	8.6439	6.9516
TCGA-B8-A54I-01A	9.7939	7.9911	11.6213	12.6383	12.7971	5.006	9.2585	8.6375	8.2898
TCGA-B0-5107-01A	8.7008	6.7528	9.9277	12.0805	12.0651	3.8213	8.4921	8.6324	6.9547
TCGA-BP-4161-01A	8.2604	7.5777	10.5368	12.0851	12.3119	6.4367	8.3966	8.6184	6.8745
TCGA-BP-5198-01A	9.8967	8.2215	11.3688	12.0738	12.2782	6.2521	7.9743	8.6096	6.2872
TCGA-B2-4099-01A	7.0703	5.6363	10.4773	12.8273	12.8916	6.081	8.7171	8.6091	7.6608
TCGA-BP-4353-01A	7.0523	5.8747	11.5032	12.1939	12.6826	3.5263	8.5117	8.6056	7.0223
TCGA-BP-4345-01A	9.6443	7.8262	11.1243	12.1195	12.0369	1.163	8.1176	8.6046	6.9064
TCGA-DV-5573-01A	7.4902	8.0558	10.4894	11.954	12.8588	6.6572	8.2984	8.5949	6.8451
TCGA-B0-4718-01A	7.7207	7.0162	10.6744	12.0871	11.5943	0.7575	8.2055	8.5885	6.8535
TCGA-CZ-4863-01A	6.0216	6.2628	10.2225	11.5417	13.5471	5.6383	8.3365	8.5856	6.8338
TCGA-B0-5092-01A	7.5867	7.3072	10.3534	11.8491	12.1706	5.4862	8.8366	8.5811	7.6737
TCGA-CZ-5468-01A	7.4494	6.0013	10.8459	11.8613	12.0099	4.1305	8.3017	8.5716	6.8655
TCGA-BP-4174-01A	7.1931	6.7035	10.5369	11.7062	12.4674	7.2213	8.0125	8.5605	6.1197
TCGA-B0-5109-01A	8.1858	7.0894	10.3221	10.6173	11.6476	9.2784	8.441	8.5535	6.6887
TCGA-BP-5189-01A	8.2386	7.8696	11.701	11.9504	13.0448	6.2896	8.1602	8.5488	6.6148
TCGA-CJ-6028-01A	6.9149	5.3372	10.9715	11.7458	12.6887	5.6486	8.1015	8.5447	7.0217
TCGA-A3-3358-01A	10.0651	8.3448	11.4319	12.3429	12.0986	5.6885	8.491	8.5398	7.0994
TCGA-B0-4839-01A	8.8899	6.6761	11.6983	12.7848	12.8572	5.9508	8.4924	8.5338	7.3585
TCGA-CZ-5985-01A	8.7242	7.288	10.9884	12.2206	12.6786	5.49	8.3418	8.5302	6.7016
TCGA-G6-A5PC-01A	7.2164	4.779	9.798	12.0149	11.2059	3.3997	8.7925	8.5224	6.7879
TCGA-B0-4698-01A	8.0604	6.8023	11.0197	10.62	12.7421	9.2709	8.1268	8.5178	6.7621
TCGA-CJ-4640-01A	9.1092	7.2247	11.0594	12.4558	13.4146	3.556	8.739	8.515	7.5922
TCGA-CW-5587-01A	7.1289	5.4617	10.4033	11.9957	12.7088	6.0504	8.0688	8.5027	6.0431
TCGA-B0-5075-01A	9.7261	8.4207	11.2373	12.3438	12.5905	5.6276	8.0708	8.4967	6.5542
TCGA-A3-3387-01A	10.1894	9.0139	12.0642	11.9652	12.8617	6.6666	8.2011	8.492	6.7387
TCGA-BP-4758-01A	5.7819	4.9508	10.4263	12.8324	11.7924	5.1215	8.3722	8.4829	6.4412
TCGA-CJ-4884-01A	8.6301	7.2816	10.641	12.0613	12.1724	4.8037	8.2035	8.4799	6.7221
TCGA-CZ-4860-01A	9.997	8.1478	11.1794	11.6432	12.5078	3.4167	8.2319	8.4726	6.5885
TCGA-CW-5588-01A	8.3914	6.8515	11.1418	12.3887	12.8656	7.2095	7.8882	8.4462	5.8314
TCGA-B0-4843-01A	7.408	5.7786	9.8422	12.309	10.917	6.6206	8.2705	8.4446	6.6948
TCGA-CJ-4918-01A	8.3733	6.7571	11.2604	12.2712	12.4034	5.1932	7.9276	8.4384	6.7349
TCGA-B0-4823-01A	8.0259	7.3794	11.1208	12.5029	12.4691	4.8021	7.9861	8.437	6.3322
TCGA-CJ-4644-01A	8.229	7.1947	10.4319	12.3227	11.561	5.408	7.8466	8.4303	6.2379
TCGA-B8-5158-01A	9.031	7.4287	11.1906	11.8224	12.7663	7.9288	8.2551	8.4271	6.6016
TCGA-BP-4986-01A	8.4106	7.3858	11.4126	11.5915	12.974	6.9895	8.2544	8.4195	6.7118
TCGA-B0-5097-01A	8.8242	7.4209	12.0478	11.9738	12.4416	6.7695	8.0994	8.413	6.3242
TCGA-CJ-4894-01A	6.9372	6.6448	10.3296	12.0639	13.3036	5.553	8.3612	8.4089	7.2529
TCGA-BP-4781-01A	7.1853	6.2496	10.7264	12.7066	12.3368	6.3919	8.0017	8.3999	6.131
TCGA-CZ-4862-01A	8.4471	7.6386	10.5115	11.8465	12.6947	5.4479	8.2569	8.364	6.6621
TCGA-B8-5550-01A	8.1866	6.8909	10.9794	12.0832	12.0303	5.2673	8.0422	8.3635	6.4737
TCGA-BP-4770-01A	9.3245	6.6785	11.9198	12.2687	12.5689	2.6598	8.1976	8.3559	6.7704
TCGA-B0-4703-01A	7.4625	6.9603	10.6076	10.8886	12.1765	3.7224	7.9366	8.3496	6.3273
TCGA-B8-4620-01A	8.246	6.6365	11.4446	12.1409	12.9481	10.2025	7.8936	8.3367	6.1998
TCGA-DV-5568-01A	8.2073	7.225	10.6745	12.7094	11.5493	5.1675	7.927	8.3194	6.2431
TCGA-BP-5201-01A	6.8082	6.5032	10.5099	12.4587	11.6707	1.5567	8.4421	8.3177	6.6443
TCGA-AK-3429-01A	8.3694	5.9327	10.2522	12.5708	12.2258	4.4291	8.2158	8.3122	6.538
TCGA-BP-4782-01A	7.169	6.1568	10.5423	12.3315	12.1641	2.4383	7.9335	8.3118	6.371
TCGA-B0-5706-01A	8.0309	6.9808	10.1198	12.1344	11.9072	5.4733	7.769	8.3044	5.9494
TCGA-BP-4797-01A	8.2811	6.7617	10.8053	12.0527	12.2972	7.1796	7.8041	8.2489	6.1071
TCGA-BP-4971-01A	7.9602	7.6052	10.5932	11.524	10.9471	3.723	8.3909	8.2412	6.675
TCGA-B8-A54F-01A	8.3099	8.1566	11.3337	12.4	12.3779	5.5751	8.3177	8.2412	6.981
TCGA-BP-4992-01A	7.6067	7.6415	10.4643	11.7198	11.4343	3.9343	8.6501	8.2371	7.6562
TCGA-CJ-4903-01A	8.6572	7.2356	11.108	12.2146	12.4211	4.0057	7.8552	8.2189	6.7991
TCGA-BP-5183-01A	7.0477	6.6569	9.8876	12.3473	11.9175	4.7382	7.9115	8.2184	6.372
TCGA-BP-4970-01A	9.1647	7.9577	11.3753	12.0043	13.9107	5.7872	7.6891	8.2111	6.3164
TCGA-MM-A84U-01A	8.4594	6.5626	9.9986	12.6471	11.3641	3.324	8.1517	8.2105	6.3298
TCGA-BP-5196-01A	6.9616	6.3917	10.5961	12.206	12.0648	1.5915	8.0154	8.2085	6.5977
TCGA-A3-3329-01A	7.8072	6.8664	10.5119	12.3851	12.3387	6.1619	8.2878	8.1985	6.4911
TCGA-AK-3431-01A	7.4094	5.6716	10.5761	12.1447	11.4486	5.521	7.86	8.1974	6.1761
TCGA-CJ-4893-01A	7.7637	6.6276	10.1764	12.234	13.207	5.6198	7.7718	8.1756	6.1301
TCGA-BP-4169-01A	8.9715	7.9604	11.7885	12.3829	12.266	8.8453	7.9303	8.1755	6.3968
TCGA-B0-4844-01A	6.4242	5.5401	9.7751	13.0942	11.3575	5.6411	7.8228	8.1683	6.2434
TCGA-B0-4813-01A	6.818	6.3839	10.0646	11.9463	11.1078	6.0245	8.8495	8.1635	7.1582
TCGA-A3-3316-01A	7.8299	7.5759	11.3151	12.1317	12.2048	7.2417	8.0825	8.1495	6.7339
TCGA-CJ-4875-01A	6.9391	6.0347	9.46	12.4741	11.4043	4.5376	8.3055	8.1475	6.882
TCGA-CZ-5462-01A	7.3391	5.9978	10.3148	11.7247	12.1237	8.9779	8.1562	8.1438	6.3561
TCGA-BP-4162-01A	7.3785	6.7998	10.5154	11.888	12.3316	6.8285	7.6784	8.1428	6.0886
TCGA-B0-4838-01A	5.8378	6.2744	10.5085	11.7827	12.13	5.5068	8.1619	8.1372	6.7404
TCGA-B8-5545-01A	7.9585	6.7668	11.0505	12.287	12.5128	7.044	7.9125	8.1273	6.4932
TCGA-B2-5635-01A	9.3986	8.2836	11.2878	11.964	13.4566	6.8908	8.1042	8.1248	6.8812
TCGA-BP-4968-01A	7.192	5.3325	10.1989	12.6282	11.8633	3.972	7.9683	8.1142	6.5589
TCGA-BP-4959-01A	9.5972	7.9435	11.4405	12.4471	11.4836	4.1269	7.904	8.1016	6.5854
TCGA-DV-5565-01A	6.6937	4.6762	10.6735	12.4483	10.6656	4.3145	7.5945	8.0808	5.5492
TCGA-CZ-5466-01A	9.8036	8.0387	10.8473	12.6891	11.5659	2.9163	7.7724	8.0796	6.14
TCGA-A3-3351-01A	8.2622	8.5437	11.4342	12.1711	13.0511	6.0694	8.1733	8.0784	6.6746
TCGA-AK-3451-01A	9.2062	6.4973	9.6438	12.8873	9.4521	5.2484	7.7848	8.0682	5.9304
TCGA-BP-4170-01A	8.2021	6.6923	11.6381	12.5858	12.5138	7.3954	7.7091	8.0642	6.1549
TCGA-BP-5178-01A	9.915	8.2829	12.4326	12.5076	12.0491	4.4432	7.6504	8.0561	6.6576
TCGA-B8-A54D-01A	9.1322	8.4205	10.9765	11.8038	11.9557	6.5283	8.3632	8.0535	6.831
TCGA-BP-4330-01A	7.4941	7.4865	10.5731	12.2153	12.381	7.8608	7.8899	8.0395	6.3787
TCGA-CZ-5457-01A	7.444	6.1112	10.7895	12.3542	12.1484	6.474	7.9585	8.0023	6.9846
TCGA-B0-5113-01A	8.2817	8.2097	10.6452	11.615	12.1305	6.2436	7.7314	7.9941	6.2627
TCGA-BP-4159-01A	7.6961	5.3149	10.2434	12.4438	12.2178	3.4589	7.7757	7.9911	6.2191
TCGA-CZ-4865-01A	8.2959	6.334	11.0641	12.3718	12.4011	5.6132	7.6291	7.9902	5.6348
TCGA-BP-4338-01A	7.7831	6.5778	10.9127	12.4745	11.9751	5.0895	7.5209	7.9888	5.9321
TCGA-B8-4148-01A	6.7015	7.6393	10.5919	11.9299	12.735	4.539	8.013	7.9816	6.5384
TCGA-CJ-4635-01A	7.8323	7.7137	10.5082	12.499	11.9436	4.8574	7.826	7.9766	6.2568
TCGA-BP-5000-01A	7.9145	6.3967	10.5677	12.5774	11.7487	4.3545	8.1138	7.9702	6.4941
TCGA-CW-6097-01A	8.3984	6.9734	11.0248	11.7826	12.3835	6.5376	7.5698	7.9699	5.7372
TCGA-BP-4335-01A	7.1384	6.6789	10.1714	12.3109	11.1837	2.6737	8.0933	7.966	6.1796
TCGA-B0-4691-01A	8.4115	6.9366	10.0821	12.4218	11.4041	3.9069	7.7814	7.9542	6.1189
TCGA-B0-5080-01A	7.7644	5.6692	10.4185	12.2651	11.0943	4.2794	7.8508	7.9527	6.5106
TCGA-CJ-4902-01A	7.9193	6.9252	11.1711	12.4963	12.0043	4.9211	7.5347	7.9391	6.1044
TCGA-CZ-5469-01A	8.2283	5.2915	9.9253	12.9845	10.9034	3.2595	7.5278	7.9163	6.281
TCGA-CZ-4866-01A	7.5464	6.7796	9.6547	11.9706	12.0916	3.7138	7.6649	7.9137	6.0973
TCGA-CJ-4874-01A	8.7362	7.3189	10.6689	12.4256	12.3319	5.1623	7.6489	7.8953	5.898
TCGA-CJ-4920-01A	8.3816	7.1766	10.5599	11.9866	12.2136	5.0926	8.0101	7.8923	6.994
TCGA-A3-3382-01A	8.8866	7.5192	11.2341	12.0861	12.5233	5.7891	7.7851	7.8761	6.0719
TCGA-BP-4801-01A	9.9422	8.268	11.3335	12.7512	10.8295	4.5833	7.993	7.8566	6.3018
TCGA-BP-4963-01A	8.8883	8.1363	11.5825	12.0311	12.2592	6.0737	7.7111	7.8543	6.4376
TCGA-CZ-5984-01A	9.2608	7.9151	10.8939	12.6024	12.247	5.3903	7.5688	7.838	5.6495
TCGA-BP-4331-01A	7.5424	7.2134	10.3062	12.4219	12.1321	7.1955	7.8942	7.8218	6.4296
TCGA-CW-5590-01A	6.6423	5.2352	10.5592	11.9195	11.5587	3.8035	7.482	7.8213	5.7833
TCGA-A3-3323-01A	8.5873	8.63	11.103	12.1717	12.6498	5.7933	7.7285	7.8082	6.2422
TCGA-CJ-4889-01A	9.155	7.7704	10.8738	12.2318	12.0226	3.293	7.3943	7.8057	5.6657
TCGA-BP-4762-01A	8.4458	6.7164	10.8687	12.6862	11.9083	6.0404	7.6135	7.7948	5.7997
TCGA-A3-3363-01A	9.5771	7.8546	10.5106	12.0305	11.1559	6.5902	7.5827	7.7923	6.5852
TCGA-A3-3370-01A	7.0614	7.2387	10.638	12.0139	12.4245	6.4004	7.4582	7.7869	5.7744
TCGA-B0-5698-01A	9.2698	8.0862	11.3909	12.0329	12.1561	7.2495	7.5852	7.7831	5.926
TCGA-BP-4981-01A	7.6637	7.2424	10.7985	12.481	11.4966	2.0398	7.9475	7.7805	6.3001
TCGA-CW-5580-01A	8.3696	7.0276	10.8034	11.6381	11.4367	6.0766	7.2462	7.7756	5.4675
TCGA-CJ-4872-01A	8.9068	7.383	11.128	12.2886	11.4696	5.8633	7.8056	7.7736	6.6125
TCGA-CJ-4886-01A	8.0058	5.9386	10.3279	12.2448	12.0065	4.467	7.549	7.7695	5.9474
TCGA-B4-5835-01A	8.0587	5.7156	10.1071	11.1187	10.9977	3.8422	7.406	7.7649	5.8277
TCGA-CJ-4643-01A	7.8918	7.1075	11.2093	12.057	11.6875	4.9911	7.5589	7.7544	6.2208
TCGA-A3-A6NJ-01A	8.4948	7.5719	10.7375	12.4552	12.3313	6.014	7.5131	7.7407	6.0923
TCGA-B0-4833-01A	6.836	6.2206	9.944	12.4089	11.4864	4.8007	8.1191	7.7332	5.9639
TCGA-B0-5102-01A	7.8493	6.3368	10.1767	12.5897	11.4932	3.5385	7.507	7.7323	5.9747
TCGA-A3-3383-01A	9.4741	7.0522	10.7235	13.5365	11.8718	6.711	8.2129	7.7297	6.7761
TCGA-B0-4846-01A	6.7944	6.7482	10.6042	11.815	12.0921	6.7622	7.4675	7.7297	6.1465
TCGA-BP-5195-01A	8.1668	7.0984	11.1056	12.5134	12.7066	7.7043	7.4591	7.7248	5.6504
TCGA-BP-5200-01A	8.223	7.0414	10.9926	12.0506	11.9966	7.7827	7.5759	7.72	6.3575
TCGA-A3-3374-01A	9.5258	7.6061	11.0681	12.366	9.7367	5.7021	7.2823	7.7155	6.0539
TCGA-B0-4816-01A	9.8232	8.834	12.1242	12.8366	13.1788	7.1505	7.3719	7.7143	6.0943
TCGA-B0-4817-01A	7.9905	6.4131	10.9184	12.7484	11.2436	12.4566	7.9013	7.7134	6.1148
TCGA-A3-A6NI-01A	8.6443	7.6058	10.5783	12.7421	11.4883	5.7368	7.7746	7.7114	6.1426
TCGA-BP-5010-01A	6.8966	6.7427	9.9392	12.4021	10.5942	4.6845	7.9338	7.7029	5.993
TCGA-A3-3357-01A	6.9595	6.3822	10.8393	12.1889	12.4825	6.9634	7.2462	7.7019	5.4277
TCGA-A3-3311-01A	6.715	6.5085	10.6755	12.0614	12.5382	6.6349	7.8628	7.6963	6.5807
TCGA-BP-5180-01A	8.908	7.1326	10.8418	12.9875	12.0649	4.5304	7.3561	7.691	5.6375
TCGA-CJ-5684-01A	6.8458	5.6249	10.3158	12.32	11.3493	2.8163	7.4516	7.687	5.749
TCGA-CZ-4854-01A	6.2411	6.1394	9.8521	12.2353	11.5514	4.7799	7.4775	7.685	6.3621
TCGA-BP-4329-01A	9.0951	7.5601	10.9233	12.5367	11.4323	5.4616	7.3869	7.6763	5.5773
TCGA-BP-4803-01A	8.239	6.62	10.268	12.3714	11.4823	2.3648	7.0804	7.6725	5.7503
TCGA-B0-4701-01A	8.841	7.8814	10.8073	11.782	10.7628	5.3369	7.9303	7.6699	6.3189
TCGA-CJ-4871-01A	7.4461	5.6577	10.1346	12.4046	12.1833	4.7179	7.2011	7.6664	5.5198
TCGA-A3-3317-01A	7.634	7.5513	10.5122	11.7151	11.6724	3.3001	7.4876	7.6657	6.1359
TCGA-BP-4998-01A	9.8423	8.5646	11.3131	12.1519	12.4131	6.7387	7.3841	7.6556	5.8527
TCGA-B8-4622-01A	8.9662	7.7719	10.9199	12.1522	12.2958	6.9473	7.7719	7.6403	6.6815
TCGA-AK-3456-01A	8.7418	6.9836	10.107	11.4442	10.8438	6.5984	7.1585	7.6382	5.642
TCGA-CZ-5463-01A	7.1302	6.4221	10.3425	11.6467	11.741	5.9148	6.8385	7.638	5.8125
TCGA-B8-4621-01A	9.3593	7.8692	10.5235	12.0548	10.9327	8.2463	6.8914	7.6298	5.2867
TCGA-CZ-5460-01A	8.4184	6.5311	10.5631	12.2829	11.3492	6.8123	7.2824	7.6288	5.5249
TCGA-B0-5120-01A	8.3964	7.4054	11.4294	12.4276	12.0281	3.7338	7.4117	7.6284	6.6411
TCGA-B0-5084-01A	7.1717	5.3044	10.3465	11.1328	10.9928	8.9345	7.8538	7.6255	6.0691
TCGA-CW-5589-01A	8.9403	7.3211	10.7617	12.2726	11.7015	4.4862	7.4599	7.6255	5.7029
TCGA-EU-5905-01A	8.2803	6.9229	10.9658	12.458	11.8075	4.9797	7.5693	7.6066	5.9567
TCGA-BP-4790-01A	8.3996	6.8442	10.7979	11.6293	11.2604	4.0381	6.7317	7.6056	5.5353
TCGA-CW-5584-01A	8.0928	6.5858	10.8655	12.0522	11.9361	4.2632	7.2576	7.6034	5.4531
TCGA-A3-A6NN-01A	8.2706	7.5024	10.8561	12.4967	11.862	5.541	7.6664	7.5994	5.969
TCGA-B2-4101-01A	9.1035	8.178	10.5503	11.7935	12.0953	7.2453	7.4776	7.5965	5.8304
TCGA-B8-4154-01A	8.5548	6.8712	10.7037	13.286	12.0286	6.1712	7.4423	7.5944	5.3807
TCGA-CZ-5467-01A	8.4434	6.2954	10.7962	11.8328	11.5917	0.9988	7.0238	7.5877	5.7437
TCGA-DV-5569-01A	7.8357	6.171	10.9862	12.661	11.8613	5.704	7.1946	7.5848	5.596
TCGA-B4-5836-01A	7.5498	6.2457	10.3782	12.0715	11.8162	7.9245	8.0201	7.5598	6.8599
TCGA-AK-3428-01A	6.9733	5.1422	10.4693	12.2074	11.0176	7.4074	7.6072	7.5327	6.0318
TCGA-B2-5639-01A	8.6546	7.1269	10.7251	11.9995	11.783	6.3291	6.8421	7.5299	5.1135
TCGA-B0-4836-01A	6.6782	5.6847	9.5015	12.3518	10.427	6.3389	7.1289	7.5274	5.4745
TCGA-A3-3324-01A	7.5055	7.0604	10.5455	11.5818	12.0363	5.6113	7.2774	7.522	5.3521
TCGA-B2-5633-01A	8.0128	6.7586	11.0211	12.1043	12.0036	5.8888	7.215	7.516	5.2983
TCGA-DV-5575-01A	8.0389	6.6003	11.0313	12.1496	11.6082	4.1339	7.3871	7.5134	5.8402
TCGA-B0-5694-01A	8.4408	6.7286	10.3979	12.4907	11.6215	5.8257	7.2248	7.5084	5.7343
TCGA-CJ-4882-01A	8.6905	7.1125	10.8505	11.8374	11.2906	4.7772	7.9194	7.502	6.1092
TCGA-G6-A8L6-01A	7.7609	6.3187	11.2034	12.5868	12.1196	4.863	7.9843	7.5019	5.7304
TCGA-B8-A8YJ-01A	7.639	6.7168	10.8559	12.8168	11.8425	6.0753	7.5862	7.4974	5.7304
TCGA-B0-5095-01A	7.6743	7.0825	10.5199	11.977	11.5397	5.6082	7.5049	7.454	6.2323
TCGA-BP-4342-01A	6.6548	7.1456	10.5646	12.7257	11.5602	5.0423	7.6854	7.4508	5.7989
TCGA-CJ-4899-01A	8.3174	7.3768	10.8815	12.2587	11.1087	3.1675	7.3768	7.4466	6.1761
TCGA-CZ-4856-01A	8.8433	7.3752	10.6976	12.375	11.5596	4.6718	7.0337	7.442	5.5566
TCGA-B0-5088-01A	9.7479	8.0057	10.6647	12.7615	10.6175	4.4584	7.4479	7.4384	6.3888
TCGA-CJ-6033-01A	8.5932	6.8166	10.7815	12.1139	11.8506	4.438	8.5196	7.4249	7.0713
TCGA-B2-4102-01A	8.8528	8.2755	10.6533	12.1895	12.6428	7.7175	7.3807	7.4112	6.0641
TCGA-BP-4964-01A	7.6934	6.5611	10.1771	12.1791	11.3812	0.7214	7.1541	7.4066	5.6619
TCGA-A3-3349-01A	6.6857	5.6424	10.9723	12.6156	11.2175	6.8815	7.0929	7.3964	5.2408
TCGA-B0-4713-01A	5.2224	5.7858	8.8887	12.2764	10.6812	4.9101	7.3058	7.3821	6.0531
TCGA-A3-3307-01A	7.3194	6.6906	10.7011	12.1856	11.8688	7.0007	7.3722	7.3802	6.0171
TCGA-BP-4799-01A	7.63	5.0991	10.1669	11.5689	10.9649	4.2896	7.7247	7.3759	6.2209
TCGA-B0-4841-01A	6.3282	3.6632	9.2612	12.144	10.7113	2.5027	7.0663	7.3709	5.1226
TCGA-B0-5701-01A	8.0403	6.1675	9.8804	11.7364	10.9897	5.5568	6.7378	7.3681	4.6897
TCGA-CJ-4892-01A	6.2907	6.667	9.7523	12.4235	12.0298	6.3881	7.7384	7.3572	6.3305
TCGA-A3-3359-01A	7.8243	7.8529	10.8552	12.4915	12.0941	7.4771	7.0488	7.3546	5.4309
TCGA-B8-5553-01A	8.6776	7.9053	10.8055	12.1308	12.2669	7.2662	7.3211	7.3511	5.3009
TCGA-BP-5185-01A	6.7754	4.4041	9.5346	12.8095	10.4309	3.7536	7.2092	7.3433	5.801
TCGA-BP-4327-01A	7.9522	6.5301	10.5201	12.4832	10.9172	1.8429	7.7093	7.3421	6.2889
TCGA-A3-A6NL-01A	7.9662	7.5708	10.8218	12.5948	12.0484	6.1246	7.3254	7.342	5.8847
TCGA-BP-4325-01A	6.5453	6.9431	9.9928	12.2149	12.0455	6.2461	7.5754	7.335	6.8559
TCGA-BP-4977-01A	7.8321	7.3461	10.8681	11.9209	11.6407	5.1223	7.0098	7.3322	5.5715
TCGA-CZ-5461-01A	8.689	7.0179	11.1698	12.3757	12.8945	5.5639	7.2736	7.3269	5.9323
TCGA-BP-4967-01A	7.7461	7.0694	10.4148	12.6003	11.4223	4.7627	6.9159	7.3114	5.3356
TCGA-CJ-4634-01A	8.0137	6.6239	10.1924	12.412	12.1243	4.5597	7.4431	7.3103	5.9737
TCGA-B0-5696-01A	6.1094	5.2087	10.0659	12.36	11.1752	5.0157	7.1213	7.2917	5.0626
TCGA-DV-5566-01A	5.6731	4.4208	10.0404	12.4483	10.7906	4.8868	7.3289	7.2871	5.0734
TCGA-A3-3308-01A	7.5167	6.9429	10.4814	11.9262	11.655	4.7383	7.1103	7.2859	5.3382
TCGA-B0-5110-01A	7.2991	6.5003	10.1328	12.0118	11.1235	6.8402	7.4624	7.2854	5.9292
TCGA-CJ-4904-01A	7.0039	5.2995	10.5841	12.0338	11.0545	4.4255	6.7214	7.2596	5.2414
TCGA-BP-4344-01A	8.3229	7.1353	10.2569	12.2029	11.6807	3.7326	7.3185	7.2524	5.387
TCGA-A3-3343-01A	8.6977	7.4669	10.8237	12.5392	11.5404	6.3846	6.9988	7.2381	5.3453
TCGA-G6-A8L7-01A	3.1932	2.3429	6.7264	12.0513	8.7609	5.0254	7.9568	7.2354	6.3657
TCGA-BP-5006-01A	7.1035	6.0211	10.4513	12.1989	11.1671	6.0211	6.9328	7.2195	5.2268
TCGA-BP-4982-01A	7.1116	7.3794	10.6909	12.0296	12.1602	6.4993	6.9168	7.2195	5.5855
TCGA-CJ-5680-01A	7.1126	5.5555	10.2838	11.9794	11.7087	5.7172	6.9512	7.2177	4.9698
TCGA-CZ-5989-01A	7.3021	5.2088	10.8659	8.7806	12.6732	4.2267	7.5743	7.2109	4.9577
TCGA-CJ-4908-01A	7.0502	6.8152	10.34	12.1401	11.468	2.5621	6.8653	7.2108	5.9967
TCGA-BP-5174-01A	7.0485	4.8856	8.8404	12.2635	10.2329	1.1532	6.7204	7.1963	5.5578
TCGA-B0-5085-01A	6.9732	6.1485	9.7576	12.5747	10.317	2.6031	8.0679	7.1949	6.9667
TCGA-BP-4985-01A	7.215	5.4502	10.3182	12.2013	11.2113	7.1612	6.9096	7.1922	5.1043
TCGA-B0-4811-01A	7.1566	5.9066	10.4667	12.1517	10.3545	5.2226	7.0344	7.1829	5.6584
TCGA-B0-5705-01A	6.3535	5.3913	10.1351	12.0991	11.5005	6.0754	6.7642	7.1739	5.115
TCGA-BP-5173-01A	6.0737	5.0072	9.7357	12.2913	11.1752	4.8139	7.3029	7.1733	6.1352
TCGA-B8-A54J-01A	6.7299	6.0289	9.8562	12.6901	10.4904	6.0289	6.9533	7.1733	5.1152
TCGA-AK-3434-01A	3.7452	4.3745	9.4843	12.4455	11.033	5.3393	7.4721	7.1726	4.752
TCGA-6D-AA2E-01A	6.3942	5.3742	9.4991	12.4525	10.1882	3.1851	6.7886	7.17	5.0609
TCGA-BP-4988-01A	9.3663	8.5813	10.3617	11.9656	11.429	4.6148	7.9244	7.1592	6.9001
TCGA-B4-5377-01A	7.3785	6.4002	10.2633	12.1715	11.9917	5.3152	6.9157	7.1577	5.3604
TCGA-CJ-4907-01A	7.5243	6.3853	10.5827	12.3946	11.5043	5.3645	6.7519	7.1559	5.3971
TCGA-BP-4166-01A	7.2745	5.779	10.6926	12.6197	11.5216	5.2894	6.6029	7.1526	5.3727
TCGA-BP-4975-01A	7.79	6.4103	10.4144	12.2132	11.5623	6.5225	7.1195	7.1507	5.4939
TCGA-B0-4837-01A	5.7494	5.0302	9.6876	12.259	11.3649	6.368	7.3884	7.146	5.4181
TCGA-CJ-4878-01A	6.7654	5.6138	9.8317	11.9048	10.2679	5.6788	6.8454	7.1275	5.953
TCGA-CJ-4912-01A	7.9193	6.4978	9.7374	11.7981	10.9079	5.0073	6.897	7.1145	5.2495
TCGA-A3-3331-01A	7.5272	7.2611	10.904	12.5409	11.7636	7.5646	7.0694	7.0969	5.5228
TCGA-AK-3460-01A	8.7203	7.2254	10.4527	12.3617	11.3598	4.7441	6.8715	7.0824	5.5185
TCGA-BP-4761-01A	7.5437	4.6154	9.056	12.9386	10.6076	4.427	7.8048	7.0756	5.8955
TCGA-EU-5906-01A	8.5013	7.6304	10.6678	12.0222	11.588	8.0702	6.6513	7.0755	4.9025
TCGA-A3-3326-01A	8.5655	7.5306	10.1221	12.4089	11.0247	7.1945	6.7677	7.0723	5.4595
TCGA-B0-5402-01A	5.4688	4.414	9.5413	11.9487	10.786	5.7938	6.8375	7.0512	5.3065
TCGA-B8-5549-01A	6.0557	5.5079	10.5961	12.6237	12.0966	6.472	6.6001	7.0493	4.8175
TCGA-BP-4326-01A	6.7028	6.4953	10.8119	12.0322	11.5421	7.1776	6.7375	7.0452	5.3635
TCGA-B8-A54H-01A	6.9082	6.3478	9.6739	12.4722	11.6023	5.457	7.0449	7.0293	5.7439
TCGA-3Z-A93Z-01A	6.1293	4.8999	9.7801	12.7354	11.0417	4.1135	7.0455	7.0179	5.4272
TCGA-A3-3373-01A	8.9431	7.5327	10.5186	12.2449	10.708	6.4445	6.853	6.9984	5.8795
TCGA-B0-4693-01A	7.727	6.9224	10.4886	11.7967	11.7991	6.7795	6.6475	6.9966	4.853
TCGA-B0-4849-01A	8.0199	7.4501	10.9255	12.1314	11.7212	6.07	6.8646	6.9781	5.7624
TCGA-BP-4334-01A	3.6989	3.2573	9.0219	11.6769	9.6373	4.6909	6.9871	6.9772	5.3357
TCGA-B0-5710-01A	7.1458	6.1306	10.0376	11.7974	11.1157	3.9899	6.677	6.976	5.2563
TCGA-BP-5008-01A	7.4309	6.2645	10.6461	12.1938	11.2163	8.3143	6.8413	6.9745	5.9232
TCGA-A3-3372-01A	6.216	6.8273	10.4064	11.747	12.0683	6.8186	6.6525	6.9715	5.1338
TCGA-B0-5712-01A	6.6367	4.8039	9.2984	12.0957	10.3078	1.9824	6.6632	6.9482	5.0486
TCGA-CZ-5987-01A	7.5574	6.7093	11.1581	12.2822	12.2288	6.528	6.5807	6.912	5.0851
TCGA-BP-5190-01A	7.1777	5.6527	10.2574	12.0532	10.6184	3.7487	6.6383	6.9056	5.2946
TCGA-B0-5707-01A	8.8788	6.7435	9.3247	11.884	9.843	6.0926	6.5125	6.9025	4.5883
TCGA-B0-5812-01A	7.8001	6.2897	10.3321	12.0574	11.5382	5.9813	7.2341	6.9004	5.4552
TCGA-EU-5907-01A	6.2159	4.9179	10.16	11.8939	11.0484	3.1197	6.931	6.9002	4.9896
TCGA-CJ-5683-01A	6.8483	5.2665	10.3656	12.7084	11.2	3.9839	6.539	6.8966	4.6172
TCGA-CJ-4897-01A	6.361	5.2435	10.2673	12.302	11.1951	4.4914	6.507	6.8892	4.5416
TCGA-A3-3306-01A	7.5008	7.0885	10.0983	12.0843	11.2657	6.7005	6.8504	6.8824	5.3524
TCGA-BP-4973-01A	6.6092	7.0413	10.7306	11.9179	11.8109	6.8607	6.3893	6.8676	4.9867
TCGA-B0-5077-01A	5.6076	5.8677	9.4556	11.9059	11.1716	4.8016	6.4073	6.8602	4.553
TCGA-BP-5176-01A	7.4158	5.3915	9.6562	12.4443	11.0136	1.5613	6.8993	6.8595	4.9804
TCGA-A3-3335-01A	8.3122	7.3091	10.5938	11.8871	11.7095	7.1858	6.3182	6.8454	4.7315
TCGA-CZ-5459-01A	7.101	6.5034	10.3807	12.6363	10.7606	5.7642	6.3912	6.8451	4.7905
TCGA-B0-5094-01A	5.9242	5.8623	9.5284	11.8803	11.3466	6.2133	7.1417	6.8315	6.1257
TCGA-BP-4759-01A	7.0742	6.9918	10.5196	12.4998	10.0878	5.0687	6.4757	6.8283	4.6803
TCGA-B0-4821-01A	6.4915	3.5391	8.3445	12.9197	9.3244	2.4401	6.7566	6.8145	4.9793
TCGA-B2-5636-01A	6.8218	5.3786	10.0705	11.9897	11.0431	6.5736	6.348	6.7978	4.3745
TCGA-CZ-4853-01A	6.3271	6.0208	9.5947	12.1696	11.0526	4.7074	6.4427	6.7943	4.9351
TCGA-BP-5202-01A	6.0359	5.5223	9.5337	12.1136	11.3619	3.7869	6.7732	6.7811	5.0513
TCGA-BP-4965-01A	7.105	5.8843	10.6856	11.8135	12.0275	6.7398	6.482	6.777	5.6565
TCGA-B8-A7U6-01A	6.88	5.8723	9.7722	12.6162	11.1088	5.9377	6.7033	6.7694	5.6562
TCGA-BP-4766-01A	7.096	6.5979	10.4128	12.2171	11.1869	7.4848	6.3004	6.7642	4.878
TCGA-BP-4993-01A	7.312	5.9156	10.1687	12.5232	11.0869	4.0729	6.8402	6.7634	5.4895
TCGA-B0-4818-01A	7.3163	6.5584	10.3609	12.4208	11.7073	7.9651	6.8432	6.7631	6.0171
TCGA-CJ-4885-01A	6.7951	4.7267	9.9789	12.1849	11.1805	4.7648	7.4694	6.7482	5.6184
TCGA-BP-4776-01A	7.6275	6.3393	9.772	12.7752	10.227	3.8527	7.1481	6.7436	5.9674
TCGA-AK-3455-01A	7.2468	6.3037	9.1435	11.5557	10.451	5.8017	6.2431	6.7387	5.3218
TCGA-CJ-5682-01A	6.482	4.1216	10.318	12.111	11.095	5.7948	6.3289	6.7323	4.6021
TCGA-CJ-6032-01A	7.0351	5.2642	9.6778	11.9085	11.0992	3.592	6.5976	6.7229	5.1536
TCGA-DV-A4VX-01A	7.113	6.2298	9.7057	12.1461	10.8798	5.9217	7.4342	6.7077	5.8291
TCGA-B0-5100-01A	4.5691	2.4485	9.2569	12.1008	9.9711	6.36	7.1531	6.7003	5.7563
TCGA-B0-4852-01A	7.7874	6.726	10.2116	11.3436	11.0545	6.9634	7.0584	6.6754	6.1868
TCGA-CJ-5679-01A	6.6624	4.7045	9.3559	12.3239	9.7799	3.7274	5.9594	6.6706	4.4966
TCGA-B0-5691-01A	7.3656	6.3057	10.6782	12.1408	10.6001	6.2443	6.7436	6.6676	4.5578
TCGA-B0-5121-01A	7.5386	6.205	10.2599	12.204	11.0192	6.8112	7.0064	6.6667	5.2409
TCGA-A3-3367-01A	9.186	7.9641	10.9746	11.9003	11.3377	6.1729	6.6753	6.6579	4.8067
TCGA-B2-A4SR-01A	8.1793	7.1475	10.5141	12.0384	10.9295	5.3883	6.7475	6.6566	5.1583
TCGA-BP-4961-01A	5.8528	4.9751	10.2251	12.1658	10.9498	5.2071	6.1036	6.6444	4.5203
TCGA-B0-5711-01A	8.1131	6.4284	10.2081	11.9505	10.9275	5.6669	6.5201	6.6322	5.2646
TCGA-CZ-5451-01A	6.7475	5.3697	10.2547	12.4059	10.749	5.2928	6.6085	6.6274	5.0896
TCGA-BP-5181-01A	6.1155	5.0746	9.9773	12.6878	11.0811	5.7911	6.2399	6.6253	4.7397
TCGA-BP-4332-01A	6.8315	4.9704	9.9421	12.2799	10.3754	3.9481	6.3908	6.6249	5.54
TCGA-CJ-4639-01A	7.0893	6.3217	9.848	12.0873	11.2376	3.6646	6.8735	6.6116	5.5598
TCGA-BP-5194-01A	7.2825	5.7611	9.7453	12.1653	11.05	4.8791	6.3933	6.6105	4.7204
TCGA-A3-3325-01A	9.3293	7.9503	11.0998	12.2741	11.2363	6.3614	6.5624	6.6103	5.6407
TCGA-CJ-4870-01A	6.5534	4.9155	9.7605	12.9219	10.6284	6.1685	6.5326	6.6009	4.9368
TCGA-B0-5399-01A	8.3477	6.7446	10.346	12.3788	9.4205	3.4614	6.5871	6.5977	4.9563
TCGA-BP-4987-01A	6.1742	6.6012	10.0145	12.1755	11.4694	6.1364	6.8235	6.5962	5.394
TCGA-B8-5165-01A	6.2279	4.8117	10.1989	12.2372	10.5718	6.6686	6.2161	6.5933	4.3982
TCGA-BP-4991-01A	7.1034	6.6392	10.6887	12.128	11.2337	7.261	6.739	6.5922	5.365
TCGA-B0-5700-01A	7.2664	5.8418	9.9464	12.7619	10.4922	4.5501	6.4847	6.5918	4.2781
TCGA-BP-4349-01A	6.597	6.9003	9.9603	12.1889	10.8325	3.075	6.9661	6.5913	5.6008
TCGA-B0-5699-01A	7.4525	6.5883	10.146	12.1129	10.8669	6.2688	6.3772	6.5776	4.8023
TCGA-BP-4775-01A	7.0012	6.6269	9.8536	12.1996	10.6077	7.3899	6.6763	6.5756	5.046
TCGA-BP-5004-01A	6.1319	5.4661	10.2222	11.6875	11.0336	4.6339	6.4323	6.5579	5.1734
TCGA-BP-4995-01A	6.3836	5.5084	10.3468	11.6105	10.9048	6.5008	6.2259	6.546	4.6642
TCGA-CZ-5988-01A	5.3754	4.52	9.9523	11.6237	11.2503	3.9132	6.6114	6.5434	5.253
TCGA-B0-4710-01A	7.6907	6.9851	9.974	12.2986	10.6855	7.4421	6.5206	6.5375	5.2771
TCGA-BP-4165-01A	5.6314	5.3058	9.3161	12.8145	11.0499	3.9562	7.0133	6.5335	5.4615
TCGA-A3-3352-01A	7.7195	6.4864	10.414	12.1081	11.3233	5.2974	6.4447	6.5266	4.3518
TCGA-B0-5690-01A	6.3436	5.9697	9.5911	12.3195	11.0651	4.6311	6.2164	6.525	4.559
TCGA-BP-4352-01A	5.9353	4.3457	8.1935	10.0121	9.2783	1.2129	6.8151	6.5228	5.0854
TCGA-BP-5001-01A	5.7961	6.3285	9.5091	12.7074	9.819	2.8969	7.0601	6.5197	5.5586
TCGA-A3-A8OV-01A	7.3921	6.4408	10.0861	12.8188	11.6178	5.5132	6.7332	6.518	4.61
TCGA-AK-3450-01A	7.133	5.2908	9.9663	12.5123	10.0483	4.0431	5.923	6.518	4.4936
TCGA-A3-3362-01A	7.1045	6.5247	10.5846	12.2724	11.2586	7.031	6.3665	6.5104	4.728
TCGA-B0-4814-01A	7.6213	6.3741	9.4203	12.1895	10.9454	5.9249	6.3289	6.5087	5.0448
TCGA-MW-A4EC-01A	7.3339	6.7219	9.8003	12.8294	11.1785	4.9123	6.9058	6.5043	4.9511
TCGA-B0-4945-01A	7.0448	6.0799	10.029	11.7167	11.083	3.2564	6.3743	6.4872	5.4222
TCGA-MM-A564-01A	5.074	3.3824	9.0088	12.5135	11.2584	5.8153	7.1087	6.4856	5.1007
TCGA-A3-3322-01A	8.8114	7.7697	10.5669	12.0152	10.6344	6.2041	6.8702	6.4823	5.2508
TCGA-A3-A8CQ-01A	6.7091	6.3976	9.9615	12.4141	10.901	3.7653	6.1057	6.4787	4.2696
TCGA-B4-5834-01A	7.1023	6.5306	9.6211	12.3749	10.8209	4.0444	6.151	6.4764	4.3597
TCGA-CZ-5458-01A	9.0036	7.5803	10.7411	12.3675	11.4876	4.7844	5.8962	6.4755	4.4672
TCGA-BP-5184-01A	7.6829	6.4885	10.3339	13.1069	10.5335	3.7609	6.4446	6.474	4.2432
TCGA-AS-3778-01A	8.0258	7.0294	10.6449	12.981	10.8259	5.9567	6.2985	6.4458	4.4015
TCGA-B0-5713-01A	5.7259	4.796	9.122	12.0164	11.4707	5.0729	6.5305	6.4411	5.5359
TCGA-BP-5007-01A	7.4546	6.6234	10.3377	12.5815	11.4961	4.9997	6.7613	6.4327	6.1544
TCGA-BP-4763-01A	6.3085	4.9956	10.1394	11.7795	10.7935	5.3338	6.7299	6.4209	5.3338
TCGA-A3-3376-01A	8.7034	7.8712	11.1471	12.3669	11.7216	6.4331	6.6195	6.4034	4.9092
TCGA-BP-4341-01A	4.1869	4.8644	8.8145	12.6532	11.011	5.1972	6.7669	6.4016	5.3386
TCGA-B4-5843-01A	7.6451	6.1065	10.5934	11.8132	10.5557	3.5983	6.1983	6.4015	4.256
TCGA-CJ-4905-01A	6.9193	5.8588	9.7662	12.1836	10.5541	5.6169	5.9866	6.3666	4.3299
TCGA-BP-4994-01A	5.9743	5.4512	10.3166	11.4565	10.3723	6.2855	5.8864	6.3618	4.6834
TCGA-AK-3444-01A	6.2955	5.1916	8.9533	12.2391	10.8946	5.837	6.1624	6.3564	4.048
TCGA-BP-4768-01A	6.909	6.3873	9.5674	12.4832	10.8492	3.9684	6.2209	6.3531	4.8419
TCGA-B0-5119-01A	6.7767	5.8864	9.4885	12.5367	12.0465	5.5428	6.2119	6.3415	4.6454
TCGA-B4-5832-01A	7.8143	5.0494	11.0287	9.2986	12.4964	5.6092	8.1441	6.3386	6.4369
TCGA-B8-A54E-01A	6.2863	5.6755	9.9239	11.2689	9.9957	4.4245	6.4284	6.3211	4.4603
TCGA-BP-4164-01A	6.5583	5.384	9.9904	11.9617	11.0148	4.4736	6.111	6.3168	5.756
TCGA-CZ-5465-01A	7.7938	6.6853	10.3951	11.6924	11.056	4.4011	6.6889	6.3163	5.8148
TCGA-BP-4347-01A	6.6234	6.1024	9.9527	11.447	10.7481	4.5205	6.2042	6.309	4.8197
TCGA-A3-3313-01A	6.9926	6.6271	9.3982	11.1094	10.6348	5.2325	6.0962	6.3072	4.8639
TCGA-CJ-4876-01A	5.1746	3.9727	9.3238	12.0555	9.4879	1.1538	6.2504	6.3036	4.0097
TCGA-A3-3380-01A	7.6371	6.0973	10.391	12.7491	10.1707	6.8501	6.1348	6.2892	4.3307
TCGA-BP-4337-01A	7.0543	5.814	10.0985	12.112	10.0587	2.942	6.9798	6.2789	6.036
TCGA-BP-4795-01A	7.9988	6.2712	10.2734	12.1948	10.6916	5.9632	6.0156	6.2774	4.4457
TCGA-B0-4696-01A	4.9888	3.8913	9.2693	10.9965	9.3655	5.2637	6.1952	6.2749	4.7068
TCGA-CZ-5982-01A	6.9856	5.6864	9.8061	11.6963	10.4282	6.3588	6.1583	6.2649	5.0865
TCGA-B8-5159-01A	7.7531	6.2384	10.5099	12.208	11.6839	6.1742	6.0244	6.2643	4.2117
TCGA-BP-4756-01A	7.5477	6.6475	9.4731	11.4271	10.3947	3.078	6.3482	6.264	4.9766
TCGA-BP-4158-01A	6.8568	5.952	9.6237	12.111	10.4239	4.5523	6.6427	6.251	4.7505
TCGA-BP-4976-01A	6.4799	6.447	9.5777	12.1748	11.4326	6.0194	5.783	6.1979	4.2558
TCGA-CW-6093-01A	4.8406	4.5747	9.3625	11.7257	10.6926	6.4564	6.1967	6.1775	4.7743
TCGA-CZ-5986-01A	7.6986	6.4952	10.3397	10.9155	10.8173	5.5852	6.2337	6.1601	4.5832
TCGA-BP-5168-01A	6.1325	4.46	9.3599	12.8448	10.0139	2.6444	6.0299	6.1592	4.5436
TCGA-A3-3320-01A	7.7607	7.2456	10.7611	11.9319	11.0061	7.5804	6.5985	6.1581	5.4881
TCGA-CJ-4638-01A	5.7161	5.3228	8.2486	11.9405	8.9836	2.717	6.1291	6.1434	4.7053
TCGA-B0-5115-01A	7.1636	6.5421	10.0468	11.885	10.8327	5.235	6.1665	6.108	4.8987
TCGA-BP-5177-01A	6.7685	4.8533	9.4568	12.09	9.8442	2.8682	6.0696	6.0599	4.2136
TCGA-A3-3365-01A	6.7211	5.968	10.3584	12.0371	10.5856	4.4751	6.3145	6.0443	4.9812
TCGA-B0-5695-01A	6.1661	5.4505	9.2495	12.3507	10.4351	6.1034	5.7577	6.0378	3.7885
TCGA-B0-5693-01A	7.2739	5.9223	9.9219	12.2311	9.9767	6.6899	6.2723	6.0201	4.7313
TCGA-BP-4784-01A	6.5691	4.8906	9.2147	12.1696	9.448	1.7606	5.5961	6.0149	3.649
TCGA-BP-4774-01A	6.4619	6.0364	10.0586	12.3898	10.451	1.2943	6.687	6.0123	5.1643
TCGA-BP-4974-01A	6.4388	6.4979	10.0092	11.9041	9.9972	3.2157	6.1005	6.0044	4.2967
TCGA-AK-3458-01A	8.8965	6.6522	9.7488	12.8533	9.8904	5.6405	6.1	5.9947	4.3443
TCGA-BP-4351-01A	7.1098	7.8548	10.2036	12.6304	10.6047	2.8708	6.6793	5.9619	5.865
TCGA-EU-5904-01A	8.2611	6.4349	10.4695	12.5871	10.2643	6.1511	5.5433	5.9559	4.5409
TCGA-CW-5583-01A	5.7242	5.1445	9.5266	12.2028	9.886	7.3919	5.5836	5.9333	3.9755
TCGA-B8-4151-01A	7.1166	5.5088	10.0537	12.714	11.1839	5.7885	5.5664	5.9269	4.2895
TCGA-BP-4355-01A	6.4528	5.52	10.1842	12.3761	9.8384	2.5819	6.843	5.9157	5.9054
TCGA-B0-5116-01A	5.7753	4.1785	8.7175	12.2676	10.0157	2.7447	5.9846	5.8984	5.2961
TCGA-CZ-5453-01A	6.6386	5.4959	8.3261	12.2681	8.9687	4.6445	5.9159	5.8925	4.6814
TCGA-CW-5581-01A	7.4356	5.881	9.8056	11.9458	10.5493	3.9526	5.3123	5.8892	3.7508
TCGA-B0-4828-01A	6.619	6.2424	9.1802	12.2582	10.2369	3.8399	6.2965	5.8805	5.2282
TCGA-AK-3436-01A	6.9044	4.8145	8.4668	12.6461	10.0497	3.4234	7.1163	5.8793	5.8019
TCGA-CW-5591-01A	6.9481	5.5609	9.6799	11.7451	9.8597	4.353	5.6688	5.8448	3.7116
TCGA-BP-5186-01A	6.7326	5.0928	9.268	12.2729	10.5302	4.3838	5.9608	5.8407	5.0502
TCGA-B0-4706-01A	5.8102	5.4693	8.7151	12.156	10.8462	4.5264	5.9546	5.8001	4.2855
TCGA-AK-3454-01A	6.4143	5.8642	9.9956	12.1472	10.9014	7.4205	6.1243	5.7752	4.2355
TCGA-AK-3461-01A	6.8916	6.398	10.0618	12.184	10.5391	6.3214	5.8861	5.7498	3.7129
TCGA-BP-4760-01A	6.8411	5.5059	9.3734	11.6731	9.5051	4.7861	5.36	5.7498	3.6197
TCGA-BP-4999-01A	7.0563	6.4723	10.298	12.0469	10.4484	6.4723	6.1156	5.7387	5.1853
TCGA-DV-A4W0-01A	6.8895	5.006	10.2365	12.1771	9.8867	3.1537	5.7291	5.7289	4.2919
TCGA-B4-5844-01A	5.4465	5.1109	9.7531	11.9714	10.762	6.0329	5.6977	5.7288	4.1673
TCGA-CW-6088-01A	6.7957	6.0016	9.9925	11.8367	10.7456	6.8241	5.6428	5.6505	5.0361
TCGA-AK-3453-01A	7.0963	5.7057	8.3243	11.8065	8.5497	2.7415	5.3151	5.6395	4.2015
TCGA-B2-3923-01A	3.7906	4.246	9.0072	10.7964	9.4648	6.969	5.5769	5.616	4.0362
TCGA-B4-5378-01A	6.2686	5.5705	9.663	12.0325	10.4592	7.1383	5.7629	5.6075	3.6322
TCGA-T7-A92I-01A	7.3657	6.7838	9.6122	11.6518	9.5657	2.8643	5.2739	5.5748	4.2666
TCGA-BP-4340-01A	5.6963	5.4759	9.3476	11.7517	10.5037	5.1573	5.5501	5.5587	3.8306
TCGA-CZ-4859-01A	6.3168	5.6431	9.1619	12.2972	10.0992	5.5749	5.0127	5.4529	3.5569
TCGA-BP-4177-01A	6.8691	5.0504	9.4195	11.675	9.1803	3.2024	5.3086	5.4507	3.7708
TCGA-BP-5187-01A	6.9361	5.718	10.3074	11.7159	10.4074	1.2954	5.3576	5.4324	3.8167
TCGA-A3-3385-01A	6.6934	6.05	9.4155	12.2573	10.9559	5.8419	5.4434	5.4322	4.8086
TCGA-B0-5099-01A	5.2184	4.6072	9.3683	12.1666	8.8838	2.0414	5.1086	5.4156	3.6653
TCGA-CJ-5681-01A	7.5301	5.9736	10.001	11.3091	9.5439	4.07	4.9022	5.1936	4.0409
TCGA-AK-3440-01A	5.0053	4.3465	8.6697	11.4994	8.2186	2.6931	4.8667	5.1813	3.0266
TCGA-BP-4789-01A	6.1225	4.3302	9.0143	12.1036	9.4485	4.1405	5.0689	5.1428	3.7807
TCGA-B0-4845-01A	6.0692	5.8782	9.6385	12.4942	10.3129	5.7099	5.9338	5.1377	4.2509
TCGA-A3-A8OW-01A	6.9644	6.0199	9.6634	12.5608	9.5989	5.8353	5.4024	5.0419	3.4762
TCGA-DV-5567-01A	5.3808	4.2669	8.8827	12.2416	9.7823	1.8325	4.9439	4.9882	4.0045
TCGA-BP-5192-01A	5.9385	5.447	9.1668	12.336	9.9074	3.3934	4.5008	4.8345	2.8539
TCGA-B8-4619-01A	4.8068	4.4011	8.816	11.5115	8.2815	3.207	4.8759	4.7343	3.207
TCGA-B0-5117-01A	4.5267	4.0811	8.2254	11.6191	7.5719	3.1639	5.9313	4.7023	4.4879
TCGA-BP-4969-01A	5.2523	5.1027	9.3188	12.8347	9.2163	1.6253	4.9358	4.6783	3.7999
TCGA-BP-4765-01A	6.4514	5.7547	10.3868	11.8902	10.6551	3.1668	5.2123	4.6766	3.6794
TCGA-AK-3447-01A	5.2332	4.5924	9.1897	11.2161	8.264	5.1178	5.0772	4.6489	3.651
TCGA-B0-5098-01A	5.7484	4.2765	7.0779	11.393	8.1263	4.1714	4.8364	4.5313	2.9648
TCGA-CW-5585-01A	4.8123	4.2949	8.9503	12.7294	9.8499	3.9706	5.0521	4.4458	3.6194
TCGA-B8-5546-01A	3.3206	3.2466	7.6955	11.2618	8.7231	3.0862	4.1279	4.4249	3.2466
TCGA-G6-A8L8-01A	5.8681	4.9149	8.4304	13.0494	9.2598	1.7289	4.7997	4.4175	2.493
TCGA-B8-A54K-01A	4.3405	4.4627	8.0016	12.2267	8.7409	3.4401	4.8008	4.372	2.7703
TCGA-DV-A4VZ-01A	4.5735	3.0457	7.5949	12.5718	7.3139	1.0263	4.5417	4.2156	3.2164
TCGA-B0-5703-01A	4.7274	3.1949	8.8353	12.4427	9.772	6.4371	4.8084	4.1139	3.3472
TCGA-DV-5576-01A	3.9496	2.9392	8.2272	11.9379	8.9457	3.4106	4.2316	4.113	2.6294
TCGA-B0-4707-01A	4.3527	3.748	7.1465	12.6749	9.0612	3.748	4.2385	4.0483	2.5017
TCGA-BP-4769-01A	5.9048	4.693	8.3879	11.7209	8.532	1.5424	3.8848	3.6412	3.4524
TCGA-A3-3328-01A	3.3658	3.0785	6.9455	11.8314	7.814	5.6084	4.6376	3.4501	2.5764
TCGA-B0-4834-01A	2.132	3.1265	7.9929	10.7966	8.2527	2.132	3.278	1.7726	2.132
