# Supplementary material for: Systematic Analysis of the Expression and Prognosis of Fcγ Receptors in Clear Cell Renal Cell Carcinoma
Source: Front Oncol. 2022 Mar 17;12:755936. doi: 10.3389/fonc.2022.755936 (PMC8969749; doi:10.3389/fonc.2022.755936)
Supplement: Supplementary file 2 [file Table_2.xlsx]

## Sheet: Sheet1
FCG3B multivariate regression analysis
	coefficient	Standard Error of Regression Coefficients	Z Value	HR=exp(coef))	Lower (95%)	Upper (95%)	P Value
FCGR3B	-0.0413	0.1591	-0.2594	0.9596	0.7025	1.3107	0.7954
RACE	0.0702	0.3266	0.2151	1.0728	0.5655	2.035	0.8297
Longest_dimention of tumor	0.1973	0.1078	1.8311	1.2181	0.9862	1.5046	0.0671
Age	0.0296	0.0069	4.3015	1.03	1.0162	1.044	<0.0001
Gender	0.0912	0.1645	0.5544	1.0955	0.7936	1.5123	0.5793
FCG3A multivariate regression analysis
	coefficient	Standard Error of Regression Coefficients	Z Value	HR=exp(coef))	Lower (95%)	Upper (95%)	P Value
FCGR3A	0.1823	0.1572	1.1595	1.2	0.8817	1.6331	0.2463
RACE	0.0486	0.3272	0.1486	1.0498	0.5528	1.9936	0.8819
Longest_dimention of tumor	0.1889	0.1064	1.7759	1.2079	0.9806	1.4879	0.0757
Age	0.0296	0.0069	4.2979	1.03	1.0162	1.044	<0.0001
Gender	0.0799	0.1648	0.4848	1.0832	0.7842	1.4962	0.6278
FCG2C multivariate regression analysis
	coefficient	Standard Error of Regression Coefficients	Z Value	HR=exp(coef))	Lower (95%)	Upper (95%)	P Value
FCGR2C	0.2624	0.1569	1.6728	1.3001	0.956	1.7681	0.0944
RACE	0.1137	0.3275	0.3472	1.1205	0.5896	2.1291	0.7284
Longest_dimention of tumor	0.1904	0.106	1.7958	1.2098	0.9827	1.4893	0.0725
Age	0.0297	0.0069	4.3288	1.0302	1.0164	1.0441	<0.0001
Gender	0.087	0.1648	0.528	1.0909	0.7898	1.5069	0.5975
FCG2B multivariate regression analysis
	coefficient	Standard Error of Regression Coefficients	Z Value	HR=exp(coef))	Lower (95%)	Upper (95%)	P Value
FCGR2B	0.2243	0.1568	1.4302	1.2514	0.9203	1.7017	0.1527
RACE	0.073	0.3265	0.2237	1.0758	0.5672	2.0403	0.823
Longest_dimention of tumor	0.1851	0.1064	1.7398	1.2033	0.9768	1.4824	0.0819
Age	0.03	0.0069	4.3645	1.0304	1.0167	1.0444	<0.0001
Gender	0.081	0.1648	0.4914	1.0843	0.7851	1.4977	0.6231
FCG2A multivariate regression analysis
	coefficient	Standard Error of Regression Coefficients	Z Value	HR=exp(coef))	Lower (95%)	Upper (95%)	P Value
FCGR2A	0.2864	0.1579	1.8138	1.3316	0.9772	1.8145	0.0697
RACE	0.0695	0.3266	0.2129	1.072	0.5652	2.0332	0.8314
Longest_dimention of tumor	0.1878	0.1062	1.7676	1.2066	0.9798	1.4859	0.0771
Age	0.0297	0.0069	4.3282	1.0302	1.0164	1.0441	<0.0001
Gender	0.0514	0.1659	0.3099	1.0528	0.7605	1.4574	0.7566
FCG1C multivariate regression analysis
	coefficient	Standard Error of Regression Coefficients	Z Value	HR=exp(coef))	Lower (95%)	Upper (95%)	P Value
FCGR1C	0.7155	0.1672	4.2799	2.0452	1.4738	2.8382	<0.0001
RACE	-0.0497	0.3281	-0.1516	0.9515	0.5002	1.8101	0.8795
Longest_dimention of tumor	0.1233	0.1084	1.1373	1.1312	0.9147	1.3989	0.2554
Age	0.0292	0.0069	4.2153	1.0297	1.0158	1.0437	<0.0001
Gender	0.0318	0.1652	0.1925	1.0323	0.7468	1.4269	0.8473
FCG1B multivariate regression analysis
	coefficient	Standard Error of Regression Coefficients	Z Value	HR=exp(coef))	Lower (95%)	Upper (95%)	P Value
FCGR1B	0.5154	0.1655	3.1135	1.6743	1.2104	2.316	0.0018
RACE	0.0008	0.3273	0.0024	1.0008	0.5269	1.901	0.9981
Longest_dimention of tumor	0.1439	0.1079	1.3344	1.1548	0.9347	1.4267	0.1821
Age	0.028	0.0069	4.0529	1.0284	1.0146	1.0425	<0.0001
Gender	0.0184	0.1659	0.1109	1.0186	0.7358	1.4101	0.9117
FCG1B multivariate regression analysis
	coefficient	Standard Error of Regression Coefficients	Z Value	HR=exp(coef))	Lower (95%)	Upper (95%)	P Value
FCGR1A	0.4544	0.1631	2.7858	1.5753	1.1442	2.1687	0.0053
RACE	0.0178	0.3273	0.0544	1.018	0.5359	1.9336	0.9566
Longest_dimention of tumor	0.1629	0.1071	1.5213	1.177	0.9541	1.4519	0.1282
Age	0.029	0.0069	4.1991	1.0294	1.0156	1.0434	<0.0001
Gender	0.0274	0.166	0.165	1.0278	0.7424	1.4228	0.8689
