# Supplementary material for: Systematic Analysis of the Expression and Prognosis of Fcγ Receptors in Clear Cell Renal Cell Carcinoma
Source: Front Oncol. 2022 Mar 17;12:755936. doi: 10.3389/fonc.2022.755936 (PMC8969749; doi:10.3389/fonc.2022.755936)
Supplement: Supplementary file 3 [file Table_3.xlsx]

## Sheet: Sheet1
FCGR1B
C1QB
FCGR1C
C1QC
LAIR1
LAPTM5
FCER1G
FCGR3A
CD53
C1QA
TNFSF13B
NCKAP1L
VAV1
AIF1
LILRB4
PLEK
GAL3ST4
TLR8
CD86
SPI1
MS4A6A
CD4
FCGR1A
STAC3
TNFAIP8L2
WAS
FAM26F
SLAMF8
CYTH4
LCP2
BATF
LILRB1
HCK
LAT2
MS4A4A
RNASE6
C3AR1
PLB1
CSF1R
SIGLEC9
SLCO2B1
TBXAS1
CLEC4A
FPR3
MSR1
FPR1
CYBB
NLRC4
SIRPB2
CD163
FCGR2C
FCGR2A
ALOX5AP
CD14
PILRA
ADORA3
CD33
FCGR2B
TLR6
CD84
CLEC7A
SIGLEC5
ADAM28
GPR141
C17orf87
AOAH
GPR65
DOCK2
CXCR2
CSF3R
CXCL1
MMP25
CXCL6
IL8
S100A8
S100A9
S100P
APOBEC3A
PF4V1
FPR2
TMEM71
SAA1
SLC11A1
RASGRP4
TMEM154
S100A12
NCF2
MNDA
